# Supplementary material
Source: PubMed Central journal article supplement (PMC5961399)
Supplement: DC172010SupplementaryData.pdf [file DC172010SupplementaryData.pdf]

SUPPLEMENTARY DATA

**Aspects of multi-component integrated care promote sustained improvement in surrogate clinical outcomes: a systematic review and meta-analysis (Online-only supplementary materials)**

|                 | <b>Title</b>                                                                                       | <b>Page(s)</b> |
|-----------------|----------------------------------------------------------------------------------------------------|----------------|
| <b>Figure 1</b> | PRISMA flow diagram of studies selection                                                           | 2              |
| <b>Figure 2</b> | Risk of bias assessment                                                                            | 3              |
| <b>Figure 3</b> | Meta-analysis results of HbA <sub>1c</sub> level of included trials (in %-unit)                    | 4              |
| <b>Figure 4</b> | Meta-analysis results of HbA <sub>1c</sub> level of included trials (in mmol/mol-unit)             | 5              |
| <b>Figure 5</b> | Meta-analysis results of systolic blood pressure level of included trials (in mmHg)                | 6              |
| <b>Figure 6</b> | Meta-analysis results of diastolic blood pressure level of included trials (in mmHg)               | 7              |
| <b>Figure 7</b> | Meta-analysis results of LDL-cholesterol level of included trials (in mmol/L)                      | 8              |
| <b>Figure 8</b> | Funnel plots (unadjusted)                                                                          | 9              |
| <b>Figure 9</b> | Funnel plots (adjusted for age, sex, and baseline cardiometabolic risk factors)                    | 10             |
| <b>Table 1</b>  | Search strategy                                                                                    | 11             |
| <b>Table 2</b>  | Definitions of quality improvement strategies in type 2 diabetes                                   | 12-13          |
| <b>Table 3</b>  | Definitions of outcomes of interest                                                                | 14             |
| <b>Table 4</b>  | Baseline characteristics of trials included in the meta-analysis                                   | 15             |
| <b>Table 5</b>  | Effects of multi-component integrated care on care processes                                       | 16-17          |
| <b>Table 6</b>  | Cardiometabolic effects of individual quality improvement strategy stratified by regions           | 18-20          |
| <b>Table 7</b>  | Meta-regression analysis of the cardiometabolic effects of individual quality improvement strategy | 21             |
| <b>Table 8</b>  | Comparison of two meta-analyses                                                                    | 22-23          |
| <b>Table 9</b>  | Education programs and other characteristics of trials included in the meta-analysis               | 24-67          |

SUPPLEMENTARY DATA

**Supplementary Figure 1. PRISMA flow diagram of studies selection**

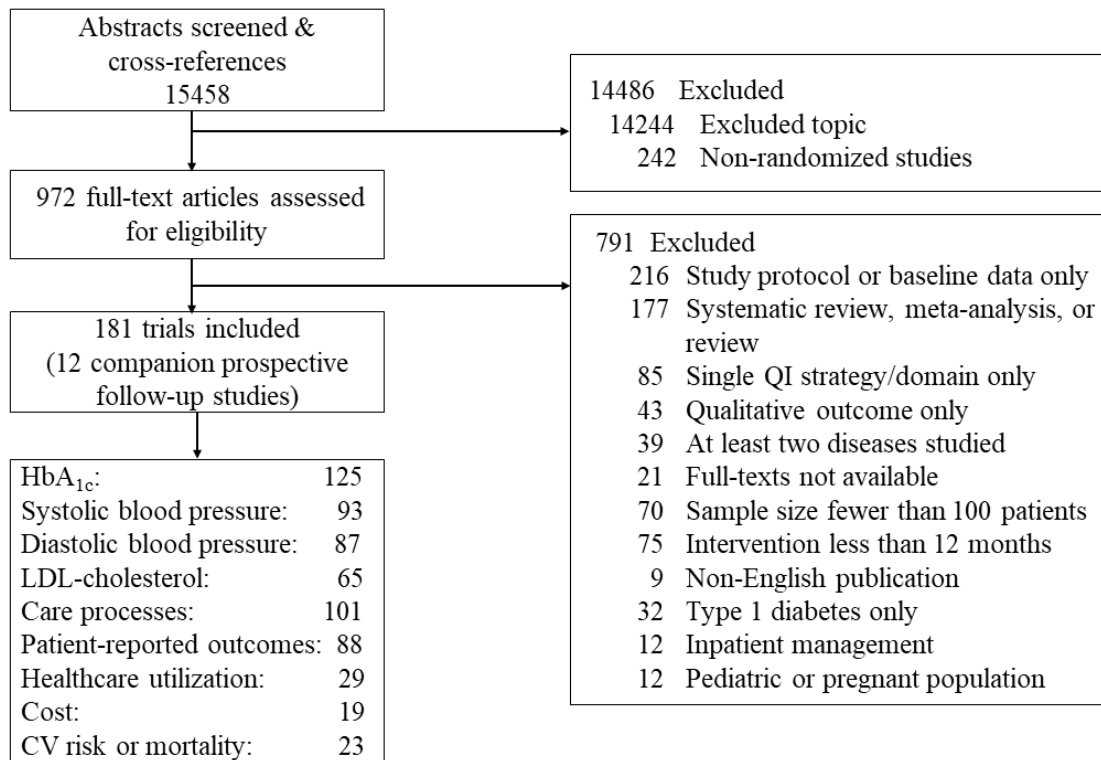

Footnotes: CV, cardiovascular; HbA<sub>1c</sub>, glycated hemoglobin; LDL-cholesterol, low-density lipoprotein cholesterol; QI, quality improvement.

SUPPLEMENTARY DATA

Supplementary Figure 2. Risk of bias assessment

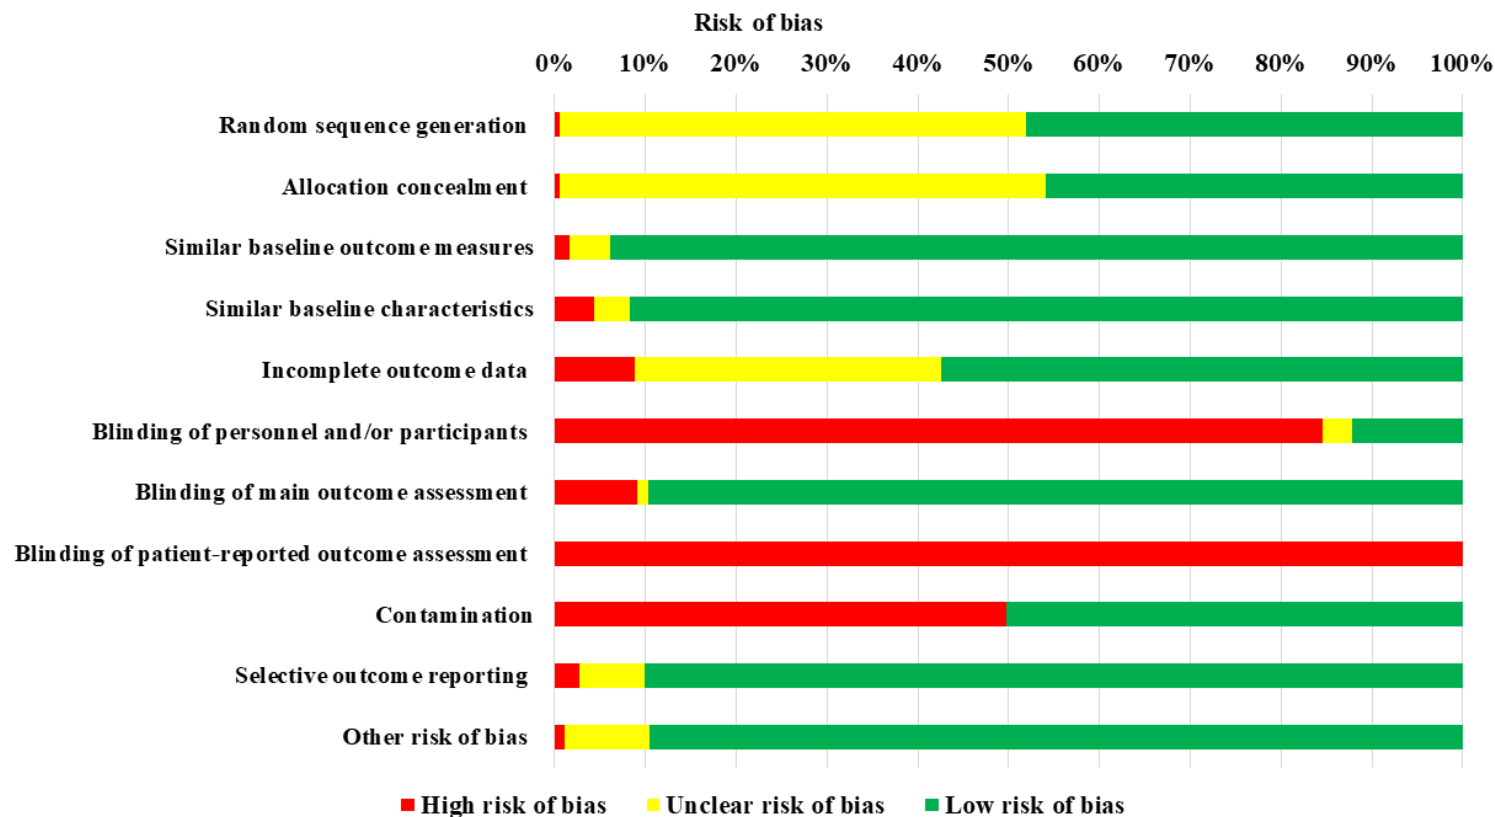

Footnotes: Differences in risks of bias can help explain heterogeneity of trial results. Using the Cochrane Effective Practice and Organization of Care risk-of-bias tool, each trial was assessed based on seven categories of biases, which were selection bias (random sequence generation, allocation concealment, similar baseline outcome measures and characteristics), attrition bias (incomplete outcome data), performance bias (blinding of personnel and/or participants), detection bias (blinding of main and patient-reported outcomes assessments), contamination bias, reporting bias (selective outcome reporting), and other risk of bias. Each bias was classified into “high risk”, “low risk”, or “unclear risk”.

SUPPLEMENTARY DATA

Supplementary Figure 3. Meta-analysis results of HbA<sub>1c</sub> level of included trials (in %-unit)

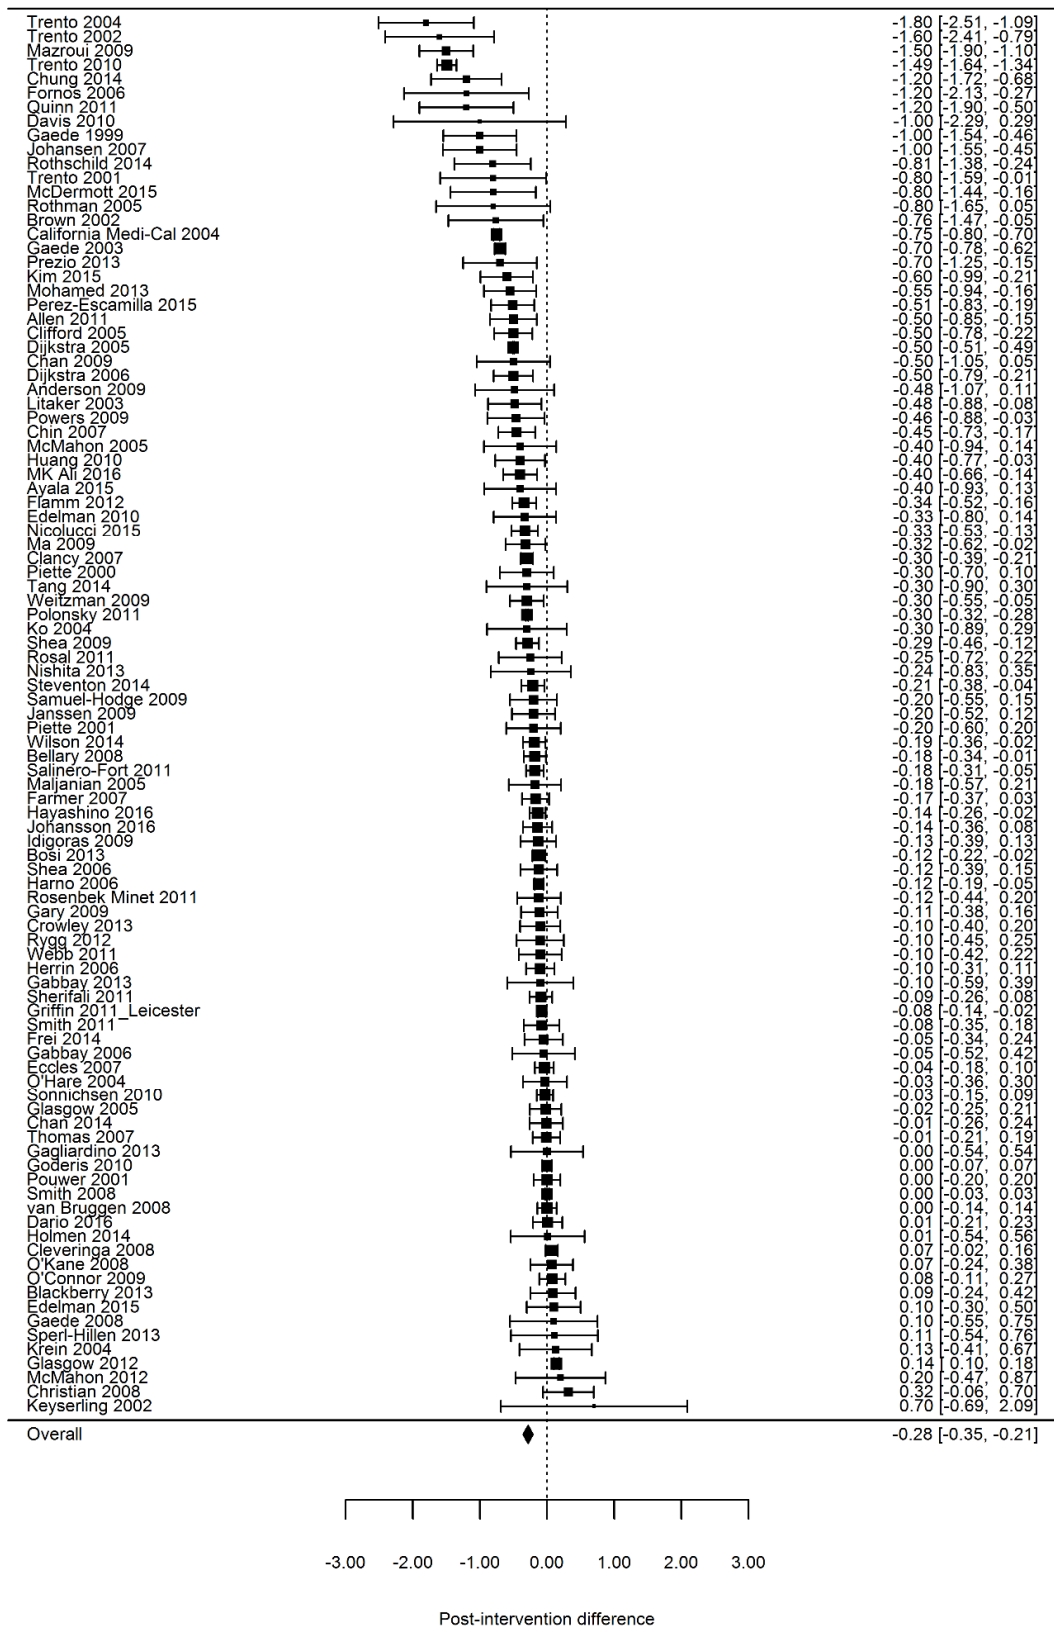

SUPPLEMENTARY DATA

Supplementary Figure 4. Meta-analysis results of HbA<sub>1c</sub> level of included trials (in mmol/mol-unit)

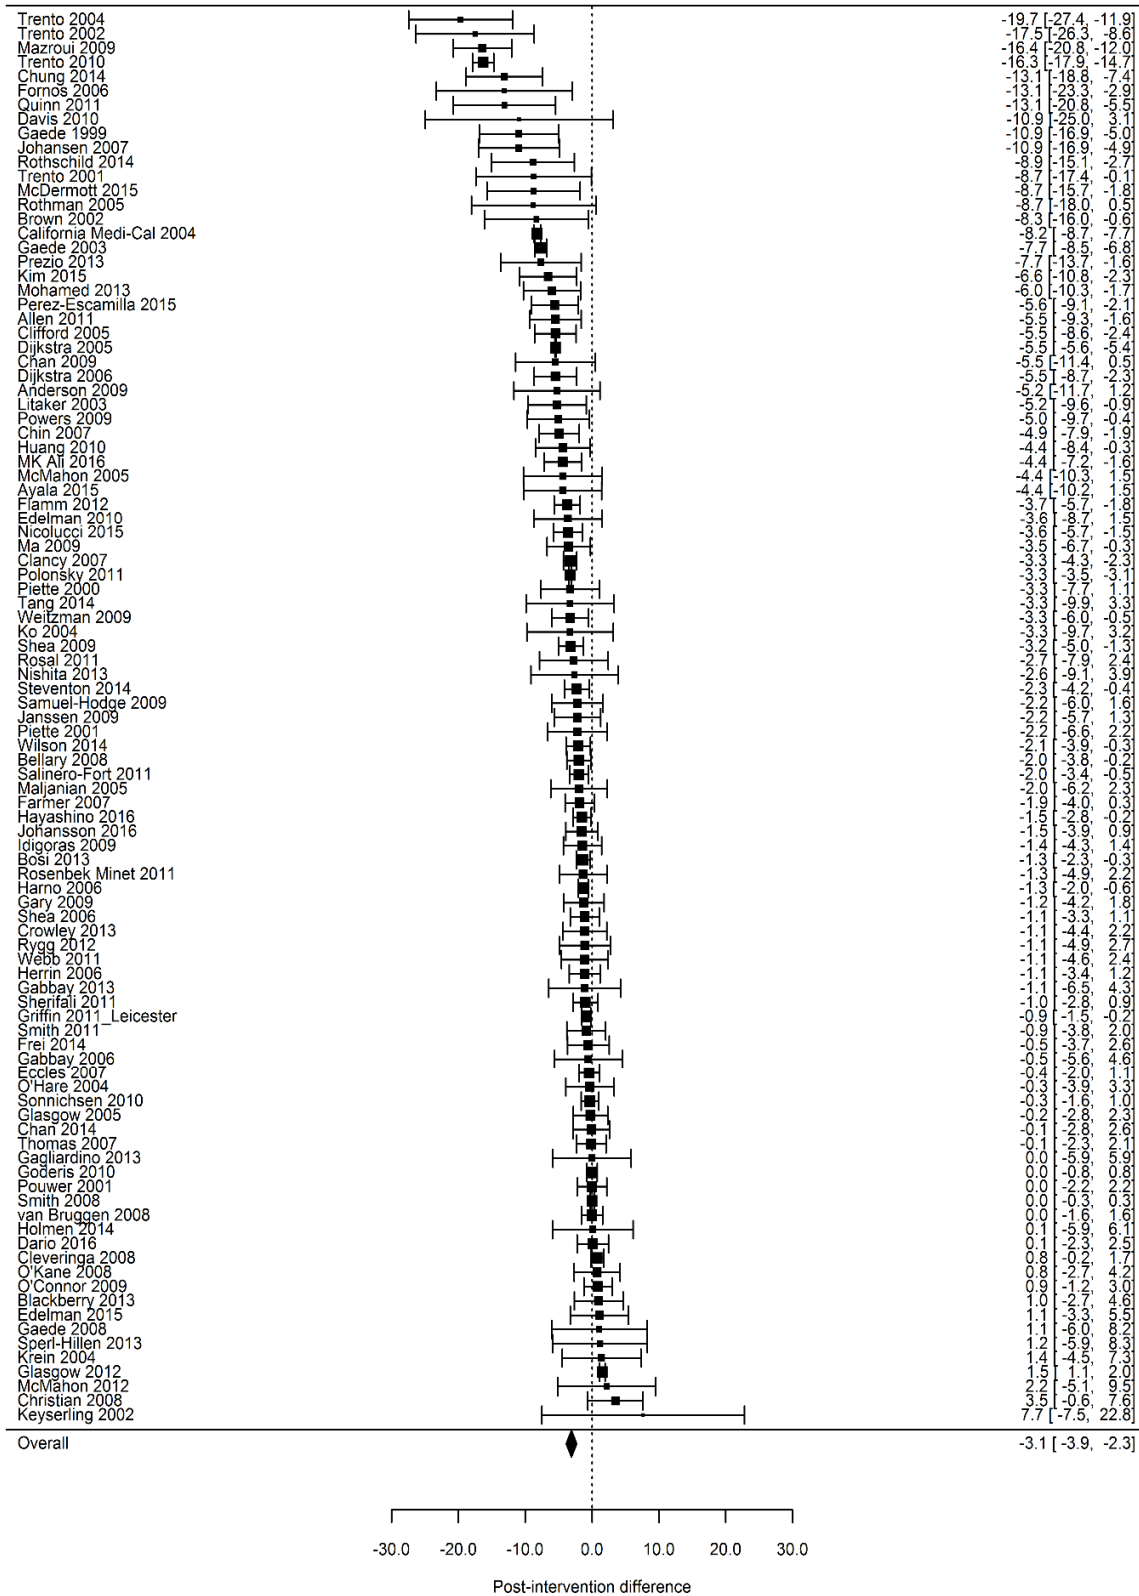

SUPPLEMENTARY DATA

Supplementary Figure 5. Meta-analysis results of systolic blood pressure level of included trials (in mmHg)

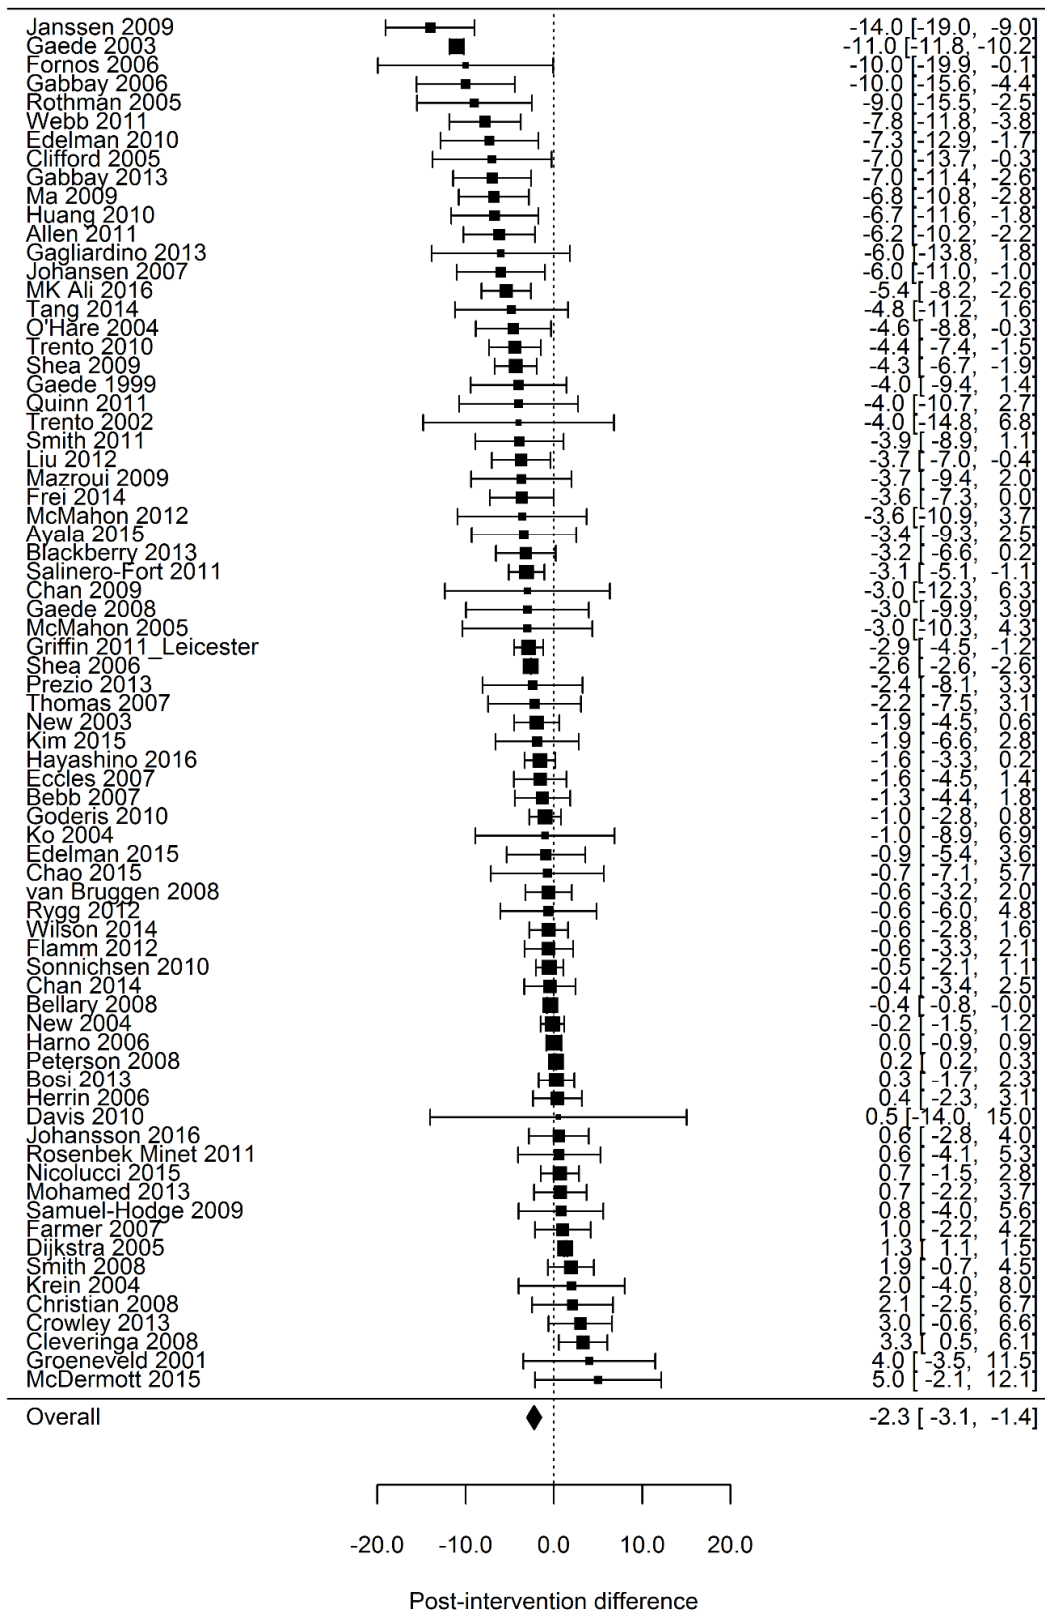

SUPPLEMENTARY DATA

Supplementary Figure 6. Meta-analysis results of diastolic blood pressure level of included trials (in mmHg)

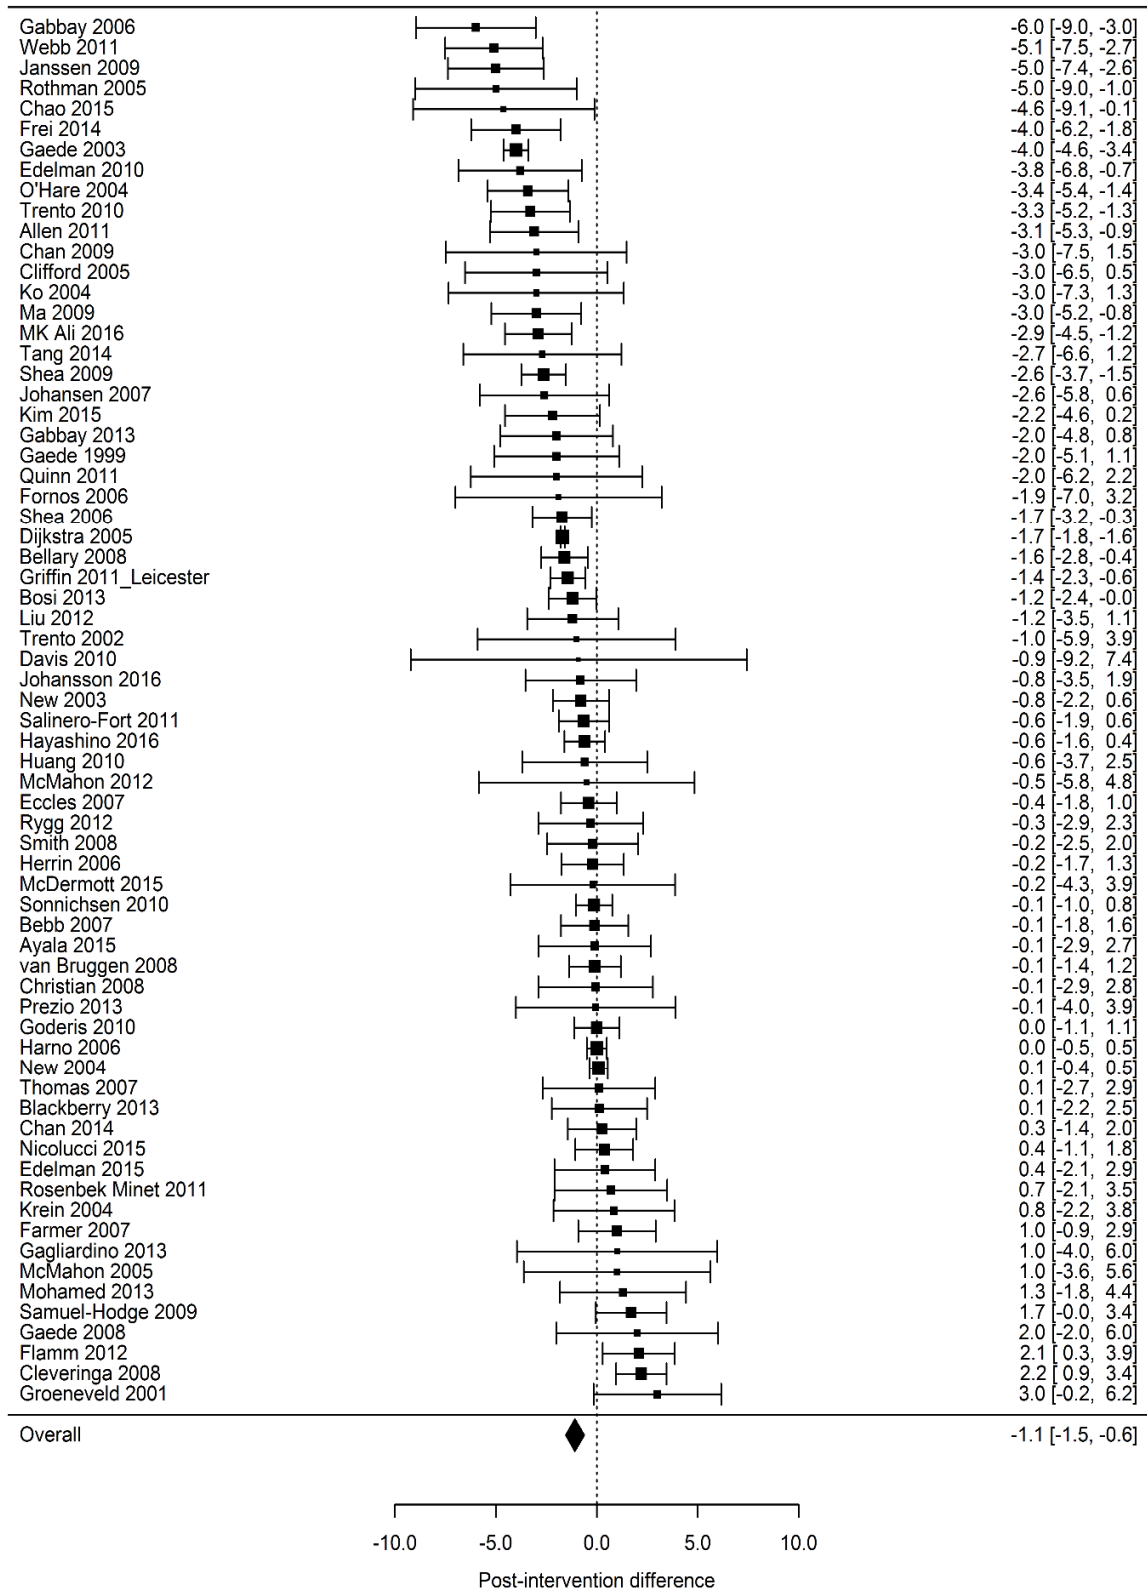

SUPPLEMENTARY DATA

Supplementary Figure 7. Meta-analysis results of LDL-cholesterol level of included trials (in mmol/L)

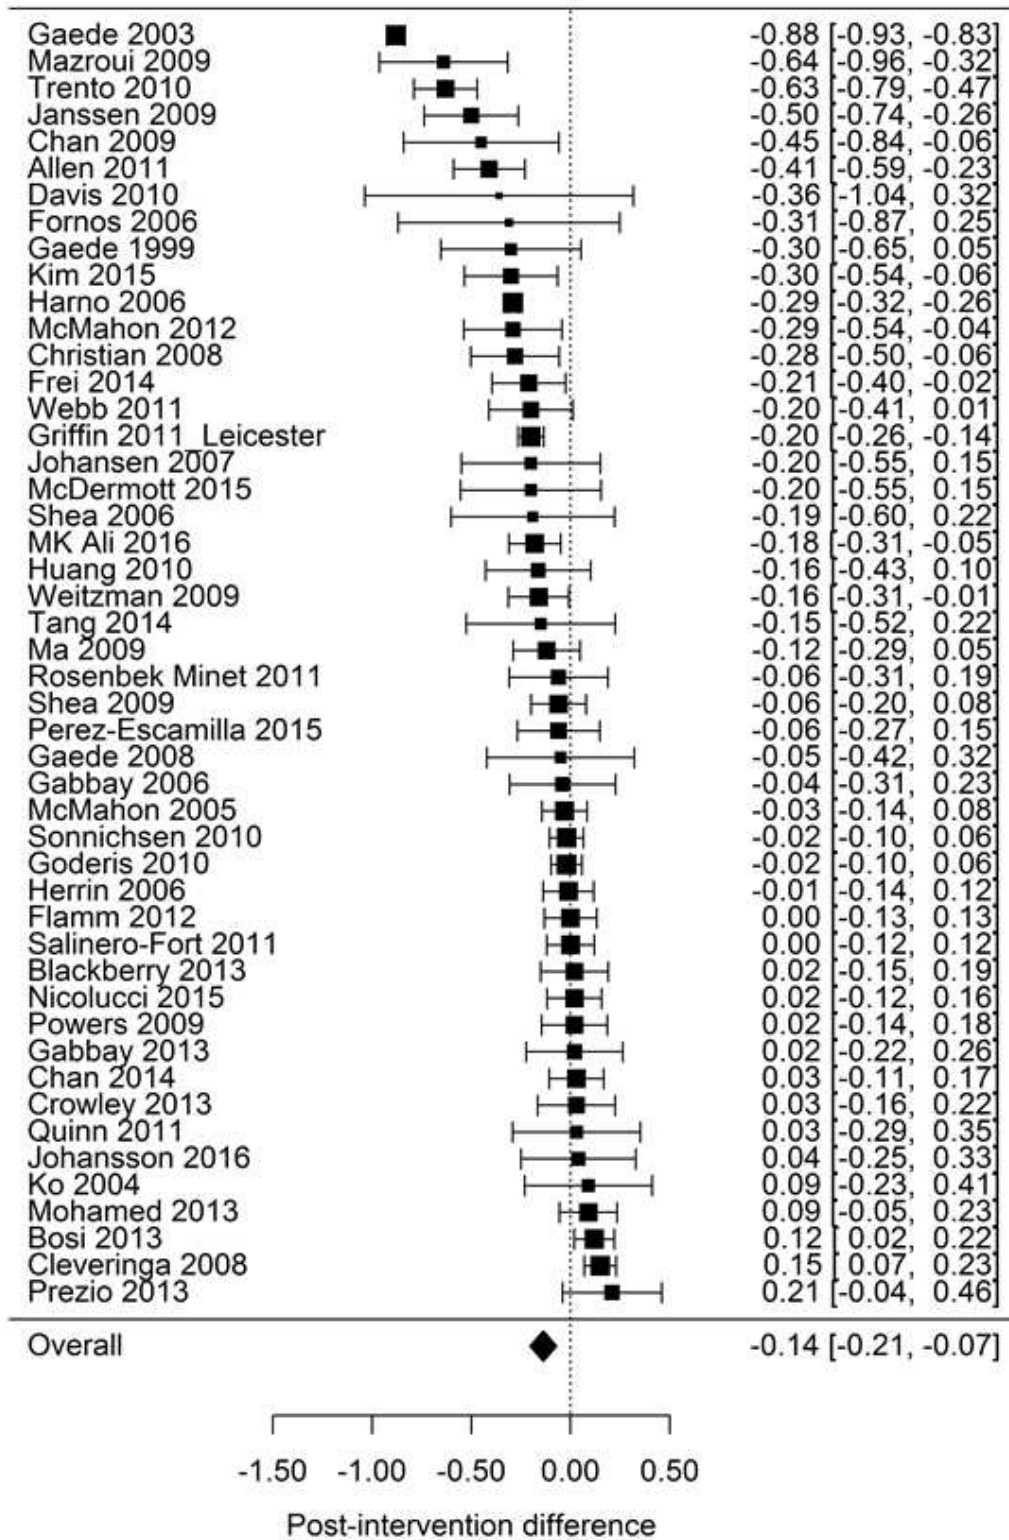



SUPPLEMENTARY DATA

Supplementary Figure 8. Funnel plots (unadjusted)

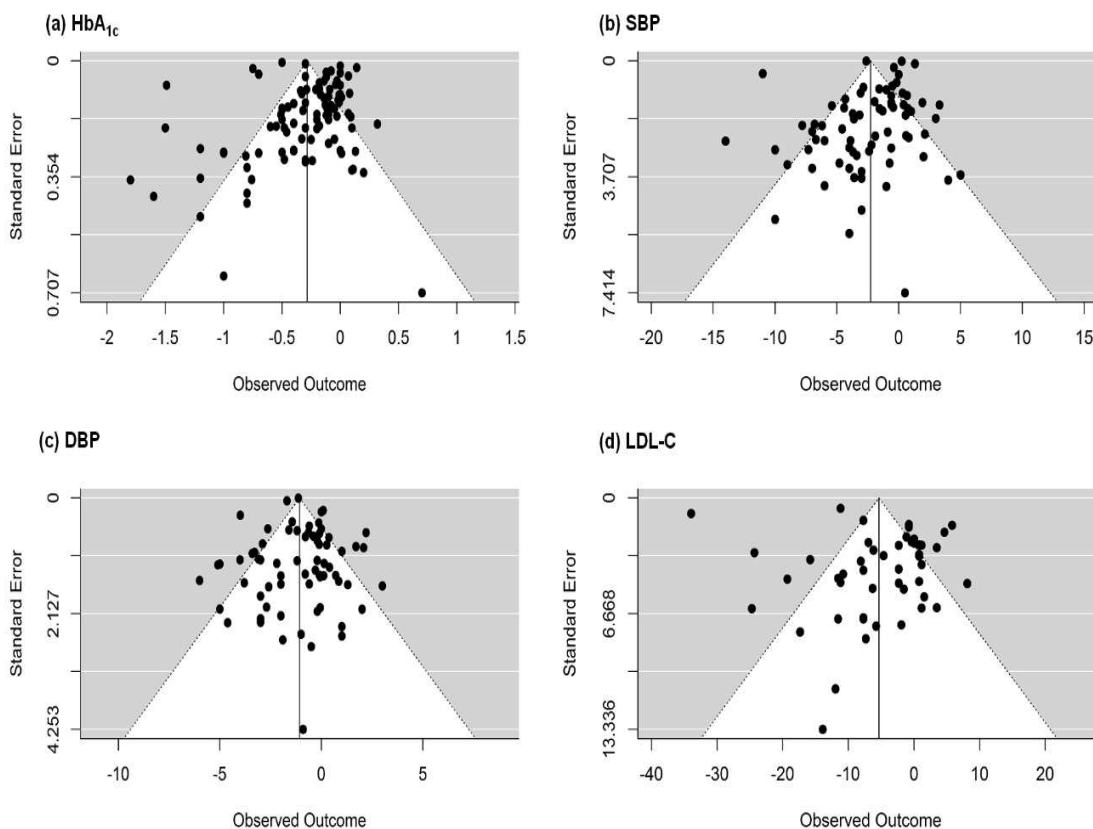

Footnotes: DBP, diastolic blood pressure; HbA<sub>1c</sub>, glycated hemoglobin; LDL-C, low-density lipoprotein cholesterol; SBP, systolic blood pressure.

SUPPLEMENTARY DATA

**Supplementary Figure 9. Funnel plots (adjusted for age, sex, and baseline cardiometabolic risk factors)**

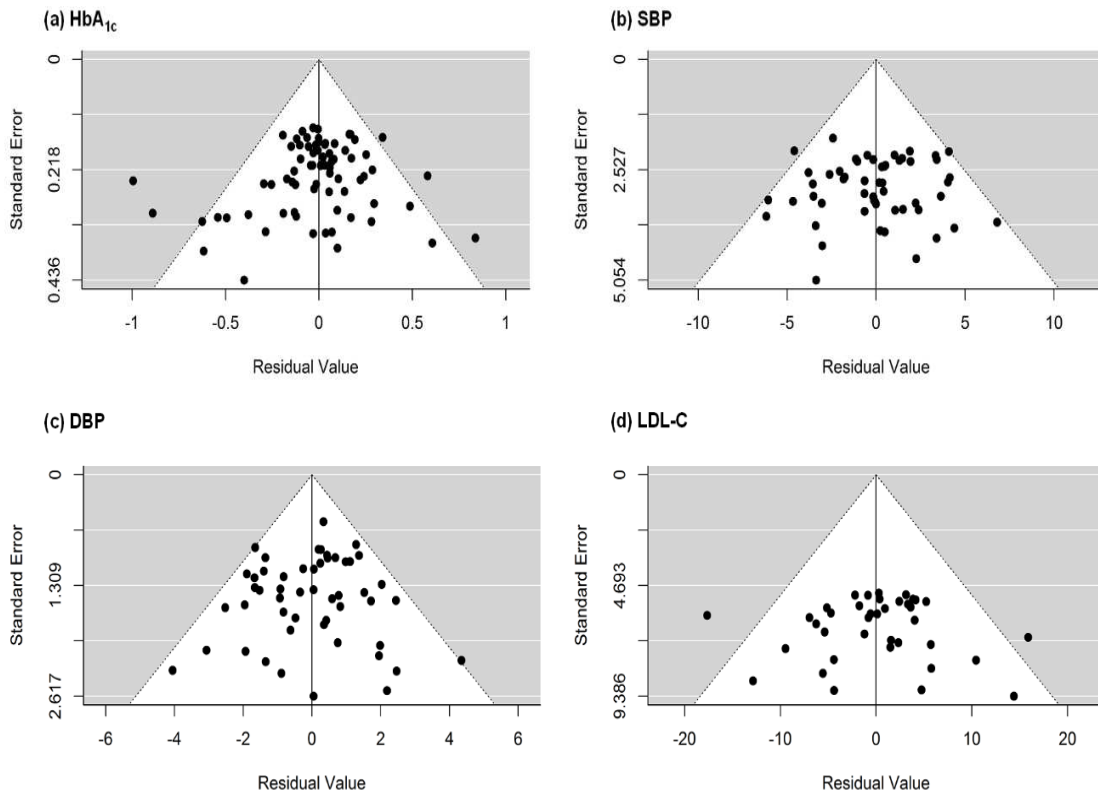

Footnotes: Additional adjustment for care settings did not further reduce the study heterogeneity (data not shown). DBP, diastolic blood pressure; HbA<sub>1c</sub>, glycated hemoglobin; LDL-C, low-density lipoprotein cholesterol; SBP, systolic blood pressure.

SUPPLEMENTARY DATA

**Supplementary Table 1. Search Strategy**

| Item (#) | Search terms                                                                                                                                      |
|----------|---------------------------------------------------------------------------------------------------------------------------------------------------|
| 1.       | Type 2 diabetes OR Type 2 diabetes mellitus OR Diabetes OR Diabetes mellitus                                                                      |
| 2.       | Quality improvement OR Quality AND Care                                                                                                           |
| 3.       | Structured care OR Shared care OR Multidisciplinary care OR Multidisciplinary team OR Multicomponent care OR Multifaceted care OR Integrated care |
| 4.       | Peer OR Peer support OR Nurse OR Dietitian OR Pharmacist                                                                                          |
| 5.       | Education OR Self-management                                                                                                                      |
| 6.       | Telemedicine OR Telehealth OR Electronic health OR e-health                                                                                       |
| 7.       | Filters:<br>a) Publication dates (custom date range): January 2000 till August 2016<br>b) Species: Humans                                         |
| 8.       | Search #1 AND #2                                                                                                                                  |
| 9.       | Search #1 AND #3                                                                                                                                  |
| 10.      | Search #1 AND #4                                                                                                                                  |
| 11.      | Search #1 AND #5                                                                                                                                  |
| 12.      | Search #1 AND #6                                                                                                                                  |

SUPPLEMENTARY DATA

**Supplementary Table 2. Definitions of quality improvement strategies in type 2 diabetes**

| <b>(A) Health system</b>                                      |                                                                                                                                                                                                                                                                                                                                                                                                                                                                                                                                                                                                                                                                                                                                                                              |
|---------------------------------------------------------------|------------------------------------------------------------------------------------------------------------------------------------------------------------------------------------------------------------------------------------------------------------------------------------------------------------------------------------------------------------------------------------------------------------------------------------------------------------------------------------------------------------------------------------------------------------------------------------------------------------------------------------------------------------------------------------------------------------------------------------------------------------------------------|
| <b>Subcategory</b>                                            | <b>Definition(s)</b>                                                                                                                                                                                                                                                                                                                                                                                                                                                                                                                                                                                                                                                                                                                                                         |
| Case management                                               | <ul style="list-style-type: none"> <li>○ Coordination of routine management of patients in collaboration with, or supplementary to the primary care practitioners by:               <ul style="list-style-type: none"> <li>i. a person: healthcare providers, trained peers or community health workers, social workers.</li> <li>ii. presence of a multidisciplinary team.</li> </ul> </li> </ul>                                                                                                                                                                                                                                                                                                                                                                           |
| Team change                                                   | <ul style="list-style-type: none"> <li>○ Changes to the structure/organisation of the primary healthcare team, with the presence of any of the following:               <ul style="list-style-type: none"> <li>i. adding a team member or collaborative care/joint visits, e.g. routine visits from diabetes specialist nurses, pharmacists, nutritionists, podiatrists.</li> <li>ii. use of a multidisciplinary team, e.g. medicine, nursing, pharmacy, nutrition, psychology.</li> <li>iii. expansion or revision of professional roles, e.g. prescription autonomy to nurses or pharmacists.</li> </ul> </li> <li>○ Studies with “case management” could qualify as “team changes” if at least two of the above conditions were met.</li> </ul>                           |
| Electronic patient registry                                   | <ul style="list-style-type: none"> <li>○ Design of a new electronic medical record or tracking system, or improvement in the pre-existing electronic system during the study period.</li> </ul>                                                                                                                                                                                                                                                                                                                                                                                                                                                                                                                                                                              |
| Facilitated relay of patient’s information to clinicians      | <ul style="list-style-type: none"> <li>○ Health information exchange between patients and healthcare providers by methods other than the traditional medical records, e.g. diabetes passports, personal reports, trained peers or community health workers, structured self-monitoring of blood glucose/dietary/exercise diaries, electronic transmission of self-care data, point-of-care HbA<sub>1c</sub> test.</li> <li>○ Included access to out-of-office consultation to primary care practitioners and patients, feedback meetings with trained peers or community health workers with subsequent changes in patient’s management plan and improved referral system.</li> <li>○ This information must get to someone with prescribing and ordering ability.</li> </ul> |
| Using electronic health (e-health) with diabetes team support | <ul style="list-style-type: none"> <li>○ Involved applying software or electronic applications to promote better diabetes care, e.g. telemedicine, mobile health (m-Health), e-Learning (smartphone apps, short messaging service, automated educational messages, multimedia use, emails, personal digital assistant).</li> <li>○ Included enhanced use of electronic databases, i.e. integration, analysis, interpretation and communication of the information to healthcare team and patients (e.g. electronic patient’s report card, risk assessment analysis).</li> </ul>                                                                                                                                                                                              |
| Continuous quality improvement                                | <ul style="list-style-type: none"> <li>○ An iterative process for testing the effects, assessing quality problems, providing solutions, and reassessing the need for further action (plan-do-study-act cycles, quality assurance).</li> <li>○ Checking on intervention fidelity or feedback on intervention delivery by trained peers or community health workers with solutions provided to enhance patient’s care.</li> </ul>                                                                                                                                                                                                                                                                                                                                              |
| <b>(B) Healthcare providers</b>                               |                                                                                                                                                                                                                                                                                                                                                                                                                                                                                                                                                                                                                                                                                                                                                                              |
| <b>Subcategory</b>                                            | <b>Definition(s)</b>                                                                                                                                                                                                                                                                                                                                                                                                                                                                                                                                                                                                                                                                                                                                                         |
| Audit and feedback                                            | <ul style="list-style-type: none"> <li>○ Benchmarking reports on the clinical performance of healthcare providers or practices on care processes.</li> </ul>                                                                                                                                                                                                                                                                                                                                                                                                                                                                                                                                                                                                                 |
| Clinician education                                           | <ul style="list-style-type: none"> <li>○ Continuous provision of up-to-date diabetes care management and guidelines to all healthcare providers, e.g. conferences/workshops, distribution of educational materials (written, video etc.), and academic detailing.</li> <li>○ If the education was related to the workflow of diabetes care model implementation, it was not categorized as clinician education.</li> </ul>                                                                                                                                                                                                                                                                                                                                                   |
| Clinician reminders                                           | <ul style="list-style-type: none"> <li>○ Paper-based or electronic system prompts to healthcare providers on patient-specific information (biomedical data or care processes), including ad-hoc clinician reminders.</li> <li>○ It is sub-classified as decision support with the provision of treatment algorithms and/or protocols to healthcare providers.</li> </ul>                                                                                                                                                                                                                                                                                                                                                                                                     |
| Financial incentive (pay for performance)                     | <ul style="list-style-type: none"> <li>○ Could be positive or negative financial incentives related to healthcare performance that were provided to healthcare providers and patients.</li> </ul>                                                                                                                                                                                                                                                                                                                                                                                                                                                                                                                                                                            |

## SUPPLEMENTARY DATA

|                              |                                                                                                                                                                                                                                                                                                                                                                                                                                                                                                                                                            |
|------------------------------|------------------------------------------------------------------------------------------------------------------------------------------------------------------------------------------------------------------------------------------------------------------------------------------------------------------------------------------------------------------------------------------------------------------------------------------------------------------------------------------------------------------------------------------------------------|
|                              | <ul style="list-style-type: none"> <li>○ Patients: changes in reimbursement as a token of achievement after participation in the program (e.g. capitation, prospective payment, or a shift from fee-for-service to salary pay structure), lower annual fee in case of treatment targets attainment.</li> <li>○ Excluded transport reimbursement, honorarium, gift cards, or stipend to patients, healthcare providers or trained peer/community health workers for any study procedures unless they contribute to treatment targets attainment.</li> </ul> |
| <b>(C) Patients</b>          |                                                                                                                                                                                                                                                                                                                                                                                                                                                                                                                                                            |
| <b>Subcategory</b>           | <b>Definition(s)</b>                                                                                                                                                                                                                                                                                                                                                                                                                                                                                                                                       |
| Patient's education          | <ul style="list-style-type: none"> <li>○ To promote better understanding of diabetes and related topics, as well as adoption of positive attitudes towards their active participation in care improvement of their disease, delivered by individual or group sessions with allied health personnel or trained peer/community health workers.</li> <li>○ Distribution of printed/electronic educational materials or patient's report card.</li> </ul>                                                                                                      |
| Promotion of self-management | <ul style="list-style-type: none"> <li>○ Provision of patient's report card or equipment (e.g. glucometer, glucose test strips, sphygmomanometer, pedometer).</li> <li>○ Access to resources only after attending education programmes (e.g. online platform for transmission of self-care records to healthcare providers, facilitated adjustments of medication dose, on-site grocery shopping, personalized goal-setting and action plan).</li> <li>○ Involvement of trained peers or community health workers.</li> </ul>                              |
| Patient reminder system      | <ul style="list-style-type: none"> <li>○ Any effort (e.g. in person, postal mail, live/automated phone calls, mobile texts, web/emails) to remind patients about appointments or important self-care aspects.</li> <li>○ If case management was included, patient's reminders needed to be explicit and an extra task to the normal case management.</li> </ul>                                                                                                                                                                                            |

SUPPLEMENTARY DATA

**Supplementary Table 3. Definitions of outcomes of interest**

| Outcomes                   | Definitions                                                                                                                                                                                                                                                                                                                                                                                                                                                                                                                                                                                                                                                                                                                                                                                                                                                                                                                                                                                                                                                                                                                                                                                                                                                                                                                                                                                                                                                                                                                                                |
|----------------------------|------------------------------------------------------------------------------------------------------------------------------------------------------------------------------------------------------------------------------------------------------------------------------------------------------------------------------------------------------------------------------------------------------------------------------------------------------------------------------------------------------------------------------------------------------------------------------------------------------------------------------------------------------------------------------------------------------------------------------------------------------------------------------------------------------------------------------------------------------------------------------------------------------------------------------------------------------------------------------------------------------------------------------------------------------------------------------------------------------------------------------------------------------------------------------------------------------------------------------------------------------------------------------------------------------------------------------------------------------------------------------------------------------------------------------------------------------------------------------------------------------------------------------------------------------------|
| Cardiometabolic            | <ul style="list-style-type: none"> <li>a) HbA<sub>1c</sub>, fasting glucose or 2-hour postprandial glucose</li> <li>b) Systolic blood pressure, diastolic blood pressure or both</li> <li>c) Lipid levels: either a full profile or single test</li> <li>d) Body weight, body mass index or waist circumference</li> </ul>                                                                                                                                                                                                                                                                                                                                                                                                                                                                                                                                                                                                                                                                                                                                                                                                                                                                                                                                                                                                                                                                                                                                                                                                                                 |
| Care process               | <ul style="list-style-type: none"> <li>a) Proportion of patients achieved target HbA<sub>1c</sub>, blood pressure or lipid levels</li> <li>b) Proportion of patients achieved weight loss targets</li> <li>c) Proportion of patients with hypoglycemia or hyperglycemia symptoms</li> <li>d) Proportion of patients performed self-monitoring of blood glucose or home blood pressure monitoring</li> <li>e) Proportion of patients with HbA<sub>1c</sub>, blood pressure, lipid or lifestyle monitoring</li> <li>f) Proportion of patients on statin or lipid-lowering drugs</li> <li>g) Proportion of patients on angiotensinogen converting enzymes inhibitors or angiotensin receptor blockers or antihypertensive drugs</li> <li>h) Proportion of patients on aspirin or antiplatelet drugs</li> <li>i) Proportion of patients underwent diabetes complications screening               <ul style="list-style-type: none"> <li>o Nephropathy: urine microalbumin, plasma creatinine test</li> <li>o Retinopathy: dilated eye examination, fundus camera, funduscopy check, ophthalmology visit</li> <li>o Neuropathy: foot examination by patients or healthcare professionals (physicians, nurses, podiatrists etc)</li> </ul> </li> <li>j) Proportion of patients quit smoking or underwent smoking cessation advice</li> <li>k) Proportion of patients attended diabetes education classes or received lifestyle advice from dietitians, pharmacists or nurses</li> <li>l) Proportion of patients received flu or pneumococcal vaccines</li> </ul> |
| Patient-reported           | Involved use of specific questionnaires to assess depression, emotional distress, quality of life, patient's satisfaction, treatment adherence, diabetes knowledge, self-efficacy etc.                                                                                                                                                                                                                                                                                                                                                                                                                                                                                                                                                                                                                                                                                                                                                                                                                                                                                                                                                                                                                                                                                                                                                                                                                                                                                                                                                                     |
| Healthcare utilization     | <ul style="list-style-type: none"> <li>a) Clinic visits: primary, secondary or tertiary care</li> <li>b) Emergency room visits</li> <li>c) Diabetes-related hospitalizations</li> </ul>                                                                                                                                                                                                                                                                                                                                                                                                                                                                                                                                                                                                                                                                                                                                                                                                                                                                                                                                                                                                                                                                                                                                                                                                                                                                                                                                                                    |
| Economic                   | Diabetes-related healthcare cost                                                                                                                                                                                                                                                                                                                                                                                                                                                                                                                                                                                                                                                                                                                                                                                                                                                                                                                                                                                                                                                                                                                                                                                                                                                                                                                                                                                                                                                                                                                           |
| Cardiovascular risks       | <ul style="list-style-type: none"> <li>a) Any diabetes-related end-points</li> <li>b) All-cause mortality</li> <li>c) Incident myocardial infarction, chronic kidney disease (or progression), stroke, amputation</li> <li>d) Cardiovascular risk scores</li> </ul>                                                                                                                                                                                                                                                                                                                                                                                                                                                                                                                                                                                                                                                                                                                                                                                                                                                                                                                                                                                                                                                                                                                                                                                                                                                                                        |
| <b>Qualifying criteria</b> | <ul style="list-style-type: none"> <li>a) At least 1 cardiometabolic <b>OR</b> care process outcome, <b>OR</b></li> <li>b) At least 1 cardiometabolic or care process outcome, <b>AND</b> patient-reported, healthcare utilization, economic or cardiovascular risks outcome (either reported simultaneously or as separate publication[s])</li> </ul>                                                                                                                                                                                                                                                                                                                                                                                                                                                                                                                                                                                                                                                                                                                                                                                                                                                                                                                                                                                                                                                                                                                                                                                                     |

SUPPLEMENTARY DATA

**Supplementary Table 4. Baseline characteristics of trials included in the meta-analysis**

|                                                                                              | <b>All trials</b>   |
|----------------------------------------------------------------------------------------------|---------------------|
| <b>Number of patients</b>                                                                    |                     |
| Type 1 diabetes                                                                              | 665 (0.5%)          |
| Type 2 diabetes                                                                              | 119,554 (88.5%)     |
| Undefined                                                                                    | 14,893 (11.0%)      |
| Total                                                                                        | 135,112 (100%)      |
| <b>Age (years)</b>                                                                           | 59.6 (0.6)          |
| <b>Women</b>                                                                                 | 67,421 (49.9%)      |
| <b>National income level</b>                                                                 |                     |
| High                                                                                         | 171 (94.5%)         |
| Upper-middle                                                                                 | 7 (3.9%)            |
| Lower-middle                                                                                 | 3 (1.7%)            |
| <b>Duration of intervention (months)</b>                                                     | 12 (12-24)          |
| <b>HbA<sub>1c</sub> (%)</b>                                                                  | 8.2 (8.0-8.4)       |
| <b>HbA<sub>1c</sub> (mmol/mol)</b>                                                           | 66 (64-68)          |
| <b>Systolic blood pressure (mmHg)</b>                                                        | 139.6 (138.1-141.2) |
| <b>Diastolic blood pressure (mmHg)</b>                                                       | 80.1 (79.1-81.1)    |
| <b>LDL-cholesterol(mmol/L)*</b>                                                              | 2.94 (2.85-3.03)    |
| <b>Number of studies per quality improvement strategy</b>                                    |                     |
| <b><i>Health system</i></b>                                                                  |                     |
| Case management                                                                              | 96 (53.0%)          |
| Team change                                                                                  | 103 (56.9%)         |
| Electronic patient registry                                                                  | 67 (37.0%)          |
| Facilitated relay of patient's information to clinicians                                     | 94 (51.9%)          |
| Electronic health                                                                            | 81 (44.8%)          |
| Continuous quality improvement                                                               | 39 (21.5%)          |
| <b><i>Healthcare providers</i></b>                                                           |                     |
| Audit and feedback                                                                           | 61 (33.7%)          |
| Clinician education                                                                          | 56 (30.9%)          |
| Clinician reminder/decision support                                                          | 126 (69.6%)         |
| Financial incentives                                                                         | 2 (1.1%)            |
| <b><i>Patient</i></b>                                                                        |                     |
| Patient education                                                                            | 165 (91.2%)         |
| Promotion of self-management                                                                 | 150 (82.9%)         |
| Patient reminder system                                                                      | 95 (52.5%)          |
| <b><i>Personnel involved</i></b>                                                             |                     |
| Diabetologists or endocrinologists                                                           | 7 (3.9%)            |
| Psychiatrists or psychologists                                                               | 5 (2.8%)            |
| Internists or other specialty doctors                                                        | 41 (22.7%)          |
| Primary care practitioners with more active role                                             | 48 (26.5%)          |
| Certified diabetes educators                                                                 | 23 (12.7%)          |
| Nurses (e.g. specialist nurses, registered nurses or practice nurses)                        | 98 (54.1%)          |
| Pharmacists                                                                                  | 10 (5.5%)           |
| Dietitians                                                                                   | 50 (27.6%)          |
| Physiotherapists or sports therapists                                                        | 9 (5.0%)            |
| Trained community health workers                                                             | 18 (9.9%)           |
| Trained peer leaders                                                                         | 16 (8.8%)           |
| Multidisciplinary team (not specified)                                                       | 9 (5.0%)            |
| Others (e.g. care managers/coordinators, healthcare assistants/facilitators, social workers) | 22 (12.2%)          |

Footnotes: Data are expressed in number (percentages) or mean (95% confidence intervals), except age in mean (standard error) and duration of intervention in median (interquartile range). HbA<sub>1c</sub>, glycated hemoglobin; LDL-C, low-density lipoprotein cholesterol.

\*To convert LDL-cholesterol to mg/dL, multiply by 38.67.

SUPPLEMENTARY DATA

**Supplementary Table 5. Effects of multi-component integrated care on care processes**

| Care processes                                | Definitions used in available trials                          | Total number of available trials | Number of trials which reported significant improvement with multi-component integrated care | Number of trials which reported no between-group difference                                                                                                                                             | Remarks                                                                                                               |
|-----------------------------------------------|---------------------------------------------------------------|----------------------------------|----------------------------------------------------------------------------------------------|---------------------------------------------------------------------------------------------------------------------------------------------------------------------------------------------------------|-----------------------------------------------------------------------------------------------------------------------|
| <b>Medication use</b>                         |                                                               |                                  |                                                                                              |                                                                                                                                                                                                         |                                                                                                                       |
| Use of antiplatelet or antithrombotic therapy | Aspirin only<br>Aspirin or clopidogrel<br>Aspirin or warfarin | 14                               | 7<br>(Ref 64, 65, 94, 125, 129, 130, 164)                                                    | 7<br>(Ref 45, 74, 117, 148, 155, 156, 168)<br>- Relatively high usage of this therapy at baseline: 41-90% (intervention group) versus 47-88% (control group)                                            | Not applicable                                                                                                        |
| Use of renin-angiotensin system inhibitors    | ACE inhibitors only<br>ARBs only<br>ACE inhibitors or ARBs    | 17                               | 10<br>(Ref 17, 64, 96, 124, 125, 129, 130, 136, 148, 164)                                    | 6<br>(Ref 15, 28, 45, 74, 95, 123)<br>- Relatively high usage of this therapy at baseline: 37.0-88.7% (intervention group) versus 37.0-88.5% (control group)                                            | 1 trial showed improved prescription with intervention but no results reported for the control group (Ref 168).       |
| Use of lipid lowering agents                  | Statin only<br>Statin, fibrate or ezetimibe                   | 22                               | 8<br>(Ref 17, 64, 65, 74, 124, 129, 136, 164)                                                | 12<br>(Ref 15, 28, 94, 104, 120, 122, 123, 125, 148, 155, 156, 160)<br>- 5 trials with relatively high usage of this therapy at baseline: 41-77% (intervention group) versus 38.0-81.3% (control group) | 2 trials showed improved prescription with intervention but no results reported for the control group (Ref 168, 170). |
| <b>Complications screening</b>                |                                                               |                                  |                                                                                              |                                                                                                                                                                                                         |                                                                                                                       |
| Nephropathy                                   | Albuminuria only<br>Albuminuria and/or serum creatinine       | 13                               | 8<br>(Ref 46, 130, 135, 138, 143, 156, 168, 177)                                             | 5<br>(Ref 35, 45, 125, 127, 144)<br>- 3 trials with relatively                                                                                                                                          | Not applicable                                                                                                        |



SUPPLEMENTARY DATA

| Care processes        | Definitions used in available trials                                                                                                                                                 | Total number of available trials | Number of trials which reported significant improvement with multi-component integrated care                                                                                                       | Number of trials which reported no between-group difference                                                                                                                                             | Remarks                                                                                                                                                                                                                                                                                |
|-----------------------|--------------------------------------------------------------------------------------------------------------------------------------------------------------------------------------|----------------------------------|----------------------------------------------------------------------------------------------------------------------------------------------------------------------------------------------------|---------------------------------------------------------------------------------------------------------------------------------------------------------------------------------------------------------|----------------------------------------------------------------------------------------------------------------------------------------------------------------------------------------------------------------------------------------------------------------------------------------|
|                       | <i>*Definition of screening intervals might differ.</i>                                                                                                                              |                                  |                                                                                                                                                                                                    | high screening rate at baseline: 41.2-79.9% (intervention group) versus 29.7-82.1% (control group)                                                                                                      |                                                                                                                                                                                                                                                                                        |
| Retinopathy           | Self-reported<br>Fundoscopy check<br>Dilated eye examination<br>Eye referral<br>Formal examination by ophthalmologist<br><br><i>*Definition of screening intervals might differ.</i> | 28                               | 13<br>(Ref 35, 45, 46, 61, 87, 115, 122, 135, 143, 150, 156, 171)<br>- 1 trial showed improved screening rate in the control group after cross-over (Ref 60, 61)                                   | 12<br>(Ref 125, 127, 130, 138, 144, 155, 167, 168, 169, 170, 177, 179)<br>- 5 trials with relatively high screening rate at baseline: 60.6-87.8% (intervention group) versus 61.0-83.9% (control group) | 1 trial did not report the <i>P</i> -value for between-group difference (Ref 14).<br><br>1 trial showed higher screening rate in the control versus intervention group (Ref 15).<br><br>1 trial reported lower screening rate in patients with low income versus high income (Ref 24). |
| Peripheral neuropathy | Self-inspection<br>Monofilament test<br>Formal examination by physicians or podiatrists<br><br><i>*Definition of screening intervals might differ.</i>                               | 29                               | 20<br>(Ref 14, 35, 46, 61, 69, 87, 115, 125, 135, 143, 144, 150, 167, 168, 169, 171, 178, 179, 180)<br>- 1 trial showed improved screening rate in the control group after cross-over (Ref 60, 61) | 9<br>(Ref 15, 45, 82, 122, 127, 130, 138, 170, 177)<br>- 3 trials with relatively high screening rate at baseline: 42.9-57.0% (intervention group) versus 40.5-65.5% (control group)                    | Not applicable                                                                                                                                                                                                                                                                         |

Footnotes: ACE, angiotensin converting enzyme; ARBs, angiotensin II receptor blockers. Only care process with at least five available trials was included.

SUPPLEMENTARY DATA

**Supplementary Table 6. Cardiometabolic effects of individual quality improvement strategy stratified by regions**

| Quality improvement strategy   | HbA <sub>1c</sub> (%)          |                           |        |                           |      |                           | HbA <sub>1c</sub> (mmol/mol)    |                        |        |                        |      |                         |
|--------------------------------|--------------------------------|---------------------------|--------|---------------------------|------|---------------------------|---------------------------------|------------------------|--------|------------------------|------|-------------------------|
|                                | North America                  |                           | Europe |                           | Asia |                           | North America                   |                        | Europe |                        | Asia |                         |
|                                | N                              | MD (95% CI)               | N      | MD (95% CI)               | N    | MD (95% CI)               | N                               | MD (95% CI)            | N      | MD (95% CI)            | N    | MD (95% CI)             |
| <b>Health system</b>           |                                |                           |        |                           |      |                           |                                 |                        |        |                        |      |                         |
| Case management                | 32                             | -0.30<br>(-0.41 to -0.19) | 14     | -0.10<br>(-0.17 to -0.03) | 3    | -0.28<br>(-0.50 to -0.05) | 32                              | -3.3<br>(-4.5 to -2.1) | 14     | -1.1<br>(-1.9 to -0.3) | 3    | -3.1<br>(-5.5 to -0.5)  |
| Team change                    | 22                             | -0.23<br>(-0.37 to -0.10) | 22     | -0.40<br>(-0.62 to -0.19) | 7    | -0.62<br>(-1.00 to -0.25) | 22                              | -2.5<br>(-4.0 to -1.1) | 22     | -4.4<br>(-6.8 to -2.1) | 7    | -6.8<br>(-10.9 to -2.7) |
| Electronic patient registry    | 3                              | -0.05<br>(-0.23 to 0.13)  | 3      | -0.08<br>(-0.14 to -0.02) | NA   | NA                        | 3                               | -0.5<br>(-2.5 to -1.4) | 3      | -0.9<br>(-1.5 to -0.2) | NA   | NA                      |
| Facilitated relay              | 27                             | -0.26<br>(-0.37 to -0.14) | 16     | -0.22<br>(-0.32 to -0.12) | 3    | -0.81<br>(-1.51 to -0.11) | 27                              | -2.8<br>(-4.0 to -1.5) | 16     | -2.4<br>(-3.5 to -1.3) | 3    | -8.9<br>(-16.5 to -1.2) |
| Electronic health              | 20                             | -0.21<br>(-0.32 to -0.11) | 10     | -0.09<br>(-0.17 to -0.01) | 4    | -0.29<br>(-0.48 to -0.10) | 20                              | -2.3<br>(-3.5 to -1.2) | 10     | -1.0<br>(-1.9 to -0.1) | 4    | -3.2<br>(-5.2 to -1.1)  |
| Continuous quality improvement | 9                              | -0.25<br>(-0.45 to -0.06) | 3      | -0.09<br>(-0.14 to -0.03) | 3    | -0.31<br>(-0.69 to 0.07)  | 9                               | -2.7<br>(-4.9 to -0.7) | 3      | -1.0<br>(-1.5 to -0.3) | 3    | -3.4<br>(-7.5 to -0.8)  |
| <b>Healthcare providers</b>    |                                |                           |        |                           |      |                           |                                 |                        |        |                        |      |                         |
| Audit and feedback             | 6                              | -0.15<br>(-0.32 to 0.03)  | 7      | -0.18<br>(-0.36 to 0.00)  | 3    | -0.28<br>(-0.50 to -0.05) | 6                               | -1.6<br>(-3.5 to -0.3) | 7      | -2.0<br>(-3.9 to 0.0)  | 3    | -3.1<br>(-5.5 to -0.5)  |
| Clinician education            | 7                              | -0.30<br>(-0.32 to -0.28) | 7      | -0.26<br>(-0.42 to -0.10) | NA   | NA                        | 7                               | -3.3<br>(-3.5 to -3.1) | 7      | -2.8<br>(-4.6 to -1.1) | NA   | NA                      |
| Clinician reminder             | 25                             | -0.19<br>(-0.31 to -0.08) | 16     | -0.21<br>(-0.34 to -0.07) | 3    | -0.36<br>(-0.53 to -0.19) | 25                              | -2.1<br>(-3.4 to -0.9) | 16     | -2.3<br>(-3.7 to -0.8) | 3    | -3.9<br>(-5.8 to -2.1)  |
| <b>Patients</b>                |                                |                           |        |                           |      |                           |                                 |                        |        |                        |      |                         |
| Patient education              | 18                             | -0.35<br>(-0.46 to -0.24) | 16     | -0.25<br>(-0.39 to -0.11) | 3    | -0.24<br>(-0.45 to -0.04) | 18                              | -3.8<br>(-5.0 to -2.6) | 16     | -2.7<br>(-4.3 to -1.2) | 3    | -2.6<br>(-4.9 to -0.4)  |
| Promotion of self-management   | 32                             | -0.26<br>(-0.37 to -0.15) | 24     | -0.31<br>(-0.47 to -0.14) | 5    | -0.54<br>(-0.80 to -0.28) | 32                              | -2.8<br>(-4.0 to -1.6) | 24     | -3.4<br>(-5.1 to -1.5) | 5    | -5.9<br>(-8.7 to -3.1)  |
| Patient reminder system        | 31                             | -0.23<br>(-0.33 to -0.13) | 16     | -0.16<br>(-0.26 to -0.06) | 8    | -0.57<br>(-0.91 to -0.24) | 31                              | -2.5<br>(-3.6 to -1.4) | 16     | -1.7<br>(-2.8 to -0.7) | 8    | -6.2<br>(-9.9 to -2.6)  |
| Quality improvement strategy   | Systolic blood pressure (mmHg) |                           |        |                           |      |                           | Diastolic blood pressure (mmHg) |                        |        |                        |      |                         |
|                                | North America                  |                           | Europe |                           | Asia |                           | North America                   |                        | Europe |                        | Asia |                         |
|                                | N                              | MD (95% CI)               | N      | MD (95% CI)               | N    | MD (95% CI)               | N                               | MD (95% CI)            | N      | MD (95% CI)            | N    | MD (95% CI)             |
| <b>Health system</b>           |                                |                           |        |                           |      |                           |                                 |                        |        |                        |      |                         |
| Case management                | 19                             | -2.9<br>(-4.5 to -1.2)    | 13     | -1.4<br>(-3.0 to 0.2)     | 5    | -3.1<br>(-5.1 to -1.0)    | 17                              | -1.5<br>(-2.5 to -0.5) | 12     | -0.7<br>(-1.8 to 0.4)  | 5    | -1.9<br>(-3.2 to -0.5)  |
| Team change                    | 15                             | -1.9                      | 20     | -3.5                      | 7    | -2.9                      | 13                              | -1.2                   | 20     | -1.5                   | 6    | -1.2                    |

SUPPLEMENTARY DATA

|                                     |                        |                           |               |                           |          |                           |    |                        |    |                        |    |                        |  |
|-------------------------------------|------------------------|---------------------------|---------------|---------------------------|----------|---------------------------|----|------------------------|----|------------------------|----|------------------------|--|
|                                     |                        | (-3.4 to -0.3)            |               | (-5.2 to -1.7)            |          | (-5.0 to -0.9)            |    | (-2.3 to -0.2)         |    | (-2.4 to -0.5)         |    | (-2.4 to 0.0)          |  |
| Electronic patient registry         | 4                      | -4.7<br>(-9.8 to 0.5)     | 3             | -4.3<br>(-7.1 to -1.6)    | 2        | -4.0<br>(-8.2 to 0.2)     | 3  | -3.5<br>(-7.4 to 0.3)  | 3  | -3.3<br>(-5.6 to -1.0) | 2  | -3.1<br>(-4.7 to -1.6) |  |
| Facilitated relay                   | 18                     | -2.4<br>(-4.1 to -0.7)    | 12            | -3.0<br>(-5.6 to -0.4)    | 3        | -5.1<br>(-8.5 to -1.6)    | 16 | -1.4<br>(-2.4 to -0.4) | 12 | -1.6<br>(-2.8 to -0.4) | 2  | -1.4<br>(-3.9 to 1.2)  |  |
| Electronic health                   | 15                     | -2.1<br>(-4.1 to -0.2)    | 6             | -1.5<br>(-4.4 to 1.4)     | 5        | -3.5<br>(-6.0 to -1.0)    | 13 | -1.7<br>(-2.8 to -0.7) | 6  | -1.2<br>(-3.3 to 0.9)  | 5  | -1.8<br>(-3.3 to -0.4) |  |
| Continuous quality improvement      | 5                      | -4.0<br>(-6.7 to -1.3)    | 3             | -3.1<br>(-7.8 to 1.6)     | 3        | 0.0<br>(-2.1 to 2.0)      | 5  | -1.5<br>(-2.9 to 0.0)  | 3  | -1.8<br>(-5.1 to 1.6)  | 3  | 0.1<br>(-1.3 to 1.6)   |  |
| <b>Healthcare providers</b>         |                        |                           |               |                           |          |                           |    |                        |    |                        |    |                        |  |
| Audit and feedback                  | 5                      | -2.4<br>(-4.1 to -0.8)    | 6             | -3.2<br>(-8.0 to 1.7)     | 3        | -3.3<br>(-6.4 to -0.1)    | 5  | -1.3<br>(-2.3 to -0.2) | 6  | -1.7<br>(-3.9 to 0.5)  | 3  | -1.8<br>(-3.7 to 0.0)  |  |
| Clinician education                 | 4                      | -1.3<br>(-4.5 to 2.0)     | 7             | -2.3<br>(-5.6 to 1.1)     | NA       | NA                        | 3  | -0.7<br>(-3.3 to 1.8)  | 7  | -1.1<br>(-2.8 to 0.6)  | NA | NA                     |  |
| Clinician reminder                  | 15                     | -2.6<br>(-4.7 to -0.6)    | 15            | -1.9<br>(-3.8 to 0.0)     | 2        | -5.2<br>(-7.9 to -2.5)    | 14 | -1.3<br>(-2.4 to -0.2) | 15 | -0.6<br>(-1.6 to 0.4)  | 2  | -2.9<br>(-4.5 to -1.4) |  |
| <b>Patients</b>                     |                        |                           |               |                           |          |                           |    |                        |    |                        |    |                        |  |
| Patient education                   | 8                      | -4.7<br>(-6.8 to -2.5)    | 18            | -3.2<br>(-5.3 to -1.1)    | 4        | -2.7<br>(-5.3 to -0.1)    | 7  | -2.6<br>(-3.8 to -1.4) | 18 | -1.2<br>(-2.2 to -0.2) | 4  | -2.2<br>(-4.0 to -0.4) |  |
| Promotion of self-management        | 17                     | -3.3<br>(-5.1 to -1.6)    | 20            | -3.4<br>(-5.1 to -1.6)    | 6        | -3.0<br>(-5.6 to -0.4)    | 15 | -1.8<br>(-2.8 to -0.7) | 20 | -1.6<br>(-2.5 to -0.7) | 6  | -1.7<br>(-3.2 to -0.2) |  |
| Patient reminder system             | 17                     | -2.4<br>(-4.0 to -0.8)    | 11            | -2.1<br>(-4.6 to 0.5)     | 7        | -3.6<br>(-5.4 to -1.7)    | 14 | -1.2<br>(-2.3 to -0.1) | 21 | -1.2<br>(-2.5 to 0.2)  | 6  | -1.5<br>(-2.7 to -0.4) |  |
| <b>Quality improvement strategy</b> | <b>LDL-C (mmol/L)*</b> |                           |               |                           |          |                           |    |                        |    |                        |    |                        |  |
|                                     | <b>North America</b>   |                           | <b>Europe</b> |                           |          | <b>Asia</b>               |    |                        |    |                        |    |                        |  |
|                                     | <b>N</b>               | <b>MD (95% CI)</b>        | <b>N</b>      | <b>MD (95% CI)</b>        | <b>N</b> | <b>MD (95% CI)</b>        |    |                        |    |                        |    |                        |  |
| <b>Health system</b>                |                        |                           |               |                           |          |                           |    |                        |    |                        |    |                        |  |
| Case management                     | 16                     | -0.08<br>(-0.16 to 0.00)  | 8             | -0.06<br>(-0.18 to 0.05)  | 2        | -0.25<br>(-0.48 to -0.02) |    |                        |    |                        |    |                        |  |
| Team change                         | 8                      | -0.17<br>(-0.30 to -0.05) | 14            | -0.24<br>(-0.39 to -0.09) | 5        | -0.15<br>(-0.39 to 0.09)  |    |                        |    |                        |    |                        |  |
| Electronic patient registry         | NA                     | NA                        | 3             | -0.20<br>(-0.26 to -0.14) | NA       | NA                        |    |                        |    |                        |    |                        |  |
| Facilitated relay                   | 15                     | -0.10<br>(-0.19 to -0.01) | 10            | -0.15<br>(-0.27 to -0.04) | 3        | -0.40<br>(-0.70 to -0.11) |    |                        |    |                        |    |                        |  |
| Electronic health                   | 11                     | -0.06<br>(-0.12 to -0.01) | 6             | -0.12<br>(-0.26 to 0.02)  | 3        | -0.20<br>(-0.31 to -0.09) |    |                        |    |                        |    |                        |  |
| Continuous quality                  | 2                      | -0.14<br>(-0.46 to 0.17)  | 2             | -0.20<br>(-0.26 to -0.14) | 3        | -0.05<br>(-0.32 to 0.21)  |    |                        |    |                        |    |                        |  |

SUPPLEMENTARY DATA

|                              |    |                           |    |                           |    |                           |  |  |  |  |  |  |
|------------------------------|----|---------------------------|----|---------------------------|----|---------------------------|--|--|--|--|--|--|
| improvement                  |    |                           |    |                           |    |                           |  |  |  |  |  |  |
| <b>Healthcare providers</b>  |    |                           |    |                           |    |                           |  |  |  |  |  |  |
| Audit and feedback           | 4  | -0.04<br>(-0.12 to 0.05)  | 4  | -0.17<br>(-0.43 to 0.09)  | 2  | -0.25<br>(-0.48 to -0.02) |  |  |  |  |  |  |
| Clinician education          | NA | NA                        | 4  | -0.16<br>(-0.38 to 0.05)  | NA | NA                        |  |  |  |  |  |  |
| Clinician reminder           | 9  | -0.11<br>(-0.23 to 0.01)  | 11 | -0.14<br>(-0.32 to 0.04)  | 3  | -0.19<br>(-0.28 to -0.09) |  |  |  |  |  |  |
| <b>Patients</b>              |    |                           |    |                           |    |                           |  |  |  |  |  |  |
| Patient education            | 7  | -0.05<br>(-0.12 to 0.03)  | 10 | -0.30<br>(-0.48 to -0.12) | 2  | -0.09<br>(-0.34 to 0.17)  |  |  |  |  |  |  |
| Promotion of self-management | 12 | -0.11<br>(-0.20 to -0.02) | 16 | -0.24<br>(-0.37 to -0.10) | 4  | -0.05<br>(-0.21 to 0.11)  |  |  |  |  |  |  |
| Patient reminder system      | 10 | -0.10<br>(-0.21 to 0.01)  | 7  | -0.09<br>(-0.24 to 0.05)  | 6  | -0.23<br>(-0.40 to -0.06) |  |  |  |  |  |  |

Footnotes: HbA<sub>1c</sub>, glycated hemoglobin; LDL-C, low-density lipoprotein cholesterol; MD (95% CI), mean difference (95% confidence interval); N, number of trials with analysable data; NA, no available analysable data. \*To convert LDL-C to mg/dL, multiply by 38.67.

SUPPLEMENTARY DATA

**Supplementary Table 7. Meta-regression analysis of the cardiometabolic effects of individual quality improvement strategy**

| Quality improvement strategy   | HbA <sub>1c</sub> (%; 75 trials)           |                        |         | HbA <sub>1c</sub> (mmol/L; 75 trials) |                       |         | Systolic blood pressure (mmHg; 54 trials) |                     |         |
|--------------------------------|--------------------------------------------|------------------------|---------|---------------------------------------|-----------------------|---------|-------------------------------------------|---------------------|---------|
|                                | N                                          | MD (95% CI)            | P-value | N                                     | MD (95% CI)           | P-value | N                                         | MD (95% CI)         | P-value |
| <b>Health system</b>           |                                            |                        |         |                                       |                       |         |                                           |                     |         |
| Case management                | 47                                         | -0.06 (-0.18 to 0.07)  | 0.398   | 47                                    | -0.7 (-2.0 to -0.8)   | 0.398   | 33                                        | 0.4 (-2.0 to 2.9)   | 0.724   |
| Team change                    | 40                                         | -0.12 (-0.25 to 0.02)  | 0.083   | 40                                    | -1.3 (-2.7 to 0.2)    | 0.083   | 32                                        | 1.6 (-1.1 to 4.3)   | 0.243   |
| Electronic patient registry    | 7                                          | 0.14 (-0.11 to 0.39)   | 0.263   | 7                                     | 1.5 (-1.2 to 4.3)     | 0.263   | 8                                         | -4.4 (-8.0 to -0.8) | 0.016   |
| Facilitated relay              | 35                                         | -0.14 (-0.28 to 0.01)  | 0.059   | 35                                    | -1.5 (-3.1 to 0.1)    | 0.059   | 26                                        | -2.3 (-4.6 to 0.1)  | 0.057   |
| Electronic health              | 30                                         | 0.04 (-0.11 to 0.20)   | 0.585   | 30                                    | 0.4 (-1.2 to 2.2)     | 0.585   | 20                                        | 4.8 (1.5 to 8.1)    | 0.004   |
| Continuous quality improvement | 16                                         | 0.06 (-0.09 to 0.21)   | 0.446   | 16                                    | 0.7 (-1.0 to 2.3)     | 0.446   | 13                                        | 1.1 (-1.2 to 3.5)   | 0.346   |
| <b>Healthcare providers</b>    |                                            |                        |         |                                       |                       |         |                                           |                     |         |
| Audit and feedback             | 13                                         | -0.01 (-0.18 to 0.16)  | 0.927   | 13                                    | -0.1 (-2.0 to 1.7)    | 0.927   | 10                                        | -2.3 (-5.7 to 1.1)  | 0.184   |
| Clinician education            | 10                                         | 0.04 (-0.14 to 0.22)   | 0.657   | 10                                    | 0.4 (-1.5 to 2.4)     | 0.657   | 8                                         | 0.5 (-2.9 to 3.9)   | 0.763   |
| Clinician reminder             | 37                                         | 0.01 (-0.11 to 0.14)   | 0.840   | 37                                    | 0.1 (-1.2 to 1.5)     | 0.840   | 26                                        | 0.3 (-1.9 to 2.6)   | 0.775   |
| <b>Patients</b>                |                                            |                        |         |                                       |                       |         |                                           |                     |         |
| Patient education              | 31                                         | -0.15 (-0.28 to -0.02) | 0.019   | 31                                    | -1.6 (-3.1 to -0.2)   | 0.019   | 24                                        | 0.8 (-1.6 to 3.2)   | 0.516   |
| Promotion of self-management   | 51                                         | 0.05 (-0.10 to 0.20)   | 0.474   | 51                                    | 0.5 (-1.1 to 2.2)     | 0.474   | 38                                        | -4.7 (-7.8 to -1.6) | 0.003   |
| Patient reminder system        | 45                                         | 0.10 (-0.04 to 0.25)   | 0.170   | 45                                    | 1.1 (-0.4 to 2.7)     | 0.170   | 27                                        | 0.3 (-2.1 to 2.7)   | 0.809   |
| Quality improvement strategy   | Diastolic blood pressure (mmHg; 51 trials) |                        |         | LDL-C (mmol/L; 38 trials)*            |                       |         |                                           |                     |         |
|                                | N                                          | MD (95% CI)            | P-value | N                                     | MD (95% CI)           | P-value |                                           |                     |         |
| <b>Health system</b>           |                                            |                        |         |                                       |                       |         |                                           |                     |         |
| Case management                | 31                                         | -0.3 (-1.5 to 0.8)     | 0.576   | 23                                    | 0.04 (-0.16 to 0.23)  | 0.717   |                                           |                     |         |
| Team change                    | 31                                         | 0.7 (-0.6 to 2.0)      | 0.292   | 24                                    | -0.21 (-0.44 to 0.02) | 0.070   |                                           |                     |         |
| Electronic patient registry    | 8                                          | -2.7 (-4.5 to -0.8)    | 0.004   | 5                                     | 0.21 (-0.11 to 0.53)  | 0.196   |                                           |                     |         |
| Facilitated relay              | 24                                         | -0.4 (-1.6 to 0.8)     | 0.469   | 23                                    | -0.07 (-0.27 to 0.14) | 0.526   |                                           |                     |         |
| Electronic health              | 19                                         | 1.3 (-0.3 to 3.0)      | 0.118   | 17                                    | -0.12 (-0.40 to 0.16) | 0.394   |                                           |                     |         |
| Continuous quality improvement | 13                                         | 1.1 (-0.1 to 2.3)      | 0.073   | 8                                     | -0.01 (-0.21 to 0.18) | 0.906   |                                           |                     |         |
| <b>Healthcare providers</b>    |                                            |                        |         |                                       |                       |         |                                           |                     |         |
| Audit and feedback             | 10                                         | -1.2 (-2.7 to 0.3)     | 0.125   | 9                                     | -0.11 (-0.41 to 0.19) | 0.472   |                                           |                     |         |
| Clinician education            | 8                                          | -0.9 (-2.5 to 0.7)     | 0.260   | 5                                     | -0.18 (-0.47 to 0.11) | 0.219   |                                           |                     |         |
| Clinician reminder             | 26                                         | 1.0 (-0.1 to 2.1)      | 0.085   | 20                                    | -0.05 (-0.21 to 0.11) | 0.535   |                                           |                     |         |
| <b>Patients</b>                |                                            |                        |         |                                       |                       |         |                                           |                     |         |
| Patient education              | 24                                         | -0.6 (-1.7 to 0.5)     | 0.269   | 16                                    | -0.05 (-0.33 to 0.24) | 0.754   |                                           |                     |         |
| Promotion of self-management   | 37                                         | -2.2 (-3.8 to -0.7)    | 0.004   | 27                                    | 0.06 (-0.25 to 0.37)  | 0.714   |                                           |                     |         |
| Patient reminder system        | 25                                         | 0.5 (-0.8 to 1.7)      | 0.461   | 20                                    | 0.16 (-0.03 to 0.35)  | 0.104   |                                           |                     |         |

Footnotes: The meta-regression analyses were adjusted for age, sex, and the respective HbA<sub>1c</sub>, systolic blood pressure, diastolic blood pressure, or LDL-cholesterol at baseline. BP, blood pressure; HbA<sub>1c</sub>, glycated hemoglobin; LDL-C, low-density lipoprotein cholesterol; MD (95% CI), mean difference (95% confidence interval). \*To convert LDL-C to mg/dL, multiply by 38.67.

SUPPLEMENTARY DATA

**Supplementary Table 8. Comparison of two meta-analyses**

| Characteristics                                                                | Tricco et al                                                                                                                                                                                                                                                                                                                                  | Present meta-analysis                                                                                                                                                                                                                                                                                        |
|--------------------------------------------------------------------------------|-----------------------------------------------------------------------------------------------------------------------------------------------------------------------------------------------------------------------------------------------------------------------------------------------------------------------------------------------|--------------------------------------------------------------------------------------------------------------------------------------------------------------------------------------------------------------------------------------------------------------------------------------------------------------|
| <b>Database search</b>                                                         | Medline, Cochrane EPOC, cross-references                                                                                                                                                                                                                                                                                                      | PubMed, Ovid MEDLINE, cross-references                                                                                                                                                                                                                                                                       |
| <b>Inclusion criteria</b>                                                      |                                                                                                                                                                                                                                                                                                                                               |                                                                                                                                                                                                                                                                                                              |
| Type of study                                                                  | Randomized controlled trials                                                                                                                                                                                                                                                                                                                  | Randomized controlled trials and their companion prospective follow-up studies (if available)                                                                                                                                                                                                                |
| Year of literature search                                                      | July 2003 (last date of previous review) till July 2010                                                                                                                                                                                                                                                                                       | January 2000 till August 2016                                                                                                                                                                                                                                                                                |
| Type of diabetes                                                               | T1D only, T2D only or combined T1D and T2D<br>(a) Combined<br>T1D and T2D: 34<br>(b) T1D only: 9<br>(c) Not reported:<br>19                                                                                                                                                                                                                   | T2D only<br>(a) Combined T1D<br>and T2D: 7<br>(b) T2D and other<br>unspecified types of diabetes in the same trial: 10                                                                                                                                                                                       |
| Type of outcomes                                                               | (a) At least one<br>care process measure (aspirin, statin or<br>antihypertensive use, microvascular<br>complications screening), <b>OR</b><br>(b) At least one<br>intermediate outcome (HbA <sub>1c</sub> /BP/lipid levels,<br>proportion of patients attaining target<br>HbA <sub>1c</sub> /controlled hypertension or smoking<br>cessation) | (a) At least one<br>cardiometabolic or care process outcome, <b>OR</b><br>(b) At least one<br>cardiometabolic or care process outcome <b>AND</b><br>patient-reported outcomes, healthcare utilization,<br>economic, or cardiovascular risk (either reported<br>simultaneously or in separate publication[s]) |
| Duration of intervention                                                       | Not specified                                                                                                                                                                                                                                                                                                                                 | At least 12 months                                                                                                                                                                                                                                                                                           |
| Number of intervention domains (health system, healthcare providers, patients) | Not specified                                                                                                                                                                                                                                                                                                                                 | At least two domains                                                                                                                                                                                                                                                                                         |
| Number of participants per trial                                               | Not specified                                                                                                                                                                                                                                                                                                                                 | At least 100 adults                                                                                                                                                                                                                                                                                          |
| Language of publication                                                        | English only                                                                                                                                                                                                                                                                                                                                  | English only                                                                                                                                                                                                                                                                                                 |
| <b>Exclusion criteria</b>                                                      |                                                                                                                                                                                                                                                                                                                                               |                                                                                                                                                                                                                                                                                                              |
| Type of diabetes                                                               | Not specified                                                                                                                                                                                                                                                                                                                                 | T1D only, diabetes in pregnancy/adolescent/inpatients                                                                                                                                                                                                                                                        |
| Type of intervention domain excluded                                           | Patient-level                                                                                                                                                                                                                                                                                                                                 | Single domain                                                                                                                                                                                                                                                                                                |
| <b>Number of publications</b>                                                  |                                                                                                                                                                                                                                                                                                                                               |                                                                                                                                                                                                                                                                                                              |
| Total included                                                                 | 142                                                                                                                                                                                                                                                                                                                                           | 181                                                                                                                                                                                                                                                                                                          |
| Cluster randomized controlled trials                                           | 48                                                                                                                                                                                                                                                                                                                                            | 89 (5 companion prospective follow-up studies)                                                                                                                                                                                                                                                               |
| Patient randomized controlled trials                                           | 94                                                                                                                                                                                                                                                                                                                                            | 92 (7 companion prospective follow-up studies)                                                                                                                                                                                                                                                               |
| Inception till December 1999                                                   | 23                                                                                                                                                                                                                                                                                                                                            | Excluded                                                                                                                                                                                                                                                                                                     |
| January 2000 till 2010                                                         | 119                                                                                                                                                                                                                                                                                                                                           | 91 (one was in 1999 – first report of Steno-2 study)                                                                                                                                                                                                                                                         |
| 2010 till August 2016                                                          | Excluded                                                                                                                                                                                                                                                                                                                                      | 90                                                                                                                                                                                                                                                                                                           |
| Trials included in both meta-analyses                                          | 60                                                                                                                                                                                                                                                                                                                                            | 60                                                                                                                                                                                                                                                                                                           |
| Trials fulfilled our criteria but not included                                 | 12                                                                                                                                                                                                                                                                                                                                            | 12                                                                                                                                                                                                                                                                                                           |

SUPPLEMENTARY DATA

|                                                                   |                                    |                                                                                                                                                                          |
|-------------------------------------------------------------------|------------------------------------|--------------------------------------------------------------------------------------------------------------------------------------------------------------------------|
| (reasons)                                                         |                                    | (a) Unknown type<br>of diabetes: 2<br>(b) Full text was<br>not available: 1<br>(c) Year of<br>publication: 1984 (1), 1993 (2), 1995 (1),<br>1996 (1), 1998 (2), 1999 (2) |
| Trials with at least two intervention arms                        | 10                                 | 28                                                                                                                                                                       |
| <b>Number of participants</b>                                     | 123,569                            | 135,112                                                                                                                                                                  |
| <b>Number of quality improvement strategies defined a priori</b>  | 12                                 | 13 (updated the definitions and added electronic health)                                                                                                                 |
| <b>Findings versus usual care (MD [95% CI]; number of trials)</b> |                                    |                                                                                                                                                                          |
| HbA <sub>1c</sub> (%)                                             | -0.37 (-0.45 to -0.28); 120 trials | -0.28 (-0.35 to -0.21); 99 trials                                                                                                                                        |
| HbA <sub>1c</sub> (mmol/mol)                                      | -4.0 (-4.9 to -3.1); 120 trials    | -3.1 (-3.9 to -2.3); 99 trials                                                                                                                                           |
| Systolic blood pressure (mmHg)                                    | -3.13 (-4.06 to -2.19); 65 trials  | -2.3 (-3.1 to -1.4); 73 trials                                                                                                                                           |
| Diastolic blood pressure (mmHg)                                   | -1.55 (-2.15 to -0.95); 61 trials  | -1.1 (-1.5 to -0.6); 68 trials                                                                                                                                           |
| LDL-C (mmol/L)*                                                   | -0.10 (-0.14 to -0.05); 47 trials  | -0.14 (-0.21 to -0.07); 48 trials                                                                                                                                        |

Footnotes: HbA<sub>1c</sub>, glycated hemoglobin; LDL-C, low-density lipoprotein cholesterol; MD (95% CI), mean difference (95% confidence intervals); T1D, type 1 diabetes; T2D, type 2 diabetes. \*To convert LDL-C to mg/dL, multiply by 38.67.

SUPPLEMENTARY DATA

**Supplementary Table 9. Education programs and other characteristics of trials included in the meta-analysis**

| Study setting                                     | Country               | Study population                                                                                                                                                  | Age*                                | Female gender (%) | Socio-economic & education status                                           | Base-line HbA <sub>1c</sub> <sup>a</sup>                                             | DM duration <sup>b</sup>                  | Personnel involved (overall)                               | Frequency & duration of patient/personnel training                                                                                                                                                                                                                                    | Patients per group                                             | Curriculum                                                                                                            | Quality assurance | Attendance rates/intensity                                                           |
|---------------------------------------------------|-----------------------|-------------------------------------------------------------------------------------------------------------------------------------------------------------------|-------------------------------------|-------------------|-----------------------------------------------------------------------------|--------------------------------------------------------------------------------------|-------------------------------------------|------------------------------------------------------------|---------------------------------------------------------------------------------------------------------------------------------------------------------------------------------------------------------------------------------------------------------------------------------------|----------------------------------------------------------------|-----------------------------------------------------------------------------------------------------------------------|-------------------|--------------------------------------------------------------------------------------|
| <b>Tutino 2016(1)</b>                             |                       |                                                                                                                                                                   |                                     |                   |                                                                             |                                                                                      |                                           |                                                            |                                                                                                                                                                                                                                                                                       |                                                                |                                                                                                                       |                   |                                                                                      |
| 6 tertiary hospitals (under funded health system) | China                 | 3586 (urban T2D; >80% in high risk category)<br>Active: 1858<br>Control: 1728                                                                                     | 56.5 (11.6)                         | 45.6              | Unemployed: 63.1%<br><br>≤ 11 years of education: 32.2%                     | 7.85 (2.02)                                                                          | Median (IQR) : 5 (1.0 to 10.0)            | Trio team (diabetologists, nurses, health care assistants) | Patient education (12 months):<br>2-4 hours in groups or on an individual basis as appropriate. At least 2 additional contacts by nurse (telephone or face-to-face visits)<br>→ Low risk categories: every 4-6 months follow up<br>→ High risk categories: every 2-3 months follow up | 6 patients each group                                          | Risk factors, hypoglycemia, SMBG, adherence to medications & lifestyle                                                | NA                | 71.4% returned for 2 <sup>nd</sup> comprehensive assessment after 12.5 months (JADE) |
| <b>Hayashino 2016(2)</b>                          |                       |                                                                                                                                                                   |                                     |                   |                                                                             |                                                                                      |                                           |                                                            |                                                                                                                                                                                                                                                                                       |                                                                |                                                                                                                       |                   |                                                                                      |
| 22 urban primary care clusters                    | 11 districts, Japan   | 2199<br>Active: 971<br>Control: 1265                                                                                                                              | 56.5 (5.9)                          | 37.5              | NA                                                                          | 7.4 (1.2)                                                                            | NA                                        | PCPs, CDE, PN, dietitians                                  | Patient education (12 months):<br>6 sessions of phone call on lifestyle advice (15–30 min each), or 4 sessions of face-to-face advice (30 min each)                                                                                                                                   | Individual                                                     | lifestyle changes                                                                                                     | NA                | NA                                                                                   |
| <b>Ali 2016(3)</b>                                |                       |                                                                                                                                                                   |                                     |                   |                                                                             |                                                                                      |                                           |                                                            |                                                                                                                                                                                                                                                                                       |                                                                |                                                                                                                       |                   |                                                                                      |
| 10 out-patient clinics                            | India, Pakistan       | 1146 (HbA <sub>1c</sub> ≥8.0% & SBP ≥140 mmHg with/without LDL ≥3.4 mmol/L)<br>Active: 575<br>Control: 571                                                        | 54.2 (9.2)                          | 54.1              | Low income (<US\$400 per month): 66.4%<br><br><high school education: 29.9% | 9.9 (1.5) vs 9.9 (1.7)                                                               | Median (IQR) : 7 (3 to 13) vs 7 (3 to 12) | Physicians, nurses, dietitians, social workers             | Patient education (2.5 years):<br>every 3-monthly follow up & at least monthly phone contact                                                                                                                                                                                          | Individual & group (50-80 intervention group per care manager) | DM self-management, lifestyle adherence, smoking cessation, medication use, SMBG (if on insulin) & stress management. | NA                | NA                                                                                   |
| <b>Dario 2016(4)</b>                              |                       |                                                                                                                                                                   |                                     |                   |                                                                             |                                                                                      |                                           |                                                            |                                                                                                                                                                                                                                                                                       |                                                                |                                                                                                                       |                   |                                                                                      |
| Local health authority                            | Alto Vicentino, Italy | 299 (HbA <sub>1c</sub> >7.0%; >50% had CHD)<br>Active: 208<br>Control: 91                                                                                         | 73.0                                | 43.8              | Retired: 54.5%<br><br><High school education: 88.0%                         | 7.94 (0.98) vs 7.93 (1.10)                                                           | 15.01 (10.2 4) vs 16.01 (9.84)            | Physicians, health centre operator                         | Patient education (12 months):<br>Not specified                                                                                                                                                                                                                                       | NA                                                             | NA                                                                                                                    | NA                | NA                                                                                   |
| <b>Krag 2016(5)</b>                               |                       |                                                                                                                                                                   |                                     |                   |                                                                             |                                                                                      |                                           |                                                            |                                                                                                                                                                                                                                                                                       |                                                                |                                                                                                                       |                   |                                                                                      |
| 311 primary care practices                        | Denmark               | 1381 (97.5% newly diagnosed T2D; 99.1% Western Europeans)<br>Active: 761<br>Control: 620<br><br>970 (followed up for 13 years after intervention)<br>Post-active: | 66.7-70.1 after 6-year intervention | 49.3              | NA                                                                          | M: 8.8 (1.7) vs 9.0 (1.6)<br><br>F: 8.6 (1.3) vs 9.4 (1.9) after 6-year intervention | 19 years follow up from baseline          | PCPs                                                       | Patient education (6 years):<br>every 3-monthly visit with GPs; 4 leaflets                                                                                                                                                                                                            | NA                                                             | Physical exercise, dietary compliance, goal-setting, target attainment                                                | NA                | NA                                                                                   |



SUPPLEMENTARY DATA

| Study setting              | Country           | Study population                                                                    | Age*                                                     | Female gender (%) | Socio-economic & education status                                        | Base-line HbA <sub>1c</sub> <sup>a</sup>               | DM duration <sup>a</sup>                 | Personnel involved (overall)                                       | Frequency & duration of patient/personnel training                                                                                                                                            | Patients per group       | Curriculum                                                                                                                                                                                                                                                                              | Quality assurance                                                                                                          | Attendance rates/intensity                                                                                                                                                     |
|----------------------------|-------------------|-------------------------------------------------------------------------------------|----------------------------------------------------------|-------------------|--------------------------------------------------------------------------|--------------------------------------------------------|------------------------------------------|--------------------------------------------------------------------|-----------------------------------------------------------------------------------------------------------------------------------------------------------------------------------------------|--------------------------|-----------------------------------------------------------------------------------------------------------------------------------------------------------------------------------------------------------------------------------------------------------------------------------------|----------------------------------------------------------------------------------------------------------------------------|--------------------------------------------------------------------------------------------------------------------------------------------------------------------------------|
|                            |                   | 549 Post-control: 421                                                               |                                                          |                   |                                                                          |                                                        |                                          |                                                                    |                                                                                                                                                                                               |                          |                                                                                                                                                                                                                                                                                         |                                                                                                                            |                                                                                                                                                                                |
| <b>Lundström 2014(6)</b>   |                   |                                                                                     |                                                          |                   |                                                                          |                                                        |                                          |                                                                    |                                                                                                                                                                                               |                          |                                                                                                                                                                                                                                                                                         |                                                                                                                            |                                                                                                                                                                                |
| 311 primary care practices | Denmark           | 1381 (97.5% newly diagnosed T2D; 99.1% Western Europeans) Active: 761 Control: 620  | Median (IQR): 65.4 (55.7 to 73.6)                        | 46.9              | NA                                                                       | Median (IQR): 10.2 (8.6 to 11.6) vs 10.2 (8.7 to 11.9) | 19 years follow up from base-line        | PCPs                                                               | <u>Patient education (6 years):</u> every 3-monthly visit with GPs; 4 leaflets                                                                                                                | NA                       | Physical exercise, dietary compliance, goal-setting, target attainment                                                                                                                                                                                                                  | NA                                                                                                                         | NA                                                                                                                                                                             |
| <b>Hansen 2013(7)</b>      |                   |                                                                                     |                                                          |                   |                                                                          |                                                        |                                          |                                                                    |                                                                                                                                                                                               |                          |                                                                                                                                                                                                                                                                                         |                                                                                                                            |                                                                                                                                                                                |
| 311 primary care practices | Denmark           | 1,381 (97.5% newly diagnosed T2D; 99.1% Western Europeans) Active: 761 Control: 620 | Median (IQR): 65.4 (55.7 to 73.6)                        | 46.9              | NA                                                                       | Median (IQR): 10.2 (8.6 to 11.6) vs 10.2 (8.7 to 11.9) | 6- & 14-year follow up from base-line    | PCPs                                                               | <u>Patient education (6 years):</u> every 3-monthly visit with GPs; 4 leaflets                                                                                                                | NA                       | Physical exercise, dietary compliance, goal-setting, target attainment                                                                                                                                                                                                                  | NA                                                                                                                         | NA                                                                                                                                                                             |
| <b>Nielsen 2006(8)</b>     |                   |                                                                                     |                                                          |                   |                                                                          |                                                        |                                          |                                                                    |                                                                                                                                                                                               |                          |                                                                                                                                                                                                                                                                                         |                                                                                                                            |                                                                                                                                                                                |
| 311 primary care practices | Denmark           | 874 (newly diagnosed T2D; >1/3 were current smoker) Active: 459 Control: 415        | Median (IQR): 63.0 (53.8 to 71.4)                        | 49.5              | <u>Salaried employees:</u> 28.0%<br><u>Basic school education:</u> 78.4% | Median (IQR): 10.2 (8.6 to 11.6) vs 10.2 (8.7 to 11.9) | 5.5-6.0 years after 6-year intervention  | PCPs                                                               | <u>Patient education (6 years):</u> every 3-monthly visit with GPs; 4 leaflets                                                                                                                | NA                       | Physical exercise, dietary compliance, goal-setting, target attainment                                                                                                                                                                                                                  | NA                                                                                                                         | NA                                                                                                                                                                             |
| <b>Olivarius 2001(9)</b>   |                   |                                                                                     |                                                          |                   |                                                                          |                                                        |                                          |                                                                    |                                                                                                                                                                                               |                          |                                                                                                                                                                                                                                                                                         |                                                                                                                            |                                                                                                                                                                                |
| 311 primary care practices | Denmark           | 1263 (newly diagnosed T2D; >1/3 were current smoker) Active: 649 Control: 614       | Median (IQR): 65.5 (55.3 to 74.0) vs 65.3 (56.3 to 73.5) | 47.3              | <u>Salaried employees:</u> 28.0%<br><u>Basic school education:</u> 78.4% | Median (IQR): 10.2 (8.6 to 11.6) vs 10.2 (8.7 to 11.9) | ≈5.5-6.0 (at end of 6-year intervention) | PCPs                                                               | <u>Patient education (6 years):</u> every 3-monthly visit with GPs; 4 leaflets                                                                                                                | NA                       | Physical exercise, dietary compliance, goal-setting, target attainment                                                                                                                                                                                                                  | NA                                                                                                                         | NA                                                                                                                                                                             |
| <b>Johansson 2016(10)</b>  |                   |                                                                                     |                                                          |                   |                                                                          |                                                        |                                          |                                                                    |                                                                                                                                                                                               |                          |                                                                                                                                                                                                                                                                                         |                                                                                                                            |                                                                                                                                                                                |
| 39 general practices       | Salzburg, Austria | 337 (12% smokers) Active: 148 Control: 189                                          | 62.2 (8.8) vs 63.6 (10.8)                                | 51.3              | <u>Retired:</u> 67.4%<br><u>Low education level:</u> 89.5%               | 7.02 (1.25) vs 7.08 (1.25)                             | 8.4 (7.1) vs 7.0 (5.6)                   | MDT (GP, nutritionist, psychologist, sports scientist), trained PL | <u>Patient education (24 months)</u> Weekly physical exercise meeting for at least 1-h. Monthly peer group meetings.<br><br><u>PL training:</u> Six 4-h sessions during 1 <sup>st</sup> year. | 8-12 patients each group | <u>Patient modules:</u> Personal, social, emotional topics in diabetes (diet, cardiovascular risk management, prevention of diabetes complications, self-management, medical checks, depression).<br><br><u>PL modules:</u> Physical activity, management of T2D, nutrition, motivation | 9 instruction sheets on exercise.<br><br>Standard curriculum for peer group meetings with newsletters before the sessions. | <u>Attendance rates of PL training:</u> Median 5<br><br><u>Median number of physical exercise meetings of each patient:</u> 23<br><br><u>Frequency of peer group meetings:</u> |

SUPPLEMENTARY DATA

| Study setting                             | Country                 | Study population                                                                                                               | Age*                     | Female gender (%) | Socio-economic & education status                                                                              | Base-line HbA <sub>1c</sub> <sup>a</sup> | DM duration <sup>a</sup> | Personnel involved (overall)     | Frequency & duration of patient/personnel training                                                                                                                                                                                                                                                                                                                                                                                                                    | Patients per group                | Curriculum                                                                                                                                                                                                                                                                                                                                                                                                                                                                                                                                                    | Quality assurance                                                                                                                                        | Attendance rates/intensity                                                                                                       |
|-------------------------------------------|-------------------------|--------------------------------------------------------------------------------------------------------------------------------|--------------------------|-------------------|----------------------------------------------------------------------------------------------------------------|------------------------------------------|--------------------------|----------------------------------|-----------------------------------------------------------------------------------------------------------------------------------------------------------------------------------------------------------------------------------------------------------------------------------------------------------------------------------------------------------------------------------------------------------------------------------------------------------------------|-----------------------------------|---------------------------------------------------------------------------------------------------------------------------------------------------------------------------------------------------------------------------------------------------------------------------------------------------------------------------------------------------------------------------------------------------------------------------------------------------------------------------------------------------------------------------------------------------------------|----------------------------------------------------------------------------------------------------------------------------------------------------------|----------------------------------------------------------------------------------------------------------------------------------|
|                                           |                         |                                                                                                                                |                          |                   |                                                                                                                |                                          |                          |                                  |                                                                                                                                                                                                                                                                                                                                                                                                                                                                       |                                   |                                                                                                                                                                                                                                                                                                                                                                                                                                                                                                                                                               |                                                                                                                                                          | 12 (67% of 15 possible sessions)                                                                                                 |
| <b>Chao 2015(11)</b>                      |                         |                                                                                                                                |                          |                   |                                                                                                                |                                          |                          |                                  |                                                                                                                                                                                                                                                                                                                                                                                                                                                                       |                                   |                                                                                                                                                                                                                                                                                                                                                                                                                                                                                                                                                               |                                                                                                                                                          |                                                                                                                                  |
| District hospital (endocrinology service) | Nanjing, China          | 100 (elderly; >60% had T2D complications)<br>Active: 50<br>Control: 50                                                         | 68.5 (6.0) vs 70.7 (6.8) | 51.0              | <High school education:<br>38.0%                                                                               | FPG:<br>7.9 (2.5) vs 7.5 (2.4)           | ≥5 years:<br>49.0%       | CHW, care managers, researchers  | Patient education (18 months):<br>at least monthly contact; distribution of health promotion materials                                                                                                                                                                                                                                                                                                                                                                | Individual, group                 | lifestyle, psychological aspects of health, diabetes foot disease, cardio-cerebrovascular complications, DN, self-management                                                                                                                                                                                                                                                                                                                                                                                                                                  | NA                                                                                                                                                       | NA                                                                                                                               |
| <b>Edelman 2015(12)</b>                   |                         |                                                                                                                                |                          |                   |                                                                                                                |                                          |                          |                                  |                                                                                                                                                                                                                                                                                                                                                                                                                                                                       |                                   |                                                                                                                                                                                                                                                                                                                                                                                                                                                                                                                                                               |                                                                                                                                                          |                                                                                                                                  |
| 9 primary care practices                  | US                      | 377 (HbA <sub>1c</sub> ≥7.5% with hypertension; 49.9% White)<br>Active: 193<br>Control: 184                                    | 58.7 (10.9)              | 54.6              | Low health literacy:<br>31.6%<br><br>Not employed or retired:<br>54.9%<br><br><High school education:<br>49.1% | 9.1 (1.0)                                | NA                       | Nurses                           | Patient education (24 months):<br>calls within 2 weeks of randomization, every 8 weeks thereafter; low health-literacy handouts, community resources targeting relevant behaviours<br><br>Nurses training:<br>several hours of didactic training in core case management strategies (e.g. motivational interviewing), DM management                                                                                                                                   | Individual                        | Healthful behaviors for diabetes & hypertension control:<br>medication adherence, weight loss, diet planning (low sodium/low GI diet, portion control), exercise, smoking/alcohol cessation<br><br>Fundamentals supporting attainment of healthful behaviours:<br>basic diabetes & hypertension knowledge, insulin self-management, hypoglycemia, stress management, engaging providers in shared decision-making<br><br>Patient-specific barriers to healthful behaviours:<br>low health literacy, poor memory, fear of side effects, lack of social support | Clinical experts listened in on study calls periodically & monitored for possible safety concerns. Monthly meetings with MDT to discuss patients' issues | Completion of scheduled calls:<br>78 vs 81%<br><br>Mean (SD) number of completed calls (scheduled 12):<br>9.3 (3.3) vs 9.7 (3.5) |
| <b>Tao 2015(13)</b>                       |                         |                                                                                                                                |                          |                   |                                                                                                                |                                          |                          |                                  |                                                                                                                                                                                                                                                                                                                                                                                                                                                                       |                                   |                                                                                                                                                                                                                                                                                                                                                                                                                                                                                                                                                               |                                                                                                                                                          |                                                                                                                                  |
| 69 general practices                      | Cambridge, Leicester UK | 1024 short term cost-effectiveness (Screen detectedT2D)<br>Active: 513<br>Control: 511<br><br>999 long term modelling analysis | 61.1 (7.2) vs 60.1 (7.5) | 38.9              | NA                                                                                                             | 7.3 (1.7)                                | Screen detected          | Physicians, DM specialist nurses | Cambridge:<br>one 30-min annual review for each patient, 3 additional 10-min consultations with a GP and 3 with a nurse, per year for the 1 <sup>st</sup> 3 years after diagnosis. Provision of educational materials<br><br>Leicester:<br>Structured DESMOND education within 1 <sup>st</sup> 2 months of study, or individual advice from dietician. Provision of 2-monthly peripatetic clinic within 1 <sup>st</sup> year from a DM specialist nurse or physician. | Individual, group (not specified) | Cambridge modules:<br>Basic of DM, 5-10% weight loss, exercise, alcohol, medications adherence, SMBG titration, smoking cessation<br><br>Leicester – DESMOND model:<br>Self-management, lifestyle changes (dietary habits, exercise, smoking cessation, SMBG), CV risk factors, medications                                                                                                                                                                                                                                                                   | NA                                                                                                                                                       | NA                                                                                                                               |
| <b>Ayala 2015(14)</b>                     |                         |                                                                                                                                |                          |                   |                                                                                                                |                                          |                          |                                  |                                                                                                                                                                                                                                                                                                                                                                                                                                                                       |                                   |                                                                                                                                                                                                                                                                                                                                                                                                                                                                                                                                                               |                                                                                                                                                          |                                                                                                                                  |

SUPPLEMENTARY DATA

| Study setting               | Country                     | Study population                                                                                                                   | Age*                            | Female gender (%) | Socio-economic & education status                             | Base-line HbA <sub>1c</sub> <sup>a</sup> | DM duration <sup>a</sup> | Personnel involved (overall)                                                | Frequency & duration of patient/personnel training                                                                                                                                                                                   | Patients per group                         | Curriculum                                                                                                                                                                                                                                                                                                                                                                                                                                          | Quality assurance                                                                       | Attendance rates/intensity                                                                                                                   |
|-----------------------------|-----------------------------|------------------------------------------------------------------------------------------------------------------------------------|---------------------------------|-------------------|---------------------------------------------------------------|------------------------------------------|--------------------------|-----------------------------------------------------------------------------|--------------------------------------------------------------------------------------------------------------------------------------------------------------------------------------------------------------------------------------|--------------------------------------------|-----------------------------------------------------------------------------------------------------------------------------------------------------------------------------------------------------------------------------------------------------------------------------------------------------------------------------------------------------------------------------------------------------------------------------------------------------|-----------------------------------------------------------------------------------------|----------------------------------------------------------------------------------------------------------------------------------------------|
| 3 primary care clinics      | California, US              | 336 (HbA <sub>1c</sub> ≥7.0%; 96.0% Latino or Hispanic) Active: 168 Control: 168                                                   | 56.3 (11.9)                     | 63.0              | Poverty: 62.0%<br>≤ 6 <sup>th</sup> grade of education: 41.0% | 8.7 (1.5)                                | NA                       | Trained PL (volunteers with previous DM education, not required to have DM) | Patient education (12 months): achieved 8 telephone or in person contacts in 1 <sup>st</sup> 6 months, additional contacts as needed in the last 6 months<br><br>PL training: Received 40-50 hours of training & 2 booster trainings | 34 peer leaders. Each peer to 5-8 patients | Patient modules: assistance with problem-solving e.g. barriers to medication use, social/emotional support & health care linkages (availability of specialty services)<br><br>PL modules: 10 manuals on lifestyle, emotional health, medical management, ways to conduct home/clinic visits, ways to lead cooking and physical activity support groups, adult learning theory (interaction, experiences sharing & opportunities to practice skills) | Weekly or biweekly meetings to review patient contact logs with peer leader coordinator | Median number of achieved contacts in 1 <sup>st</sup> 6 months: 4 (1-24)<br>- 137 (92%) had telephone contacts<br>- 53 (36%) had ≥6 contacts |
| <b>McDermott 2015(15)</b>   |                             |                                                                                                                                    |                                 |                   |                                                               |                                          |                          |                                                                             |                                                                                                                                                                                                                                      |                                            |                                                                                                                                                                                                                                                                                                                                                                                                                                                     |                                                                                         |                                                                                                                                              |
| 12 primary care clusters    | North Queensland, Australia | 213 (HbA <sub>1c</sub> >8.5% & at least 1 major comorbidity) -50% indigenous; 50% Torres Straits Islander Active: 100 Control: 113 | Mean 47.9 (95% CI 46.6 to 49.2) | 62.4              | Unemployed: 46.5%<br>≤12 years of education: 67.1%            | 10.7                                     | NA                       | CHW, nurses, primary care team                                              | CHW training: Intensive 3-week training & 2 workshops on refresher training (GCP & reflective practice)                                                                                                                              | Each CHW to 9-26 patients                  | a. Rationale for CCM & evidence-based management in DM, CHD, renal disease, hypertension, COPD<br>b. "Hands-on" case management: regular home visits, basic DM care (scheduled clinical checks, blood tests, counselling & referral as per guidelines supported by the clinical team)<br>c. Engaging with families and using local resources to support effective patient self-management.                                                          | CHW's diaries for intervention fidelity check                                           | NA                                                                                                                                           |
| <b>Segal 2016(16)</b>       |                             |                                                                                                                                    |                                 |                   |                                                               |                                          |                          |                                                                             |                                                                                                                                                                                                                                      |                                            |                                                                                                                                                                                                                                                                                                                                                                                                                                                     |                                                                                         |                                                                                                                                              |
| 12 primary care clusters    | North Queensland, Australia | 213 (HbA <sub>1c</sub> >8.5% & at least 1 major comorbidity) -50% indigenous; 50% Torres Straits Islander Active: 100 Control: 113 | Mean 47.9 (95% CI 46.6 to 49.2) | 62.4              | Unemployed: 46.5%<br>≤12 years of education: 67.1%            | 10.7                                     | NA                       | CHW, nurses, primary care team                                              | CHW training: Intensive 3-week training & 2 workshops on refresher training (GCP & reflective practice)                                                                                                                              | Each CHW to 9-26 patients                  | a. Rationale for CCM & evidence-based management in DM, CHD, renal disease, hypertension, COPD<br>b. "Hands-on" case management: regular home visits, basic DM care (scheduled clinical checks, blood tests, counselling & referral as per guidelines supported by the clinical team)<br>c. Engaging with families and using local resources to support effective patient self-management.                                                          | CHW's diaries for intervention fidelity check                                           | NA                                                                                                                                           |
| <b>Gold 2015(17)</b>        |                             |                                                                                                                                    |                                 |                   |                                                               |                                          |                          |                                                                             |                                                                                                                                                                                                                                      |                                            |                                                                                                                                                                                                                                                                                                                                                                                                                                                     |                                                                                         |                                                                                                                                              |
| 11 Community health centres | US                          | 3856 early clinics; 4516 late clinics. Total 8372 (T2D of whom statin & RASi were indicated)                                       | >90% aged 55-75 years           | 61.0              | NA                                                            | NA                                       | NA                       | Adopted Kaiser Permanente QI approach                                       | Patient education (24 months): electronic health records shortcuts; exam room poster & handouts in English, Spanish, Russian                                                                                                         | NA                                         | essential medications & its importance of adherence                                                                                                                                                                                                                                                                                                                                                                                                 | NA                                                                                      | NA                                                                                                                                           |

SUPPLEMENTARY DATA

| Study setting                   | Country                   | Study population                                                                             | Age*                            | Female gender (%) | Socio-economic & education status                                                   | Base-line HbA <sub>1c</sub> <sup>a</sup> | DM duration <sup>a</sup> | Personnel involved (overall)                                                 | Frequency & duration of patient/personnel training                                                                                                                                                                                    | Patients per group                              | Curriculum                                                                                                                                                                                                                                                                                                                                                                                                                                                                                | Quality assurance                                                                                                                                                          | Attendance rates/intensity                                                                                                                             |
|---------------------------------|---------------------------|----------------------------------------------------------------------------------------------|---------------------------------|-------------------|-------------------------------------------------------------------------------------|------------------------------------------|--------------------------|------------------------------------------------------------------------------|---------------------------------------------------------------------------------------------------------------------------------------------------------------------------------------------------------------------------------------|-------------------------------------------------|-------------------------------------------------------------------------------------------------------------------------------------------------------------------------------------------------------------------------------------------------------------------------------------------------------------------------------------------------------------------------------------------------------------------------------------------------------------------------------------------|----------------------------------------------------------------------------------------------------------------------------------------------------------------------------|--------------------------------------------------------------------------------------------------------------------------------------------------------|
| <b>Nicolucci 2015(18)</b>       |                           |                                                                                              |                                 |                   |                                                                                     |                                          |                          |                                                                              |                                                                                                                                                                                                                                       |                                                 |                                                                                                                                                                                                                                                                                                                                                                                                                                                                                           |                                                                                                                                                                            |                                                                                                                                                        |
| 29 GPs                          | 2 health districts, Italy | 302 (HbA <sub>1c</sub> 7.5-10.0% & BP >130/80 despite on treatment) Active: 153 Control: 149 | 59.1 (10.3) vs 57.8 (8.9)       | 38.4              | NA                                                                                  | 7.9 (0.7) vs 8.0 (0.8)                   | 8.3 (6.2) vs 8.7 (6.2)   | Nurses                                                                       | <u>Patient education (12 months):</u> Monthly phone contacts by nurses. Automated messages from computer database                                                                                                                     | NA                                              | SMBG, medications adherence, possible barriers to good health                                                                                                                                                                                                                                                                                                                                                                                                                             | NA                                                                                                                                                                         | NA                                                                                                                                                     |
| <b>Kim 2015(19)</b>             |                           |                                                                                              |                                 |                   |                                                                                     |                                          |                          |                                                                              |                                                                                                                                                                                                                                       |                                                 |                                                                                                                                                                                                                                                                                                                                                                                                                                                                                           |                                                                                                                                                                            |                                                                                                                                                        |
| Non-profit community agency     | US                        | 250 (HbA <sub>1c</sub> ≥7.0%; underserved Korean Americans) Active: 120 Control: 130         | 58.7 (8.4)                      | 43.1              | <u>No health insurance:</u> 49.8%<br><br><u>Mean years of education:</u> 13.4 (3.0) | 8.9 (0.2) vs 8.8 (0.2)                   | 8.5 (7.2)                | Bilingual RN & trained CHW                                                   | <u>Patient education (12 months):</u> GE: weekly 2-hour sessions for 6 weeks.<br><br>Motivational interview: monthly x 12. Total 11 counselling sessions (15-45 min in length)                                                        | 4 RN to 38 patients<br><br>3 CHW to 67 patients | a. behavioral education (problem solving, coping skills, cognitive reframing)<br>b. DM: treatment, risk factors, SMBG, ↑health literacy skills (reading food labels, healthcare resources access)                                                                                                                                                                                                                                                                                         | Weekly RN-CHW meeting to discuss on challenges & strategies to overcome barriers. The research team reviewed one of every ten counselling records on intervention fidelity | <u>Mean GE attendance rate:</u> 96.1% - 109 (90.8%) attended all 6 classes<br><br><u>Mean number of motivational interview sessions:</u> 7.8 out of 11 |
| <b>Pérez-Escamilla 2015(20)</b> |                           |                                                                                              |                                 |                   |                                                                                     |                                          |                          |                                                                              |                                                                                                                                                                                                                                       |                                                 |                                                                                                                                                                                                                                                                                                                                                                                                                                                                                           |                                                                                                                                                                            |                                                                                                                                                        |
| Primary care clinic             | US                        | 211 (highly impoverished Latinos with T2D & HbA <sub>1c</sub> ≥7%) Active: 105 Control: 106  | 56.3 (11.8)                     | 73.5              | <u>&lt;high school education:</u> 74.0%                                             | 9.58 (0.12)                              | NA                       | 2 trained bilingual CHW (nurse, MA)                                          | <u>Patient education (12 months):</u> 17 home visit sessions: weekly at month 1, biweekly at months 2 & 3, monthly thereafter till month 12<br><br><u>CHW training:</u> 65-h of core training & more than 25-h supplemental training. | Individual                                      | <u>Patient modules:</u> T2D & its complications, nutrition, physical activity, SMBG, adherence to medications & medical appointments, and mental health. Hands-on activities e.g. onsite supermarket shopping, food label reading<br><br><u>CHW modules:</u> T2D pathophysiology, risk factors, lifestyle, SMBG & medications, sick days, psychosocial & behavioral health. Also on motivational interviewing & communication skills, social determinants of health & cultural competence | Weekly troubleshoot meeting with research team based on home visit progress notes                                                                                          | 51% received all 17 visits<br><br><u>Mean duration of each home visit (min):</u> 87.8 (18.2)                                                           |
| <b>Simmons 2015(21)</b>         |                           |                                                                                              |                                 |                   |                                                                                     |                                          |                          |                                                                              |                                                                                                                                                                                                                                       |                                                 |                                                                                                                                                                                                                                                                                                                                                                                                                                                                                           |                                                                                                                                                                            |                                                                                                                                                        |
| 130 rural clusters              | Essex, England            | 1299 (7.1% ethnic minority) Combined: 322 Group: 330                                         | Combined 65.3 (9.3), Group 65.2 | 39.6              | <u>Professional:</u> >60%<br><br><u>Completed tertiary education:</u>               | 7.4                                      | Median (IQR) : Combined  | Trained volunteer PL with DM; MDT (PN, DM specialist nurse, dietitians, PCP) | <u>Patient education (12 months):</u> telephone/e-mail for 1:1 counselling, or monthly GE x 5                                                                                                                                         | Each PL to maximum 10 patients                  | <u>Patient modules:</u> portion control, truths & myths about DM, goal-setting, medications, foot care, exercise, self-efficacy promotion, social/emotional support                                                                                                                                                                                                                                                                                                                       | <u>Peer-DM specialist nurses troubleshoot meetings on recorded patients' phone</u>                                                                                         | 61.4% (592/977) of intervention patients attended an actual peer support session                                                                       |

SUPPLEMENTARY DATA

| Study setting                                           | Country                | Study population                                                                                                                              | Age*                                               | Female gender (%) | Socio-economic & education status                                                                       | Base-line HbA <sub>1c</sub> <sup>a</sup> | DM duration <sup>a</sup>                                          | Personnel involved (overall)  | Frequency & duration of patient/personnel training                                                                                                                                                                                | Patients per group                | Curriculum                                                                                                                                                                                                                                                                                   | Quality assurance                                                          | Attendance rates/intensity                                                                               |
|---------------------------------------------------------|------------------------|-----------------------------------------------------------------------------------------------------------------------------------------------|----------------------------------------------------|-------------------|---------------------------------------------------------------------------------------------------------|------------------------------------------|-------------------------------------------------------------------|-------------------------------|-----------------------------------------------------------------------------------------------------------------------------------------------------------------------------------------------------------------------------------|-----------------------------------|----------------------------------------------------------------------------------------------------------------------------------------------------------------------------------------------------------------------------------------------------------------------------------------------|----------------------------------------------------------------------------|----------------------------------------------------------------------------------------------------------|
|                                                         |                        | Individual: 325<br>Control: 322                                                                                                               | (10.2), Individual 65.2 (8.9), Control 64.6 (10.3) |                   | 25.0%                                                                                                   |                                          | 6 (3-11), Group 7 (3-12), Individual 7 (3-12), Control 6.5 (3-12) |                               | <u>PL training:</u><br>Two 3-h evening training sessions (1:1 meetings up to 1 hour; group meetings up to 1.5 hours). Summative assessment with provision of training certificates.                                               |                                   | <u>PL modules:</u><br>a. basis of peer support & behaviour interventions<br>b. basic DM knowledge (food, physical activity, self-monitoring)<br>c. group/individual support skills (motivational interview)<br>d. safety, communication & emotion handling skills, patient's confidentiality | <u>or face-to-face meetings:</u><br>monthly x 6, every 2 months thereafter | <u>Mean number of attendance:</u><br>3.7 (others in telephone/ email contact)                            |
| <b>van Dijk-de Vries 2015(22)</b>                       |                        |                                                                                                                                               |                                                    |                   |                                                                                                         |                                          |                                                                   |                               |                                                                                                                                                                                                                                   |                                   |                                                                                                                                                                                                                                                                                              |                                                                            |                                                                                                          |
| 40 family practices                                     | South Netherlands      | 264 (low socio-economic T2D with emotional distress or problems with daily functioning; 99.2% Western descent)<br>Active: 117<br>Control: 147 | 64 (10) vs 65 (9)                                  | 46.2              | <u>Low education status:</u><br>69.3%<br><br><u>Absence of psychological care:</u><br>83.0%             | 7.0 vs 6.9                               | 9 (8) vs 8 (6)                                                    | PN                            | <u>Patient education (12 months):</u><br>extra 20-min consultations<br><br><u>PN training:</u><br>three 8-h training sessions, followed by booster sessions & telephone consultations, whose frequency depends on the PNs' needs. | NA                                | <u>Patient modules:</u><br>Problem solving, cognitive therapy, self-management support<br><br><u>PN modules:</u><br>Problems identification (metabolic & psychosocial), goal-setting                                                                                                         | Intervention fidelity was checked by audiotaped consultation               | 46 (39.3%) patients with DM distress or problems with daily functioning were registered for intervention |
| <b>Chung 2014(23)</b>                                   |                        |                                                                                                                                               |                                                    |                   |                                                                                                         |                                          |                                                                   |                               |                                                                                                                                                                                                                                   |                                   |                                                                                                                                                                                                                                                                                              |                                                                            |                                                                                                          |
| DM clinic at a university hospital                      | Kuala Lumpur, Malaysia | 241 (HbA <sub>1c</sub> ≥8.0%; 44.8% Malays, 20.3% Chinese, 32.8% Indians)<br>Active: 120<br>Control: 121                                      | 59.7 (9.5) vs 58.5 (8.3)                           | 56.0              | <u>Unemployed:</u><br>59.3%<br><br><u>&lt;Secondary school education:</u><br>65.1%                      | 9.6 (1.3) vs 9.5 (1.4)                   | 16.3 (8.0) for both                                               | Pharmacist                    | <u>Patient education (12 months):</u><br>Monthly follow-up phone calls with Every 3-4 months' review post clinic consultation                                                                                                     | NA                                | Review on medications & any drug-related problem. Education on DM, hypertension, dyslipidemia, SMBG & medication adherence                                                                                                                                                                   | NA                                                                         | NA                                                                                                       |
| <b>Hsu 2014(24)</b>                                     |                        |                                                                                                                                               |                                                    |                   |                                                                                                         |                                          |                                                                   |                               |                                                                                                                                                                                                                                   |                                   |                                                                                                                                                                                                                                                                                              |                                                                            |                                                                                                          |
| 27 community clinics                                    | Taiwan                 | 1060<br>Active: 789<br>Control: 271                                                                                                           | NA                                                 | NA                | NA                                                                                                      | Mean 8.4 vs 8.6 (no SD)                  | NA                                                                | Case managers (not specified) | <u>Patient education (3.5 years follow up):</u><br>Group education & individualized nutrition counselling every 3 months (30-60 min each)                                                                                         | NA                                | Diet (low fat, carbohydrate counting), exercise, SMBG, foot care, medications, complication management                                                                                                                                                                                       | NA                                                                         | NA                                                                                                       |
| <b>Adepoju 2014(25)</b>                                 |                        |                                                                                                                                               |                                                    |                   |                                                                                                         |                                          |                                                                   |                               |                                                                                                                                                                                                                                   |                                   |                                                                                                                                                                                                                                                                                              |                                                                            |                                                                                                          |
| 7 clinics of a university affiliated health care system | Texas, US              | 376 (HbA <sub>1c</sub> ≥7.5%; 36.4% Hispanics/ non-Hispanic Blacks with T2D)                                                                  | 57.56 (10.92)                                      | 55.0              | <u>Annual household Income &lt;US\$ 50,000:</u> 63.7%<br><br><u>&lt;high school education:</u><br>28.2% | 9.28 (1.56)                              | 3.11 (2.43)                                                       | Trained PL                    | <u>Patient education (24 months):</u><br><u>CDSMP:</u> weekly 2.5-h classroom based teaching for 6 weeks in clinical environments & community settings<br><br><u>PDA:</u> using DM pilot software                                 | Individual, group (not specified) | <u>CDSMP:</u> DM self-management (decision making, action planning, effective communication skills)<br><br><u>PDA:</u> Glucose & BP monitoring, medication usage, physical activity, dietary intake                                                                                          | Not monitored, use pre-scripted materials                                  | NA                                                                                                       |

SUPPLEMENTARY DATA

| Study setting                                           | Country     | Study population                                                                                                                               | Age*                       | Female gender (%) | Socio-economic & education status                                                                    | Base-line HbA <sub>1c</sub> <sup>a</sup> | DM duration <sup>a</sup> | Personnel involved (overall)                                                       | Frequency & duration of patient/personnel training                                                                                                                                                                                                                                                                                                                                                                          | Patients per group              | Curriculum                                                                                                                                                                                                                                                                                                                                                                                                                                    | Quality assurance                                                                                                                                                   | Attendance rates/intensity                                    |
|---------------------------------------------------------|-------------|------------------------------------------------------------------------------------------------------------------------------------------------|----------------------------|-------------------|------------------------------------------------------------------------------------------------------|------------------------------------------|--------------------------|------------------------------------------------------------------------------------|-----------------------------------------------------------------------------------------------------------------------------------------------------------------------------------------------------------------------------------------------------------------------------------------------------------------------------------------------------------------------------------------------------------------------------|---------------------------------|-----------------------------------------------------------------------------------------------------------------------------------------------------------------------------------------------------------------------------------------------------------------------------------------------------------------------------------------------------------------------------------------------------------------------------------------------|---------------------------------------------------------------------------------------------------------------------------------------------------------------------|---------------------------------------------------------------|
|                                                         |             | CDSMP: 101<br>PDA: 81<br>Combined: 99<br>Control: 95                                                                                           |                            |                   |                                                                                                      |                                          |                          |                                                                                    | <u>PL training:</u><br>4-day prior training                                                                                                                                                                                                                                                                                                                                                                                 |                                 | <u>PL modules:</u><br>Not specified                                                                                                                                                                                                                                                                                                                                                                                                           |                                                                                                                                                                     |                                                               |
| <b>Frei 2014(26)</b>                                    |             |                                                                                                                                                |                            |                   |                                                                                                      |                                          |                          |                                                                                    |                                                                                                                                                                                                                                                                                                                                                                                                                             |                                 |                                                                                                                                                                                                                                                                                                                                                                                                                                               |                                                                                                                                                                     |                                                               |
| 30 primary care practices                               | Switzerland | 326 (HbA <sub>1c</sub> ≥7.0%)<br>Active: 162<br>Control: 164                                                                                   | 65.7 (10.4) vs 68.3 (10.6) | 42.6              | <u>Mean years of education:</u><br>11.6                                                              | 7.8 vs 7.6                               | 9.5 (7.4) vs 10.3 (7.8)  | PCPs, PN                                                                           | <u>Patient education (12 months):</u><br>Every 4-monthly PN consultations<br><br><u>Personnel education:</u><br>PN: 6-day educational course organized by union of Swiss Practice Nurses & two 4-h interactive workshops<br><br>GP: two 4-h interactive workshops (right after randomization & 6 months later)                                                                                                              | NA                              | <u>Patient modules:</u><br>SMBG, insulin administration, DM & its complications, behavioral goals (dietary & medications adherence, moderate exercise 30-min 3 days per week)<br><br><u>Personnel modules:</u><br>PN: basic DM knowledge, drug adherence, ways to perform consultations with monitoring tools, communication skills<br><br><u>Workshops:</u> team approach, evidence-based DM therapy, cardiovascular risk factors management | NA                                                                                                                                                                  | NA                                                            |
| <b>Forjuoh 2014(27)</b>                                 |             |                                                                                                                                                |                            |                   |                                                                                                      |                                          |                          |                                                                                    |                                                                                                                                                                                                                                                                                                                                                                                                                             |                                 |                                                                                                                                                                                                                                                                                                                                                                                                                                               |                                                                                                                                                                     |                                                               |
| 7 clinics of a university affiliated health care system | Texas, US   | 376 (HbA <sub>1c</sub> ≥7.5%; 36.4% Hispanics/non-Hispanic Blacks with T2D)<br>CDSMP: 101<br>PDA: 81<br>Combined: 99<br>Control: 95            | 57.56 (10.92)              | 55.0              | <u>Annual household income &lt;US\$ 50,000:</u> 63.7%<br><br><u>&lt;high school education:</u> 28.2% | 9.28 (1.56)                              | 3.11 (2.43)              | Trained PL                                                                         | <u>Patient education (24 months):</u><br>CDSMP: weekly 2.5 h classroom based teaching for 6 weeks in clinical environments & community settings<br><br><u>PL training:</u><br>4-day prior training                                                                                                                                                                                                                          | NA                              | <u>Patient modules:</u><br>CDSMP: DM self-management (decision making, action planning, effective communication skills)<br><br>PDA: Glucose & BP monitoring, medication usage, physical activity, and dietary intake by using DM pilot software.<br><br><u>PL modules:</u><br>Not specified                                                                                                                                                   | Not monitored                                                                                                                                                       | NA                                                            |
| <b>Chan 2014(28)</b>                                    |             |                                                                                                                                                |                            |                   |                                                                                                      |                                          |                          |                                                                                    |                                                                                                                                                                                                                                                                                                                                                                                                                             |                                 |                                                                                                                                                                                                                                                                                                                                                                                                                                               |                                                                                                                                                                     |                                                               |
| 3 publicly funded hospital-based DM centres             | Hong Kong   | 628 (Chinese T2D; 95.3% in high or very high 3.risk categories; 17.4% had cardiovascular & renal complications)<br>Active: 312<br>Control: 316 | 54.7 (9.3)                 | 43.5              | <u>Full/part time employment:</u> 48.3%<br><br><u>&lt;11 years of education:</u> 85.5%               | 8.2 (1.6)                                | 9.4 (7.7)                | Trio team (diabetologists, nurses, health care assistants) & 33 trained PL with DM | <u>Patient education (12 months):</u><br>JADE: 2-h group empowerment class 4-6 weeks after comprehensive assessments.<br><br><u>PL training (PEARL):</u><br>Four 8-h workshops with before & after evaluation. Nurses facilitated initial group sharing, followed by at least 12 telephone contacts, 15-min per call by peer leaders (biweekly for 3 months → monthly for 3 months → 1 call every other month for 6 months) | Each peer leader to 10 patients | <u>Patient modules:</u><br>Provision of personalized report to reinforce on self-care, targets attainment<br><br><u>PL modules:</u><br>SMBG, medications adherence, lifestyle, communication skills, experience sharing                                                                                                                                                                                                                       | Mailed reports on peer-patient discussion every 3 months.<br><br>Three half-day troubleshoot meetings among physicians, nurses, project coordinators & peer leaders | <u>Median (IQR) number of calls per patient:</u><br>20 (9-24) |
| <b>Steventon 2014(29)</b>                               |             |                                                                                                                                                |                            |                   |                                                                                                      |                                          |                          |                                                                                    |                                                                                                                                                                                                                                                                                                                                                                                                                             |                                 |                                                                                                                                                                                                                                                                                                                                                                                                                                               |                                                                                                                                                                     |                                                               |
| 112                                                     | Cornwall,   | 513                                                                                                                                            | 63.9                       | 42.1              | NA                                                                                                   | 8.5 (1.8)                                | NA                       | Specialist nurse                                                                   | <u>Patient education (12 months):</u>                                                                                                                                                                                                                                                                                                                                                                                       | Individual                      | DM management, limited                                                                                                                                                                                                                                                                                                                                                                                                                        | NA                                                                                                                                                                  | NA                                                            |

SUPPLEMENTARY DATA

| Study setting                       | Country                   | Study population                                                                       | Age*                  | Female gender (%) | Socio-economic & education status                                                                   | Base-line HbA <sub>1c</sub> <sup>a</sup> | DM duration <sup>a</sup> | Personnel involved (overall)                                             | Frequency & duration of patient/personnel training                                                                                                                                                                                                                                                                                                                                                                                                                                                                                                                                                                                                                                                                                                                        | Patients per group | Curriculum                                                                                                                                                                                                                                                                                                                                         | Quality assurance                                                                                                               | Attendance rates/intensity                                                                                                                                                        |
|-------------------------------------|---------------------------|----------------------------------------------------------------------------------------|-----------------------|-------------------|-----------------------------------------------------------------------------------------------------|------------------------------------------|--------------------------|--------------------------------------------------------------------------|---------------------------------------------------------------------------------------------------------------------------------------------------------------------------------------------------------------------------------------------------------------------------------------------------------------------------------------------------------------------------------------------------------------------------------------------------------------------------------------------------------------------------------------------------------------------------------------------------------------------------------------------------------------------------------------------------------------------------------------------------------------------------|--------------------|----------------------------------------------------------------------------------------------------------------------------------------------------------------------------------------------------------------------------------------------------------------------------------------------------------------------------------------------------|---------------------------------------------------------------------------------------------------------------------------------|-----------------------------------------------------------------------------------------------------------------------------------------------------------------------------------|
| general practices                   | Kent & Newham, UK         | (65.7% had HbA <sub>1c</sub> >7.5%; 53.2% White)<br>Active: 300<br>Control: 213        | (13.0) vs 66.2 (11.9) |                   |                                                                                                     | vs 8.3 (1.7)                             |                          | or community matrons, care coordinator                                   | Educational messages generated from the telehealth system were based on the SMBG frequency                                                                                                                                                                                                                                                                                                                                                                                                                                                                                                                                                                                                                                                                                |                    | medications titration (matrons)                                                                                                                                                                                                                                                                                                                    |                                                                                                                                 |                                                                                                                                                                                   |
| <b>Wilson 2014(30)</b>              |                           |                                                                                        |                       |                   |                                                                                                     |                                          |                          |                                                                          |                                                                                                                                                                                                                                                                                                                                                                                                                                                                                                                                                                                                                                                                                                                                                                           |                    |                                                                                                                                                                                                                                                                                                                                                    |                                                                                                                                 |                                                                                                                                                                                   |
| 49 general practices                | 3 primary care trusts, UK | 1,997 (>50% with HbA <sub>1c</sub> <7.0%; 58.5% White)<br>Active: 1057<br>Control: 940 | NA                    | 42.1              | NA                                                                                                  | 7.34 (1.40) vs 7.26 (1.24)               | NA                       | DM specialist nurses, GPwSI, community based diabetologist               | <u>Patient education (18 months):</u><br>Intermediate Care Clinics for DM                                                                                                                                                                                                                                                                                                                                                                                                                                                                                                                                                                                                                                                                                                 | NA                 | DM self-management                                                                                                                                                                                                                                                                                                                                 | NA                                                                                                                              | NA                                                                                                                                                                                |
| <b>Tang 2014(31)</b>                |                           |                                                                                        |                       |                   |                                                                                                     |                                          |                          |                                                                          |                                                                                                                                                                                                                                                                                                                                                                                                                                                                                                                                                                                                                                                                                                                                                                           |                    |                                                                                                                                                                                                                                                                                                                                                    |                                                                                                                                 |                                                                                                                                                                                   |
| A federally qualified health centre | Detroit, US               | 116 (Latinos T2D)<br>PL: 60<br>CHW: 56                                                 | 49.3 (11.0)           | 58.6              | <u>Annual household income &lt;US\$ 20,000:</u><br>94.4%<br><br><u>≤ Some high school:</u><br>77.4% | 8.0 (2.0)                                | 6.6 (5.9)                | Trained volunteer PL with DM or CHW (salaried employee of health clinic) | <u>Patient education - DSMS (18 months):</u><br><u>PL-led:</u> 6 months' program consisted of eleven 2-h culturally tailored interactive group self-management classes, two home visits (60 min in length) per month, one visit with the PL/CHW & GP → 12 months of weekly group sessions. Phone contacts to patients who missed DSMS over 3 consecutive weeks.<br><br><u>CHW-led:</u> similar 6 months' program → 12 months of monthly telephone outreach<br><br><u>Personnel training:</u><br><u>PL:</u> 46-h training for 12 weeks; had to meet the pre-established competency criteria for four domains: DM knowledge, active listening, empowerment-based facilitation & self-efficacy<br><br><u>CHW:</u> 160-h of community outreach training, 80-h of DM education | NA                 | <u>PL/CHW DSMS modules:</u><br>Patient empowerment, goal-setting, action plan, group-based problem solving, emotional & social support<br><br><u>PL/CHW training modules:</u><br>Basics of DM, communication, facilitation & behaviour modification skills, practice applying skills in experiential learning scenarios, motivational interviewing | NA                                                                                                                              | <u>At least one contact with PL/CHW between 6-18 months:</u><br>PL 27 (45.0%), CHW 30 (53.6%)<br><br><u>Mean number of contacts throughout study period:</u><br>PL 3.67, CHW 2.88 |
| <b>Rothschild 2014(32)</b>          |                           |                                                                                        |                       |                   |                                                                                                     |                                          |                          |                                                                          |                                                                                                                                                                                                                                                                                                                                                                                                                                                                                                                                                                                                                                                                                                                                                                           |                    |                                                                                                                                                                                                                                                                                                                                                    |                                                                                                                                 |                                                                                                                                                                                   |
| Primary care practices              | Chicago, US               | 144 (70.5% had HbA <sub>1c</sub> ≥7%; Mexican Americans)<br>Active: 73<br>Control: 71  | 53.7 (12.2)           | 67.4              | <u>≤6 years of education:</u><br>56.9%                                                              | 8.3 (2.0)                                | NA                       | Trained CHW (non-DM)                                                     | <u>Patient education (24 months):</u><br>36 home visits in total.<br><br><u>CHW training:</u><br>100-h of training with on-going supervision by 2 physicians, a nurse, and a clinical psychologist. Bimonthly                                                                                                                                                                                                                                                                                                                                                                                                                                                                                                                                                             | 3 CHWs             | <u>Patient modules:</u><br>Self-management skills (self-monitoring, environmental restructuring, social support, problem solving/decision making & stress management)<br><br><u>CHW modules (developed by Midwest Latino Health Research Centre):</u><br>Basics of DM, behavioral self-                                                            | Study psychologist reviewed audiotaped study visits & randomly assessed CHW intervention skills at 6- and 12-month home visits. | <u>Median number of visits/week:</u> 7<br><br><u>Mean duration of visits (min):</u> 99                                                                                            |

SUPPLEMENTARY DATA

| Study setting               | Country                | Study population                                                                              | Age*                                      | Female gender (%) | Socio-economic & education status                                               | Base-line HbA <sub>1c</sub> <sup>a</sup>  | DM duration <sup>a</sup>                              | Personnel involved (overall)                                | Frequency & duration of patient/personnel training                                                                                                                                                                                                                                                                                                                   | Patients per group                          | Curriculum                                                                                                                                                                                                                                                             | Quality assurance                                                                              | Attendance rates/intensity                                                                                                |
|-----------------------------|------------------------|-----------------------------------------------------------------------------------------------|-------------------------------------------|-------------------|---------------------------------------------------------------------------------|-------------------------------------------|-------------------------------------------------------|-------------------------------------------------------------|----------------------------------------------------------------------------------------------------------------------------------------------------------------------------------------------------------------------------------------------------------------------------------------------------------------------------------------------------------------------|---------------------------------------------|------------------------------------------------------------------------------------------------------------------------------------------------------------------------------------------------------------------------------------------------------------------------|------------------------------------------------------------------------------------------------|---------------------------------------------------------------------------------------------------------------------------|
|                             |                        |                                                                                               |                                           |                   |                                                                                 |                                           |                                                       |                                                             | individual & group sessions with psychologist for case discussion & feedback. Evaluated via post-tests for adequate knowledge & competency assessment by role-play                                                                                                                                                                                                   |                                             | management support, home visits                                                                                                                                                                                                                                        | Fortnightly troubleshoot meeting with research team                                            |                                                                                                                           |
| <b>Holmen 2014(33)</b>      |                        |                                                                                               |                                           |                   |                                                                                 |                                           |                                                       |                                                             |                                                                                                                                                                                                                                                                                                                                                                      |                                             |                                                                                                                                                                                                                                                                        |                                                                                                |                                                                                                                           |
| Primary care practices      | Norway                 | 151 (HbA <sub>1c</sub> ≥7.1%; >60% with 1-2 comorbidities) FTA-HC: 50 FTA: 51 Control: 50     | 57.0 (12.0)                               | 41.0              | Unemployed: 27.7%<br><br>≤12 years of education: 66.0%                          | 8.2 (1.1)                                 | FTA-HC: 9.6 (8.4), FTA: 11.2 (7.3), Control 9.4 (5.5) | DM specialist nurse with or without dietician               | Patient education (12 months): Via e-health or phone-based counselling at randomization & monthly for 4 months (20-min in length)                                                                                                                                                                                                                                    | NA                                          | DM self-management through awareness, SMBG, lifestyle, goal-setting, motivational feedback through symbols, visual graphs & trends reports                                                                                                                             | NA                                                                                             | 20 (39%) had ≥50 e-health interactions.<br><br>42 (84%) patients attended ≥4 health counselling sessions                  |
| <b>Eakin 2014(34)</b>       |                        |                                                                                               |                                           |                   |                                                                                 |                                           |                                                       |                                                             |                                                                                                                                                                                                                                                                                                                                                                      |                                             |                                                                                                                                                                                                                                                                        |                                                                                                |                                                                                                                           |
| 9 primary care practices    | Queensland, Australia  | 302 (79.5% had CVD; 87.4% Caucasians) Active: 151 Control: 151                                | 58.0 (8.6)                                | 43.7              | Full/part-time or casual employment: 62.9%<br><br><high school education: 11.6% | Median (IQR): 7.1 (6.4 to 8.0)            | Median (IQR): 5.0 (2.0 to 10.0)                       | Phone counsellor                                            | Patient education (18 months): Received a detailed workbook & up to 27 phone calls over 18 months (4 initial weekly calls; fortnightly calls for 5 months; monthly calls for 12 months)<br><br>Phone counsellor training: At least bachelor's level in nutrition ± exercise physiology. One month intensive training in study protocol & health behavior counselling | NA                                          | Patient modules: Behavioral therapy, motivational interview on self-monitoring, goal-setting, benefits of lifestyle changes to achieve 5-10% weight loss<br><br>Phone counsellor modules: Self-efficacy, social support, barriers & approach to health behavior change | Call content checklist, randomly taped phone calls & fortnightly clinical supervision meetings | Completion of ≥75% of intervention calls: 36.4% (55 of 151)<br><br>Mean duration of intervention calls (min): 24.6 (10.6) |
| <b>Dickinson 2014(35)</b>   |                        |                                                                                               |                                           |                   |                                                                                 |                                           |                                                       |                                                             |                                                                                                                                                                                                                                                                                                                                                                      |                                             |                                                                                                                                                                                                                                                                        |                                                                                                |                                                                                                                           |
| 40 primary care practices   | Colorado, US           | 822 (16.2% with psychiatric illness) Continuous QI: 189 Reflective adaptive: 312 Control: 321 | 60.5 (12.6) vs 61.9 (12.1) vs 60.0 (13.2) | 51.3              | NA                                                                              | 7.18 (1.59) vs 7.35 (1.76) vs 7.69 (2.00) | NA                                                    | MDT, practice facilitator                                   | Mainly practice & HCP levels of intervention                                                                                                                                                                                                                                                                                                                         | NA                                          | NA                                                                                                                                                                                                                                                                     | NA                                                                                             | NA                                                                                                                        |
| <b>Slingerland 2013(36)</b> |                        |                                                                                               |                                           |                   |                                                                                 |                                           |                                                       |                                                             |                                                                                                                                                                                                                                                                                                                                                                      |                                             |                                                                                                                                                                                                                                                                        |                                                                                                |                                                                                                                           |
| 13 hospitals                | The Netherlands        | 506 (84% on insulin ± oral antidiabetic agents) Active: 237 Control: 269                      | 65.0 (11.0)                               | 55.0              | NA                                                                              | 8.1 (1.3)                                 | Median (IQR): 11 (6 to 17)                            | Internal medicine doctors, DM specialist nurses, dietitians | Patient education (12 months): Provision of DM passport, educational meetings, waiting room leaflets & posters                                                                                                                                                                                                                                                       | NA                                          | NA                                                                                                                                                                                                                                                                     | NA                                                                                             | NA                                                                                                                        |
| <b>DePue 2013(37)</b>       |                        |                                                                                               |                                           |                   |                                                                                 |                                           |                                                       |                                                             |                                                                                                                                                                                                                                                                                                                                                                      |                                             |                                                                                                                                                                                                                                                                        |                                                                                                |                                                                                                                           |
| Primary care practices      | American Samoan Island | 104 (Intervention sample only; Tribal & under-served;                                         | 56.0 (12.5)                               | 57.0              | Unemployed: 57.0%<br><br><high school graduates;                                | 9.6 (2.1)                                 | NA                                                    | 1 NCM (RN), 4 trained CHWs                                  | Patient education (12 months): Bilingual culturally-tailored flipcharts. Intervention dose & content were based on patients' risk categories & self-selected goals. Received NDEP                                                                                                                                                                                    | Individual, group (high risk patients only) | 8 patient modules: Basics of DM, healthy eating, exercise, medications adherence, glucose/BP monitoring & progress tracking, risk reduction                                                                                                                            | Content checklist, observed by other CHWs, NCM reviewed                                        | Mean number of completed visits: 74%<br><br>Median number of                                                              |



SUPPLEMENTARY DATA

| Study setting               | Country                | Study population                                                      | Age*                      | Female gender (%) | Socio-economic & education status                                          | Base-line HbA <sub>1c</sub> <sup>a</sup> | DM duration <sup>a</sup> | Personnel involved (overall)        | Frequency & duration of patient/personnel training                                                                                                                                                                                                                                                                                                                                                                                                                                                                          | Patients per group                          | Curriculum                                                                                                                                                                                                                                                                                                                                                                                                                                                                                                                                          | Quality assurance                                                                                                         | Attendance rates/intensity                                                                                                                                                                                                     |
|-----------------------------|------------------------|-----------------------------------------------------------------------|---------------------------|-------------------|----------------------------------------------------------------------------|------------------------------------------|--------------------------|-------------------------------------|-----------------------------------------------------------------------------------------------------------------------------------------------------------------------------------------------------------------------------------------------------------------------------------------------------------------------------------------------------------------------------------------------------------------------------------------------------------------------------------------------------------------------------|---------------------------------------------|-----------------------------------------------------------------------------------------------------------------------------------------------------------------------------------------------------------------------------------------------------------------------------------------------------------------------------------------------------------------------------------------------------------------------------------------------------------------------------------------------------------------------------------------------------|---------------------------------------------------------------------------------------------------------------------------|--------------------------------------------------------------------------------------------------------------------------------------------------------------------------------------------------------------------------------|
|                             |                        | 18% on insulin)<br>High risk: 31<br>Moderate risk: 57<br>Low risk: 16 |                           |                   | 16.0%                                                                      |                                          |                          |                                     | education materials.<br><br><u>CHW training:</u><br>Minimum high school education. Certified on DM knowledge & anthropometric procedures                                                                                                                                                                                                                                                                                                                                                                                    |                                             | (smoking, alcohol, foot care, complications screening), healthy coping (stress and depression), problem solving<br><br><u>CHW modules:</u><br>Role-play, self-management support, motivational interview                                                                                                                                                                                                                                                                                                                                            | CHW's visit progress notes                                                                                                | <u>visits:</u><br>Low risk 5.5, moderate risk 11, high risk 28<br><br><u>Median length of visits:</u><br>Low risk 36.7, moderate risk 34.0, high risk 31.6                                                                     |
| <b>DePue 2013(38)</b>       |                        |                                                                       |                           |                   |                                                                            |                                          |                          |                                     |                                                                                                                                                                                                                                                                                                                                                                                                                                                                                                                             |                                             |                                                                                                                                                                                                                                                                                                                                                                                                                                                                                                                                                     |                                                                                                                           |                                                                                                                                                                                                                                |
| A community health centre   | American Samoan Island | 268 (underserved T2D)<br>Active: 104<br>Control: 164                  | 55.0 (12.7)               | 62.0              | <u>Unemployed:</u> 59.0%<br><br><u>Mean years of education:</u> 12.5 (2.2) | 9.8 (2.2)                                | NA                       | 1 NCM (RN), 4 trained CHWs          | <u>Patient education (12 months):</u><br>Bilingual culturally-tailored flipcharts. Intervention dose & content were based on patients' risk categories & self-selected goals. Received NDEP education materials.<br><br><u>CHW training:</u><br>Minimum high school education. Certified on DM knowledge & anthropometric procedures                                                                                                                                                                                        | Individual, group (high risk patients only) | <u>8 patient modules:</u><br>Basic of DM, healthy eating, exercise, medications adherence, glucose/BP monitoring & progress tracking, risk reduction (smoking, alcohol, foot care, complications screening), healthy coping (stress and depression), problem solving<br><br><u>CHW modules:</u><br>Role-play, self-management support, motivational interview                                                                                                                                                                                       | Content checklist, observed by other CHWs, NCM reviewed CHW's visit progress notes                                        | <u>Mean number of completed visits:</u> 74%<br><br><u>Median number of visits:</u><br>Low risk 5.5, moderate risk 11, high risk 28<br><br><u>Median length of visits:</u><br>Low risk 36.7, moderate risk 34.0, high risk 31.6 |
| <b>Gagliardino 2013(39)</b> |                        |                                                                       |                           |                   |                                                                            |                                          |                          |                                     |                                                                                                                                                                                                                                                                                                                                                                                                                                                                                                                             |                                             |                                                                                                                                                                                                                                                                                                                                                                                                                                                                                                                                                     |                                                                                                                           |                                                                                                                                                                                                                                |
| Primary care practices      | Argentina              | 198 (T2D with ≥2 years of DM follow-up)<br>Active: 93<br>Control: 105 | 62.0 (9.0) vs 60.0 (10.0) | 51.5              | NA                                                                         | 7.1 (1.5) vs 7.3 (1.5)                   | 6.0 (7.0) vs 6.0 (6.0)   | Trained PL                          | <u>Patient education:</u><br>4 weekly teaching (90–120 min each) & a reinforcement session at 6 months. Provided educational materials, multiple-choice-questions tests. Scheduled face-to-face or phone contacts with PL (weekly for the 1 <sup>st</sup> 6 months, biweekly for the next 3 months, monthly for the remaining 3 months)<br><br><u>PL training:</u><br>3-day intensive, structured, small-group interactive course. Monthly group calls among peers to share experience, challenges, and possible solutions. | Maximum 10 patients in each group           | <u>4 patient modules (PEDNID LA):</u><br>a. general T2D concepts, symptoms of hypoglycaemia & hyperglycaemia, SMBG with active patient participation in disease management<br>b. obesity & insulin sensitivity, weight loss, food selection (Plate model)<br>c. importance of foot care & regular exercise<br>d. 'sick days' rules, examinations & laboratory tests necessary to have good DM care<br><br><u>PL modules:</u><br>pedagogic, motivational/communication/group management techniques, basic DM control/treatment & evaluation concepts | Quarterly reports to patients' physicians. Phone contacts were recorded. Monthly troubleshoot meeting with research team. | NA                                                                                                                                                                                                                             |
| <b>Gagliardino 2013(40)</b> |                        |                                                                       |                           |                   |                                                                            |                                          |                          |                                     |                                                                                                                                                                                                                                                                                                                                                                                                                                                                                                                             |                                             |                                                                                                                                                                                                                                                                                                                                                                                                                                                                                                                                                     |                                                                                                                           |                                                                                                                                                                                                                                |
| 36 primary care             | Argentina              | 468 (T2D with ≥2 years of DM)                                         | 62.2 (9.0) vs 62.2        | 66.7              | NA                                                                         | 7.7 (1.3) vs 7.8 (1.4) vs                | Median (IQR)             | MDT (diabetologist, CDE, dietitian) | <u>Patient education (42 months):</u><br>Followed PEDNID LA model as described above.                                                                                                                                                                                                                                                                                                                                                                                                                                       | Maximum 10 patients in each group           | <u>Patient modules:</u><br>Followed PEDNID LA model as described above.                                                                                                                                                                                                                                                                                                                                                                                                                                                                             | A medical monitor reviewed                                                                                                | NA                                                                                                                                                                                                                             |

SUPPLEMENTARY DATA

| Study setting                | Country                    | Study population                                                                                                                     | Age*                                      | Female gender (%) | Socio-economic & education status                                                          | Base-line HbA <sub>1c</sub> <sup>a</sup> | DM duration <sup>a</sup>                                          | Personnel involved (overall)  | Frequency & duration of patient/personnel training                                                                                                                                                                                                                                                                                                                                                                                                                            | Patients per group | Curriculum                                                                                                                                                                                                                                                        | Quality assurance                                                                                                                                | Attendance rates/intensity                                                                                                     |
|------------------------------|----------------------------|--------------------------------------------------------------------------------------------------------------------------------------|-------------------------------------------|-------------------|--------------------------------------------------------------------------------------------|------------------------------------------|-------------------------------------------------------------------|-------------------------------|-------------------------------------------------------------------------------------------------------------------------------------------------------------------------------------------------------------------------------------------------------------------------------------------------------------------------------------------------------------------------------------------------------------------------------------------------------------------------------|--------------------|-------------------------------------------------------------------------------------------------------------------------------------------------------------------------------------------------------------------------------------------------------------------|--------------------------------------------------------------------------------------------------------------------------------------------------|--------------------------------------------------------------------------------------------------------------------------------|
| physicians                   |                            | follow-up; 64.6% not on lipid lowering drugs at baseline) Physician education: 117 Patient education: 117 Combined: 117 Control: 117 | (8.4) vs 62.4 (9.1) vs control 62.0 (8.4) |                   |                                                                                            | 7.5 (1.5) vs control 7.8 (1.2)           | 8 (5 to 14) vs 8 (4 to 16) vs 10 (6 to 14) vs Control 9 (5 to 15) |                               | <u>Physician education:</u><br>Received an education book from Argentine Diabetes Society. 25-structured interactive course conducted by trained diabetologist educators to groups of 10–15 physicians. Written evaluation after each module with practical test as final assessment.                                                                                                                                                                                         |                    | <u>5 Physician modules (PROPAT):</u><br>a. diagnosis, classification & socio-economic impact b. associated CV risk factors c. chronic complications d. control, treatment & follow-up e. special conditions                                                       | physician's & patient's performance & the quality of data recorded every 6 months, which were then forwarded to the Central Coordinating Centre. |                                                                                                                                |
| <b>Sperl-Hillen 2013(41)</b> |                            |                                                                                                                                      |                                           |                   |                                                                                            |                                          |                                                                   |                               |                                                                                                                                                                                                                                                                                                                                                                                                                                                                               |                    |                                                                                                                                                                                                                                                                   |                                                                                                                                                  |                                                                                                                                |
| 2 primary health care groups | New Mexico & Minnesota, US | 623 (HbA <sub>1c</sub> ≥7.0%; 27% Hispanic & Blacks & 65% White) IE: 246 GE: 243 Control: 134                                        | 62.0                                      | 49.0              | <high school education: 22.0%                                                              | 8.07 vs 8.11 vs control 8.09             | Mean 11.7 (no SD)                                                 | CDE                           | <u>Patient education (12 months):</u><br>IE: 1-h monthly sessions<br><br><u>GE:</u> four 2-h weekly sessions                                                                                                                                                                                                                                                                                                                                                                  | NA                 | <u>IE - 7 Patient modules (AADE):</u><br>healthy eating, SMBG, medications adherence, problem solving, risk reduction, healthy coping & being active<br><u>GE - US Diabetes Conversation map:</u><br>Overcome barriers to self-management & improve self-efficacy | <u>GE:</u> based on facilitator self-ratings & patient satisfaction scores after each session                                                    | NA                                                                                                                             |
| <b>Blackberry 2013(42)</b>   |                            |                                                                                                                                      |                                           |                   |                                                                                            |                                          |                                                                   |                               |                                                                                                                                                                                                                                                                                                                                                                                                                                                                               |                    |                                                                                                                                                                                                                                                                   |                                                                                                                                                  |                                                                                                                                |
| 59 general practices         | Victoria, Australia        | 473 (HbA <sub>1c</sub> >7.5%; 19% with macrovascular disease; 33% with microvascular disease) Active: 236 Control: 237               | 62.8 (10.5)                               | 43.0              | <u>Unemployed:</u> 8.0%<br><br><u>≤ secondary school education:</u> 84.0%                  | 7.98 (1.22) vs 8.13 (1.34)               | Median (IQR) : 10.0 (5.0 to 14.0)                                 | PN                            | <u>Patient education (15 months):</u><br>5 telephone coaching sessions every 6 weeks in the 1 <sup>st</sup> 6 months, at months 8 and 10; a face-to-face session at 12 months, & a final telephone coaching at 15 months.<br><br><u>PN training:</u><br>2-day training program in telephone coaching.                                                                                                                                                                         | Individual         | <u>Patient modules – COACH model:</u><br>Patient empowerment, risk factors targets & discussion with GPs, action plan, lifestyle changes, medications intensification<br><br><u>PN modules – COACH model:</u><br>Lifestyle & pharmacological management of DM     | Random analysis on recorded telephone coaching sessions. Research team provided 1 visit to the practice, monthly phone calls, & a group meeting. | <u>Median (IQR) number of coaching session:</u><br>3 (1-5)<br><br><u>Median (IQR) duration of each session:</u><br>30 (10-120) |
| <b>Prezio 2013(43)</b>       |                            |                                                                                                                                      |                                           |                   |                                                                                            |                                          |                                                                   |                               |                                                                                                                                                                                                                                                                                                                                                                                                                                                                               |                    |                                                                                                                                                                                                                                                                   |                                                                                                                                                  |                                                                                                                                |
| Urban community clinics      | Texas, US                  | 180 (non-insulin treated Mexican Americans) Active: 90 Control: 90                                                                   | 47.9 (11.0) vs 45.7 (10.7)                | 60.6              | <u>Unemployed, disabled or retired:</u> 60.6%<br><br><u>≤ 12 years of education:</u> 70.6% | 8.9 (2.2) vs 8.7 (2.3)                   | 4.8 (4.6) vs 4.5 (5.6)                                            | Trained CHW, 3 full-time PCPs | <u>Patient education (12 months):</u><br>3-h clinic-based culturally tailored session, 4-h of quarterly case management (Total 7 hours). Received printed educational materials.<br><br><u>CHW training:</u><br>High school equivalent & certification from State of Texas. 12-h of didactic classroom teaching & 5-h of one-to-one training from CDE & dietitian (no contact with study patients). 10-h of one-to-one education from an endocrinologist. Written examination | NA                 | <u>3 patient modules:</u><br>SMBG, meal planning, sick days' rules, medication use, smoking cessation, exercise recommendations, DM complications<br><br><u>CHW modules:</u><br>DM knowledge, dietary assessment, meal planning & technical interviewing skills   | Quarterly data review & analysis, bimonthly research team meeting, weekly tracking of all patients                                               | 82 (92%) patients attended all 7 CoDE program                                                                                  |

SUPPLEMENTARY DATA

| Study setting           | Country                              | Study population                                                                                                                                              | Age*                                             | Female gender (%) | Socio-economic & education status                                                     | Base-line HbA <sub>1c</sub> <sup>a</sup>           | DM duration <sup>a</sup>              | Personnel involved (overall)  | Frequency & duration of patient/personnel training                                                                                                                                                                                                                                                            | Patients per group | Curriculum                                                                                                                                                                                                                                  | Quality assurance                                                                                                                                                                 | Attendance rates/intensity                                                                                                                     |
|-------------------------|--------------------------------------|---------------------------------------------------------------------------------------------------------------------------------------------------------------|--------------------------------------------------|-------------------|---------------------------------------------------------------------------------------|----------------------------------------------------|---------------------------------------|-------------------------------|---------------------------------------------------------------------------------------------------------------------------------------------------------------------------------------------------------------------------------------------------------------------------------------------------------------|--------------------|---------------------------------------------------------------------------------------------------------------------------------------------------------------------------------------------------------------------------------------------|-----------------------------------------------------------------------------------------------------------------------------------------------------------------------------------|------------------------------------------------------------------------------------------------------------------------------------------------|
|                         |                                      |                                                                                                                                                               |                                                  |                   |                                                                                       |                                                    |                                       |                               | & clinical observations before trial began.                                                                                                                                                                                                                                                                   |                    |                                                                                                                                                                                                                                             |                                                                                                                                                                                   |                                                                                                                                                |
| <b>Prezio 2014(44)</b>  |                                      |                                                                                                                                                               |                                                  |                   |                                                                                       |                                                    |                                       |                               |                                                                                                                                                                                                                                                                                                               |                    |                                                                                                                                                                                                                                             |                                                                                                                                                                                   |                                                                                                                                                |
| Urban community clinics | Texas, US                            | 180 (non-insulin treated Mexican Americans) Active: 90 Control: 90                                                                                            | 47.9 (11.0) vs 45.7 (10.7)                       | 60.6              | Unemployed, disabled or retired: 60.6%<br><br>≤ 12 years of education: 70.6%          | 8.9 (2.2) vs 8.7 (2.3)                             | 4.8 (4.6) vs 4.5 (5.6)                | Trained CHW, 3 full-time PCPs | As above                                                                                                                                                                                                                                                                                                      | NA                 | As above                                                                                                                                                                                                                                    | As above                                                                                                                                                                          | As above                                                                                                                                       |
| <b>Prezio 2014(45)</b>  |                                      |                                                                                                                                                               |                                                  |                   |                                                                                       |                                                    |                                       |                               |                                                                                                                                                                                                                                                                                                               |                    |                                                                                                                                                                                                                                             |                                                                                                                                                                                   |                                                                                                                                                |
| Urban community clinics | Texas, US                            | 180 (non-insulin treated Mexican Americans) Active: 90 Control: 90                                                                                            | 47.9 (11.0) vs 45.7 (10.7)                       | 60.6              | Unemployed, disabled or retired: 60.6%<br><br>≤ 12 years of education: 70.6%          | 8.9 (2.2) vs 8.7 (2.3)                             | 4.8 (4.6) vs 4.5 (5.6)                | Trained CHW, 3 full-time PCPs | As above                                                                                                                                                                                                                                                                                                      | NA                 | As above                                                                                                                                                                                                                                    | As above                                                                                                                                                                          | As above                                                                                                                                       |
| <b>Gabbay 2013(46)</b>  |                                      |                                                                                                                                                               |                                                  |                   |                                                                                       |                                                    |                                       |                               |                                                                                                                                                                                                                                                                                                               |                    |                                                                                                                                                                                                                                             |                                                                                                                                                                                   |                                                                                                                                                |
| 12 primary care clinics | 2 health systems at Pennsylvania, US | 545 (Urban underserved high risk T2D, with either HbA <sub>1c</sub> >8.5% BP>140/90, or LDL>3.4 mmol/L; 46.6% White, 38.7% Hispanic) Active: 232 Control: 313 | 58.0 (11.0)                                      | 58.0              | Annual household income <US\$ 35,000: 70.6%<br><br>With some college education: 34.3% | 8.82 (2.38) vs 9.05 (2.27)                         | NA                                    | 3 NCM                         | Patient education (24 months): 1-h sessions with NCM (different days as PCP visits) at baseline, 2 & 6 weeks, then 3, 6 & 12 months, and then at least every 6 months thereafter. Email or phone contacts between visits whenever necessary.<br><br>Nurse training: Bachelor in nursing level. 80-h training. | Individual         | Patient modules: Review of laboratory tests, lifestyle behavior, medications adherence<br><br>Nurse modules: Motivational interview, NCM, DM (didactic, role play, attending conferences or lectures, mock interviews)                      | Weekly to monthly feedback on audiotaped visits by motivational interview experts & a PhD-prepared nurse practitioner. At least biweekly troubleshoot meeting with research team. | Mean number of NCM visits: 5.7 (3.6)<br><br>75 (32%) patients lost engagement with NCM in the last 8 months despite multiple contact attempts. |
| <b>Bosi 2013(47)</b>    |                                      |                                                                                                                                                               |                                                  |                   |                                                                                       |                                                    |                                       |                               |                                                                                                                                                                                                                                                                                                               |                    |                                                                                                                                                                                                                                             |                                                                                                                                                                                   |                                                                                                                                                |
| 39 DM clinics           | Italy                                | 1024 (non-insulin treated T2D with HbA <sub>1c</sub> 7.0-9.0%) Active: 501 Control: 523                                                                       | Median (IQR): 60.2 (55 to 67) vs 60.4 (54 to 68) | 39.7              | NA                                                                                    | Median (IQR): 7.4 (6.9 to 7.8) vs 7.3 (6.9 to 7.8) | Median (IQR): 6.2 (3.2 to 8.8) vs 6.2 | NA                            | Patient education (12 months): Commercially available educational program (Accu-check Educare) was used in both groups.                                                                                                                                                                                       | Individual         | Patient-specific, included charts & other materials to promote patient engagement; on nutrition, exercise, SMBG & medications. Intervention patients had additional training in SMBG interpretation & titration to achieve glucose targets. | NA                                                                                                                                                                                | NA                                                                                                                                             |

SUPPLEMENTARY DATA

| Study setting                | Country                                        | Study population                                                                                                                                          | Age*                                             | Female gender (%) | Socio-economic & education status | Base-line HbA <sub>1c</sub> <sup>a</sup>           | DM duration <sup>a</sup>                           | Personnel involved (overall)                | Frequency & duration of patient/personnel training                                                                                                                                                                                                                                                                                                                                                                                                                                                                                                                                                                        | Patients per group | Curriculum                                                                                                                                                                                                                                                                                                                                                                 | Quality assurance | Attendance rates/intensity |
|------------------------------|------------------------------------------------|-----------------------------------------------------------------------------------------------------------------------------------------------------------|--------------------------------------------------|-------------------|-----------------------------------|----------------------------------------------------|----------------------------------------------------|---------------------------------------------|---------------------------------------------------------------------------------------------------------------------------------------------------------------------------------------------------------------------------------------------------------------------------------------------------------------------------------------------------------------------------------------------------------------------------------------------------------------------------------------------------------------------------------------------------------------------------------------------------------------------------|--------------------|----------------------------------------------------------------------------------------------------------------------------------------------------------------------------------------------------------------------------------------------------------------------------------------------------------------------------------------------------------------------------|-------------------|----------------------------|
|                              |                                                |                                                                                                                                                           |                                                  |                   |                                   |                                                    | (3.4 to 8.8)                                       |                                             |                                                                                                                                                                                                                                                                                                                                                                                                                                                                                                                                                                                                                           |                    |                                                                                                                                                                                                                                                                                                                                                                            |                   |                            |
| <b>Russo 2016(48)</b>        |                                                |                                                                                                                                                           |                                                  |                   |                                   |                                                    |                                                    |                                             |                                                                                                                                                                                                                                                                                                                                                                                                                                                                                                                                                                                                                           |                    |                                                                                                                                                                                                                                                                                                                                                                            |                   |                            |
| 39 DM clinics                | Italy                                          | 1024 (non-insulin treated T2D with HbA <sub>1c</sub> 7.0-9.0%)<br>Active: 501<br>Control: 523                                                             | Median (IQR): 60.2 (55 to 67) vs 60.4 (54 to 68) | 39.7              | NA                                | Median (IQR): 7.4 (6.9 to 7.8) vs 7.3 (6.9 to 7.8) | Median (IQR): 6.2 (3.2 to 8.8) vs 6.2 (3.4 to 8.8) | NA                                          | As above                                                                                                                                                                                                                                                                                                                                                                                                                                                                                                                                                                                                                  | Individual         | As above                                                                                                                                                                                                                                                                                                                                                                   | NA                | NA                         |
| <b>Van den Donk 2013(49)</b> |                                                |                                                                                                                                                           |                                                  |                   |                                   |                                                    |                                                    |                                             |                                                                                                                                                                                                                                                                                                                                                                                                                                                                                                                                                                                                                           |                    |                                                                                                                                                                                                                                                                                                                                                                            |                   |                            |
| 343 general practices        | Cambridge, Leicester, Denmark, The Netherlands | 3057 (screen detected T2D; 94.0% White)<br>a. Cambridge 867<br>b. Leicester 159<br>c. Denmark 1533<br>d. Netherlands 498<br>Active: 1678<br>Control: 1379 | 60.1 (6.9) vs 60.0 (6.9)                         | 42.4              | <u>Employed:</u> 42.3%            | Median (IQR): 6.5 (6.1 to 7.3) vs 6.6 (6.1 to 7.3) | Screen detected                                    | Physicians, DM specialist nurses, dietitian | <u>Cambridge:</u> one 30-min annual review for each patient, 3 additional 10-min consultations with a GP and 3 with a nurse, per year for the 1 <sup>st</sup> 3 years after diagnosis. Provision of educational materials<br><u>Leicester:</u> Structured DESMOND education within 1 <sup>st</sup> 2 months of study, or individual advice from dietician. Provision of 2-monthly peripartetic clinic within 1 <sup>st</sup> year from a DM specialist nurse or physician.<br><u>Denmark &amp; Netherlands:</u> Small group or practice-based educational meetings with PCP & nurses. Provision of educational materials. | Variable           | <u>Cambridge modules:</u> Basics of DM, 5-10% weight loss, exercise, alcohol, medications adherence, SMBG titration, smoking cessation<br><u>Leicester – DESMOND model:</u> Self-management, lifestyle changes (dietary habits, exercise, smoking cessation, SMBG), CV risk factors, medications<br><u>Denmark &amp; Netherlands modules:</u> Lifestyle, treatment targets | NA                | NA                         |
| <b>Simmons 2016(50)</b>      |                                                |                                                                                                                                                           |                                                  |                   |                                   |                                                    |                                                    |                                             |                                                                                                                                                                                                                                                                                                                                                                                                                                                                                                                                                                                                                           |                    |                                                                                                                                                                                                                                                                                                                                                                            |                   |                            |
| 343 general practices        | Cambridge, Leicester, Denmark, The Netherlands | 3057 (screen detected T2D; 94.0% White)<br>a. Cambridge 867<br>b. Leicester 159<br>c. Denmark 1533<br>d. Netherlands 498<br>Active: 1678<br>Control: 1379 | 60.3 (6.9) vs 60.2 (6.8)                         | 42.1              | <u>Employed:</u> 41.0%            | 7.0 (1.6) vs 7.0 (1.5)                             | Screen detected                                    | Physicians, DM specialist nurses, dietitian | As above                                                                                                                                                                                                                                                                                                                                                                                                                                                                                                                                                                                                                  | Variable           | As above                                                                                                                                                                                                                                                                                                                                                                   | NA                | NA                         |
| <b>Herman 2015(51)</b>       |                                                |                                                                                                                                                           |                                                  |                   |                                   |                                                    |                                                    |                                             |                                                                                                                                                                                                                                                                                                                                                                                                                                                                                                                                                                                                                           |                    |                                                                                                                                                                                                                                                                                                                                                                            |                   |                            |
| 343                          | Cambridge,                                     | Risk factors                                                                                                                                              | 60 (7)                                           | 41.0              | NA                                | Median                                             | Screen                                             | Physicians, DM                              | As above                                                                                                                                                                                                                                                                                                                                                                                                                                                                                                                                                                                                                  | Variable           | As above                                                                                                                                                                                                                                                                                                                                                                   | NA                | NA                         |

SUPPLEMENTARY DATA

| Study setting                             | Country                                        | Study population                                                                                                                                                                                                              | Age*                                     | Female gender (%) | Socio-economic & education status                                                                   | Base-line HbA <sub>1c</sub> <sup>a</sup> | DM duration <sup>a</sup>              | Personnel involved (overall)                | Frequency & duration of patient/personnel training                                                                                                  | Patients per group | Curriculum                                                                                                                                                                                                                                                                                                         | Quality assurance                                                     | Attendance rates/intensity                                                                                                                               |
|-------------------------------------------|------------------------------------------------|-------------------------------------------------------------------------------------------------------------------------------------------------------------------------------------------------------------------------------|------------------------------------------|-------------------|-----------------------------------------------------------------------------------------------------|------------------------------------------|---------------------------------------|---------------------------------------------|-----------------------------------------------------------------------------------------------------------------------------------------------------|--------------------|--------------------------------------------------------------------------------------------------------------------------------------------------------------------------------------------------------------------------------------------------------------------------------------------------------------------|-----------------------------------------------------------------------|----------------------------------------------------------------------------------------------------------------------------------------------------------|
| general practices                         | Leicester, Denmark, The Netherlands            | simulated model<br>Active: 1678<br>Control: 1379                                                                                                                                                                              |                                          |                   |                                                                                                     | 6.5% (no IQR)                            | detected                              | specialist nurses, dietitian                |                                                                                                                                                     |                    |                                                                                                                                                                                                                                                                                                                    |                                                                       |                                                                                                                                                          |
| <b>Sandbaek 2014(52)</b>                  |                                                |                                                                                                                                                                                                                               |                                          |                   |                                                                                                     |                                          |                                       |                                             |                                                                                                                                                     |                    |                                                                                                                                                                                                                                                                                                                    |                                                                       |                                                                                                                                                          |
| 343 general practices                     | Cambridge, Leicester, Denmark, The Netherlands | 3057 (screen detected T2D; 94.0% White)<br>a. Cambridge 867<br>b. Leicester 159<br>c. Denmark 1533<br>d. Netherlands 498<br>Active: 1678<br>Control: 1379<br><br>2861 on follow-up<br>Post-active: 1386<br>Post-control: 1048 | 60.3 (6.9) vs 60.2 (6.8)                 | 42.1              | <u>Employed:</u> 41.0%                                                                              | 7.0 (1.6) vs 7.0 (1.5)                   | Screen detected                       | Physicians, DM specialist nurses, dietitian | As above                                                                                                                                            | Variable           | As above                                                                                                                                                                                                                                                                                                           | NA                                                                    | NA                                                                                                                                                       |
| <b>Mons 2013(53)</b>                      |                                                |                                                                                                                                                                                                                               |                                          |                   |                                                                                                     |                                          |                                       |                                             |                                                                                                                                                     |                    |                                                                                                                                                                                                                                                                                                                    |                                                                       |                                                                                                                                                          |
| 38 primary care practices                 | Southwest Germany                              | 204 (HbA <sub>1c</sub> >7.5%; 24.5% had CHD; 15.7% had DN)<br>Active: 103<br>Control: 101                                                                                                                                     | Median (IQR): 68.0 (17.0) vs 67.0 (15.0) | 38.7              | <u>Low education level:</u> 68.6%                                                                   | 8.0 (0.9) vs 8.2 (1.1)                   | Median (IQR): 9.0 (7.5) vs 9.0 (10.0) | PN                                          | <u>Patient education (12 months):</u> Monthly 10-min telephone counselling<br><br><u>Nurse training:</u> Completed 3-year dual vocational training. | Individual         | <u>Patient modules:</u> Medications adherence, lifestyle, problem solving, self-management<br><br>Not specified                                                                                                                                                                                                    | Counselling was based on written manual & standardized questionnaires | <u>Mean number of phone counselling:</u> 92%: 10-12 sessions, 8%: 6-9 sessions                                                                           |
| <b>Crowley 2013(54)</b>                   |                                                |                                                                                                                                                                                                                               |                                          |                   |                                                                                                     |                                          |                                       |                                             |                                                                                                                                                     |                    |                                                                                                                                                                                                                                                                                                                    |                                                                       |                                                                                                                                                          |
| Academic affiliated primary care practice | Durham, US                                     | 359 (low health literacy African Americans; 43.7% had CHD or CKD)<br>Active: 182<br>Control: 177                                                                                                                              | 56.0 (12.0) vs 57.0 (12.0)               | 72.0              | <u>Annual household income &lt;US\$ 10,000:</u> 37.2%<br><br><u>&lt;12 year of education:</u> 30.1% | 8.0 (0.1) for both                       | NA                                    | Nurse centred outside the study sites       | <u>Patient education (12 months):</u> Received culturally-tailored education pamphlets. Monthly nurse-patient telephone calls.                      | NA                 | <u>3 patient modules:</u><br>a. DM management (knowledge, self-monitoring, hypoglycemia& medication use)<br>b. psychosocial determinants of DM control (depression, memory & social support)<br>c. patient-specific behavior change (diet, exercise, smoking cessation, weight loss if BMI >25 kg/m <sup>2</sup> ) | Software-generated education scripts.                                 | <u>Mean number of scheduled calls:</u> 9.9 (3.0) of 12 calls<br><br><u>Mean duration of each call (min):</u> 17.1 (7.3)<br><br>PCP replied to 76% of the |

SUPPLEMENTARY DATA

| Study setting                                  | Country         | Study population                                                                                            | Age*                      | Female gender (%) | Socio-economic & education status                             | Base-line HbA <sub>1c</sub> <sup>a</sup> | DM duration <sup>a</sup> | Personnel involved (overall)     | Frequency & duration of patient/personnel training                                                                                                                                                                                                                                                              | Patients per group                | Curriculum                                                                                                                                                                                                                                                                                                      | Quality assurance                                                                                                                                                                       | Attendance rates/intensity                                                           |
|------------------------------------------------|-----------------|-------------------------------------------------------------------------------------------------------------|---------------------------|-------------------|---------------------------------------------------------------|------------------------------------------|--------------------------|----------------------------------|-----------------------------------------------------------------------------------------------------------------------------------------------------------------------------------------------------------------------------------------------------------------------------------------------------------------|-----------------------------------|-----------------------------------------------------------------------------------------------------------------------------------------------------------------------------------------------------------------------------------------------------------------------------------------------------------------|-----------------------------------------------------------------------------------------------------------------------------------------------------------------------------------------|--------------------------------------------------------------------------------------|
|                                                |                 |                                                                                                             |                           |                   |                                                               |                                          |                          |                                  | <u>Nurse training:</u><br>quarterly electronic nurse-PCP medication management facilitation.                                                                                                                                                                                                                    |                                   | <u>Nurse modules:</u><br>Motivational interviewing, medications adherence, SMBG & home BP monitoring interpretations                                                                                                                                                                                            |                                                                                                                                                                                         | contacts, in which 18% resulted in medications change.                               |
| <b>Mohamed 2013(55)</b>                        |                 |                                                                                                             |                           |                   |                                                               |                                          |                          |                                  |                                                                                                                                                                                                                                                                                                                 |                                   |                                                                                                                                                                                                                                                                                                                 |                                                                                                                                                                                         |                                                                                      |
| 22 primary care practices & hospital DM clinic | Doha, Qatar     | 430 (Arabians with T2D)<br>Active: 215<br>Control: 215                                                      | 52.0 (8.9) vs 55.0 (10.7) | NA                | <high school education:<br>57.9 (22.0) vs 50.0 (15.0) %       | 8.67 (1.50) vs 8.61 (2.9)                | 11.5 (9.0) vs 10.3 (8.4) | Health educators                 | <u>Patient education (12 months):</u><br>GE: Interactive sessions & provision of educational toolkit<br><br><u>Health educators training:</u><br>Not specified                                                                                                                                                  | 10-20 patients per session        | <u>4 patient modules:</u><br>a. etiology of DM, sign & symptoms, complications<br>b. diet, portion control (Idaho plate), goal-setting<br>c. exercise & energy expenditure<br>d. health beliefs, coping skills<br><br><u>Health educators' modules:</u><br>DM self-management, counselling & empowerment skills | Recorded videos were externally reviewed.                                                                                                                                               | NA                                                                                   |
| <b>Liu 2012(56)</b>                            |                 |                                                                                                             |                           |                   |                                                               |                                          |                          |                                  |                                                                                                                                                                                                                                                                                                                 |                                   |                                                                                                                                                                                                                                                                                                                 |                                                                                                                                                                                         |                                                                                      |
| 3 general practices                            | Shanghai, China | 208 (rural T2D; 13.0% had cardiovascular renal complications)<br>Active: 119<br>Control: 89                 | 62.0 (9.8) vs 62.5 (10.0) | 62.0              | <u>Mean years of education:</u><br>6.22 (4.43) vs 6.08 (4.77) | NA                                       | NA                       | GP, preventive doctor, nurse, PL | <u>Patient education (12 months):</u><br>12 monthly sessions & one-to-one session post GE for behavioral counselling, prescription & ordering referrals/tests (1-h in length).<br><br><u>Personnel training:</u><br>1-day training workshop. Alternative leading the patient module based on area of expertise. | 1 PL to 20-25 patients per group  | <u>Patient modules:</u><br>Self-management (goal-setting, weekly action plan, meal planning, exercise, medications including insulin, hypoglycemia, DM foot care, understanding the blood tests results<br><br>Not specified                                                                                    | NA                                                                                                                                                                                      | <u>Mean number of attended sessions:</u><br>10.1 of 12 (75.6% attended ≥10 sessions) |
| <b>Trief 2013(57)</b>                          |                 |                                                                                                             |                           |                   |                                                               |                                          |                          |                                  |                                                                                                                                                                                                                                                                                                                 |                                   |                                                                                                                                                                                                                                                                                                                 |                                                                                                                                                                                         |                                                                                      |
| Urban & rural primary care practices           | New York, US    | 1665 (Under-served T2D aged ≥55 years; 49.4% White, 50.1% Black or Hispanic)<br>Active: 844<br>Control: 821 | 70.82 (6.63)              | 62.82             | <u>Mean years of education:</u><br>9.77 (4.12)                | 7.38 (1.54)                              | 11.09 (9.38)             | 4 NCM, dietitians                | <u>Patient education (12 months):</u><br>Bilingual educational webpage (regular & low literacy versions), videoconferencing,                                                                                                                                                                                    | Individual, group (not specified) | Not specified                                                                                                                                                                                                                                                                                                   | Daily supervision of NCM by an endocrinologist<br><br>Use of HTU were logged (contacts with NCM, the project Web page/chat room, frequency of patient's views on own clinical database) | NA                                                                                   |
| <b>Weinstock 2011(58)</b>                      |                 |                                                                                                             |                           |                   |                                                               |                                          |                          |                                  |                                                                                                                                                                                                                                                                                                                 |                                   |                                                                                                                                                                                                                                                                                                                 |                                                                                                                                                                                         |                                                                                      |
| Urban & rural primary care practices           | New York, US    | 1665 (Under-served T2D aged ≥55 years; 49.4% White, 50.1% Black or                                          | 70.82 (6.63)              | 62.82             | <u>Mean years of education:</u><br>9.77 (4.12)                | 7.38 (1.54)                              | 11.09 (9.38)             | 4 NCM, dietitians                | As above                                                                                                                                                                                                                                                                                                        | Individual, group (not specified) | Not specified                                                                                                                                                                                                                                                                                                   | As above                                                                                                                                                                                | NA                                                                                   |

SUPPLEMENTARY DATA

| Study setting                                   | Country             | Study population                                                                                                                                              | Age*                                                  | Female gender (%) | Socio-economic & education status                                                                    | Base-line HbA <sub>1c</sub> <sup>a</sup>        | DM duration <sup>a</sup> | Personnel involved (overall)                 | Frequency & duration of patient/personnel training                                                                                                                                                                                                                                                                                                                                                                                                                                                                                                                          | Patients per group       | Curriculum                                                                                                                                                                                                                                                                                                                      | Quality assurance                                      | Attendance rates/intensity                                                                                                                   |
|-------------------------------------------------|---------------------|---------------------------------------------------------------------------------------------------------------------------------------------------------------|-------------------------------------------------------|-------------------|------------------------------------------------------------------------------------------------------|-------------------------------------------------|--------------------------|----------------------------------------------|-----------------------------------------------------------------------------------------------------------------------------------------------------------------------------------------------------------------------------------------------------------------------------------------------------------------------------------------------------------------------------------------------------------------------------------------------------------------------------------------------------------------------------------------------------------------------------|--------------------------|---------------------------------------------------------------------------------------------------------------------------------------------------------------------------------------------------------------------------------------------------------------------------------------------------------------------------------|--------------------------------------------------------|----------------------------------------------------------------------------------------------------------------------------------------------|
| <b>Nishita 2013(59)</b>                         |                     |                                                                                                                                                               |                                                       |                   |                                                                                                      |                                                 |                          |                                              |                                                                                                                                                                                                                                                                                                                                                                                                                                                                                                                                                                             |                          |                                                                                                                                                                                                                                                                                                                                 |                                                        |                                                                                                                                              |
| Primary care practices                          | Island of O'ahu, US | 190 (85.8% T2D; Asians 36%; Native Hawaiian/Pacific Islanders 35%; White 17.4%)<br>Active: 128<br>Control: 62                                                 | Mean (SE)<br>48.46 (0.71)                             | 62.63             | Low socio-economic status<br><br><4 years of college education:<br>49.47%                            | 7.76 (0.12)                                     | 8.13 (0.61)              | 9 trained life coaches, 5 retail pharmacists | <u>Patient education (12 months):</u><br>Separate sessions with life coach & pharmacist (1-h & 45-min in length respectively). Frequency of contact was based on patients' needs. Had access to fitness club membership.<br><br><u>Life coach training:</u><br>65-h training model developed by the research team. Monthly trainings on other coaching topics, attended coaching conferences & accessed online diabetes self-management materials<br><br><u>Pharmacist training:</u><br>Certification of pharmaceutical care in diabetes after completion of 17-h training. | NA                       | <u>Patient modules:</u><br>lifestyle changes, DM-related health behavior, goal-setting/action plan, problem solving, medications management<br><br><u>Life coach modules:</u><br>DM, self-management strategies<br><br><u>Pharmacist modules:</u><br>Medication management, diet, exercise                                      | Periodic one-on-one meetings with certified life coach | 94% of intervention group patients attended an average of 10 sessions with life coach.<br>- 87% attended on average 4 pharmacist's sessions. |
| <b>Flamm 2012(60)</b>                           |                     |                                                                                                                                                               |                                                       |                   |                                                                                                      |                                                 |                          |                                              |                                                                                                                                                                                                                                                                                                                                                                                                                                                                                                                                                                             |                          |                                                                                                                                                                                                                                                                                                                                 |                                                        |                                                                                                                                              |
| Primary care practices of 6 clusters            | Austria             | <u>1<sup>st</sup> year:</u><br>1489<br><br><u>2<sup>nd</sup> year:</u><br>1072 (801 analysed)<br>DMP/DMP:<br>414<br>DMP/Control : 440<br>Control/Control: 218 | 65.13 (10.20)<br>vs 64.26 (10.61)<br>vs 67.53 (10.24) | 47.2              | NA                                                                                                   | 7.40 (1.48)<br>vs 7.32 (1.37)<br>vs 7.14 (1.11) | NA                       | MDT                                          | <u>Patient education (12 months):</u><br>9-h training by physicians<br><br><u>Physician training:</u><br>Mandatory 10-h in person training course                                                                                                                                                                                                                                                                                                                                                                                                                           | 3-12 patients each group | <u>4 patient modules:</u><br>Self-management, goal-setting, lifestyle modifications, medications adherence<br><br><u>Physician modules:</u><br>Updates on DM care, treatment guidelines, practice management training                                                                                                           | NA                                                     | NA                                                                                                                                           |
| <b>Sönnichsen 2010(61)</b>                      |                     |                                                                                                                                                               |                                                       |                   |                                                                                                      |                                                 |                          |                                              |                                                                                                                                                                                                                                                                                                                                                                                                                                                                                                                                                                             |                          |                                                                                                                                                                                                                                                                                                                                 |                                                        |                                                                                                                                              |
| Primary care practices of 6 clusters            | Austria             | 1489<br>Active: 649<br>Control: 840                                                                                                                           | 65.4 (10.4)<br>vs 65.5 (10.4)                         | 47.8              | NA                                                                                                   | 7.46 (1.53)<br>vs 7.34 (1.31)                   | NA                       | MDT                                          | As above                                                                                                                                                                                                                                                                                                                                                                                                                                                                                                                                                                    | As above                 | As above                                                                                                                                                                                                                                                                                                                        | As above                                               | As above                                                                                                                                     |
| <b>Glasgow 2012(62)</b>                         |                     |                                                                                                                                                               |                                                       |                   |                                                                                                      |                                                 |                          |                                              |                                                                                                                                                                                                                                                                                                                                                                                                                                                                                                                                                                             |                          |                                                                                                                                                                                                                                                                                                                                 |                                                        |                                                                                                                                              |
| 5 primary care clinics within Kaiser Permanente | Colorado, US        | 463 (T2D with BMI >25 kg/m <sup>2</sup> & at least 1 other CV risk factor; 72.0% White, 15.4% Black or African Americans)<br>CASM+: 162                       | 58.4 (9.2)                                            | 49.8              | <u>Annual household income &lt;US\$ 50,000:</u> 47.3%<br><br><u>&lt;High school education:</u> 19.1% | NA                                              | NA                       | Care coordinators, physician, dietitian      | <u>Patient education (12 months):</u><br>CASM: Online access to specific website. Periodic computer-generated motivational calls & prompts<br><br><u>CASM+:</u> 2 follow up calls from a team member at 2- and 8-weeks after initial visit. 3 groups visits (120-min in length)                                                                                                                                                                                                                                                                                             | NA                       | <u>CASM modules:</u><br>Online forum & community resources, personalized action plan on healthy lifestyle & medications adherence, self-efficacy<br><br><u>CASM+ modules:</u><br>Patient-physician/dietician interaction on healthy eating (grocery shopping tips), understanding assessment results, facilitate social support | NA                                                     | <u>Website use:</u><br>11 log-ins initially, but declined to 3 at 12 months                                                                  |

SUPPLEMENTARY DATA

| Study setting             | Country                                        | Study population                                                                                                                                          | Age*                       | Female gender (%) | Socio-economic & education status | Base-line HbA <sub>1c</sub> <sup>a</sup> | DM duration <sup>a</sup> | Personnel involved (overall)                    | Frequency & duration of patient/personnel training                                                                                                                                                                                                                                                                                                                                                                                                                                                                                                                                                                                        | Patients per group                | Curriculum                                                                                                                                                                                                                                                                                                                                                                                  | Quality assurance | Attendance rates/intensity |
|---------------------------|------------------------------------------------|-----------------------------------------------------------------------------------------------------------------------------------------------------------|----------------------------|-------------------|-----------------------------------|------------------------------------------|--------------------------|-------------------------------------------------|-------------------------------------------------------------------------------------------------------------------------------------------------------------------------------------------------------------------------------------------------------------------------------------------------------------------------------------------------------------------------------------------------------------------------------------------------------------------------------------------------------------------------------------------------------------------------------------------------------------------------------------------|-----------------------------------|---------------------------------------------------------------------------------------------------------------------------------------------------------------------------------------------------------------------------------------------------------------------------------------------------------------------------------------------------------------------------------------------|-------------------|----------------------------|
|                           |                                                | CASM: 169<br>Control: 132                                                                                                                                 |                            |                   |                                   |                                          |                          |                                                 |                                                                                                                                                                                                                                                                                                                                                                                                                                                                                                                                                                                                                                           |                                   |                                                                                                                                                                                                                                                                                                                                                                                             |                   |                            |
| <b>Simmons 2012(63)</b>   |                                                |                                                                                                                                                           |                            |                   |                                   |                                          |                          |                                                 |                                                                                                                                                                                                                                                                                                                                                                                                                                                                                                                                                                                                                                           |                                   |                                                                                                                                                                                                                                                                                                                                                                                             |                   |                            |
| 343 general practices     | Cambridge, Leicester, Denmark, The Netherlands | 3057 (screen detected T2D; 94.0% White)<br>a. Cambridge 867<br>b. Leicester 159<br>c. Denmark 1533<br>d. Netherlands 498<br>Active: 1678<br>Control: 1379 | 60.3 (6.9) vs 60.2 (6.8)   | 42.1              | <u>Employed:</u> 41.0%            | 7.0 (1.6) vs 7.0 (1.5)                   | Screen detected          | Physicians, DM specialist nurses, dietitian     | <u>Cambridge:</u><br>one 30-min annual review for each patient, 3 additional 10-min consultations with a GP and 3 with a nurse, per year for the 1 <sup>st</sup> 3 years after diagnosis. Provision of educational materials<br><br><u>Leicester:</u><br>Structured DESMOND education within 1 <sup>st</sup> 2 months of study, or individual advice from dietitian. Provision of 2-monthly peripatetic clinic within 1 <sup>st</sup> year from a DM specialist nurse or physician.<br><br><u>Denmark &amp; Netherlands:</u><br>Small group or practice-based educational meetings with PCP & nurses. Provision of educational materials. | Variable                          | <u>Cambridge modules:</u><br>Basics of DM, 5-10% weight loss, exercise, alcohol, medications adherence, SMBG titration, smoking cessation<br><br><u>Leicester – DESMOND model:</u><br>Self-management, lifestyle changes (dietary habits, exercise, smoking cessation, SMBG), CV risk factors, medications<br><br><u>Denmark &amp; Netherlands modules:</u><br>Lifestyle, treatment targets | NA                | NA                         |
| <b>Griffin 2011(64)</b>   |                                                |                                                                                                                                                           |                            |                   |                                   |                                          |                          |                                                 |                                                                                                                                                                                                                                                                                                                                                                                                                                                                                                                                                                                                                                           |                                   |                                                                                                                                                                                                                                                                                                                                                                                             |                   |                            |
| 343 general practices     | Cambridge, Leicester, Denmark, The Netherlands | 3057 (screen detected T2D; 94.0% White)<br>a. Cambridge 867<br>b. Leicester 159<br>c. Denmark 1533<br>d. Netherlands 498<br>Active: 1678<br>Control: 1379 | 60.3 (6.9) vs 60.2 (6.8)   | 42.1              | <u>Employed:</u> 41.0%            | 7.0 (1.6) vs 7.0 (1.5)                   | Screen detected          | Physicians, DM specialist nurses, dietitian     | As above                                                                                                                                                                                                                                                                                                                                                                                                                                                                                                                                                                                                                                  | Variable                          | As above                                                                                                                                                                                                                                                                                                                                                                                    | NA                | NA                         |
| <b>Webb 2012(65)</b>      |                                                |                                                                                                                                                           |                            |                   |                                   |                                          |                          |                                                 |                                                                                                                                                                                                                                                                                                                                                                                                                                                                                                                                                                                                                                           |                                   |                                                                                                                                                                                                                                                                                                                                                                                             |                   |                            |
| 20 primary care practices | Leicester, UK                                  | 345 (screen detected T2D; 12.8% had CHD;                                                                                                                  | 59.4 (10.0) vs 60.0 (10.0) | 42.3              | NA                                | 7.2 (1.5) vs 7.3 (1.8)                   | Screen detected          | Specialty doctors, DM nurse educator, dietitian | <u>Patient education (12 months):</u><br>Structured DESMOND education within 1 <sup>st</sup> 2 months of study, or individual advice from dietitian. Provision of 2-monthly peripatetic                                                                                                                                                                                                                                                                                                                                                                                                                                                   | Individual, group (not specified) | <u>Leicester – DESMOND model:</u><br>Self-management, lifestyle changes (dietary habits, exercise, smoking cessation, SMBG), CV risk factors, medications                                                                                                                                                                                                                                   | NA                | NA                         |



SUPPLEMENTARY DATA

| Study setting                                     | Country               | Study population                                                                                                                                 | Age*                     | Female gender (%) | Socio-economic & education status                                        | Base-line HbA <sub>1c</sub> <sup>a</sup>                                                                    | DM duration <sup>a</sup>         | Personnel involved (overall)                                      | Frequency & duration of patient/personnel training                                                                                                                                                                                                                                                                                                                           | Patients per group       | Curriculum                                                                                                                                                                                | Quality assurance | Attendance rates/intensity                                                                                                                                                                        |
|---------------------------------------------------|-----------------------|--------------------------------------------------------------------------------------------------------------------------------------------------|--------------------------|-------------------|--------------------------------------------------------------------------|-------------------------------------------------------------------------------------------------------------|----------------------------------|-------------------------------------------------------------------|------------------------------------------------------------------------------------------------------------------------------------------------------------------------------------------------------------------------------------------------------------------------------------------------------------------------------------------------------------------------------|--------------------------|-------------------------------------------------------------------------------------------------------------------------------------------------------------------------------------------|-------------------|---------------------------------------------------------------------------------------------------------------------------------------------------------------------------------------------------|
|                                                   |                       | 58.3% White Europeans, 40.0% South Asians)<br>Active: 146<br>Control: 199                                                                        |                          |                   |                                                                          |                                                                                                             |                                  |                                                                   | clinic within 1 <sup>st</sup> year from a DM specialist nurse or physician.                                                                                                                                                                                                                                                                                                  |                          |                                                                                                                                                                                           |                   |                                                                                                                                                                                                   |
| <b>Rubak 2011(66)</b>                             |                       |                                                                                                                                                  |                          |                   |                                                                          |                                                                                                             |                                  |                                                                   |                                                                                                                                                                                                                                                                                                                                                                              |                          |                                                                                                                                                                                           |                   |                                                                                                                                                                                                   |
| 78 primary care practices                         | Denmark               | 628 (screen detected T2D aged 40-69 years)<br>Active: 307<br>Control: 321                                                                        | 61.0                     | 42.0              | NA                                                                       | Mean 6.9 vs 6.8 (no SD)                                                                                     | Screen detected                  | GP                                                                | <u>GP training:</u><br>1.5-day training & 2 half-day follow up during the 1 <sup>st</sup> year                                                                                                                                                                                                                                                                               | NA                       | <u>GP modules:</u><br>Motivational interview, intensive DM treatment                                                                                                                      | NA                | NA                                                                                                                                                                                                |
| <b>van den Donk 2010(67)</b>                      |                       |                                                                                                                                                  |                          |                   |                                                                          |                                                                                                             |                                  |                                                                   |                                                                                                                                                                                                                                                                                                                                                                              |                          |                                                                                                                                                                                           |                   |                                                                                                                                                                                                   |
| 79 primary care practices                         | Southwest Netherlands | 498 (screen detected T2D; 98.4% White)<br>Active: 255<br>Control: 243                                                                            | 60.1 (5.4) vs 59.9 (5.1) | 46.2              | NA                                                                       | 7.3 (1.6) vs 7.4 (1.7)                                                                                      | Screen detected                  | GP, DM nurse                                                      | <u>Personnel training:</u><br>GP: 3-h session<br>DM nurse: 2-h sessions every 3 months                                                                                                                                                                                                                                                                                       | NA                       | Intensive treatment of DM, hypertension, dyslipidaemia, structured lifestyle education (diet, weight loss, exercise, smoking cessation, medications adherence)                            | NA                | NA                                                                                                                                                                                                |
| <b>Janssen 2009(68)</b>                           |                       |                                                                                                                                                  |                          |                   |                                                                          |                                                                                                             |                                  |                                                                   |                                                                                                                                                                                                                                                                                                                                                                              |                          |                                                                                                                                                                                           |                   |                                                                                                                                                                                                   |
| 79 primary care practices                         | Southwest Netherlands | 498 (screen detected T2D; 98.4% White)<br>Active: 255<br>Control: 243                                                                            | 60.1 (5.4) vs 59.9 (5.1) | 46.2              | NA                                                                       | 7.3 (1.6) vs 7.4 (1.7)                                                                                      | Screen detected                  | GP, DM nurse                                                      | As above                                                                                                                                                                                                                                                                                                                                                                     | NA                       | As above                                                                                                                                                                                  | NA                | NA                                                                                                                                                                                                |
| <b>Rygg 2012(69)</b>                              |                       |                                                                                                                                                  |                          |                   |                                                                          |                                                                                                             |                                  |                                                                   |                                                                                                                                                                                                                                                                                                                                                                              |                          |                                                                                                                                                                                           |                   |                                                                                                                                                                                                   |
| 2 hospitals                                       | Norway                | 146 (White Norwegians; T2D with ≥3 years GP follow-up)<br>Active: 73<br>Control: 73                                                              | Mean 66.0 (no SD)        | 45.0              | <u>College or university education:</u><br>27.0%                         | 7.1 (1.4) vs 6.9 (1.3)                                                                                      | Median (IQR) : 5.0 (2.5 to 10.0) | MDT (physician, DM nurse, physiotherapist, dietitian, trained PL) | <u>Patient education (12 months):</u><br>15-h over 3 sessions at 1-2 weeks' intervals<br><br><u>DM nurse training:</u><br>4-14 years of experience                                                                                                                                                                                                                           | 8-10 patients each group | <u>Patient modules:</u><br>T2D & its complications, diet, physical activity, problem solving.<br><br>Not specified                                                                        | NA                | NA                                                                                                                                                                                                |
| <b>McMahon 2012(70)</b>                           |                       |                                                                                                                                                  |                          |                   |                                                                          |                                                                                                             |                                  |                                                                   |                                                                                                                                                                                                                                                                                                                                                                              |                          |                                                                                                                                                                                           |                   |                                                                                                                                                                                                   |
| Veteran affairs health care system (primary care) | Boston, US            | 151 (HbA <sub>1c</sub> ≥8.5%; 74.2% non-Hispanic White, 12.6% non-Hispanic Black, 9.3% Hispanic)<br>Online: 51<br>Phone: 51<br>Web (control): 49 | 60.2 (10.8)              | 5.3               | <u>Retired:</u><br>57.0%<br><br><u>&lt;high school graduate:</u><br>9.5% | <u>Online:</u><br>9.6 (1.0)<br><br><u>Phone:</u><br>9.9 (1.2)<br><br><u>Web (usual care):</u><br>10.1 (1.4) | ≥10 years:<br>49.3%              | CDE (advanced PN, clinical pharmacist)                            | <u>Patient education (12 months):</u><br><u>Phone:</u> biweekly phone calls to review glucose/BP records<br><br><u>Online:</u> at least biweekly log-ins to upload glucose/BP data. CDE assigned educational modules after reviewing patients' records. Phone reminders if absence of log-ins for 2 weeks.<br><br><u>Web:</u> utilization was based on patient's discretion. | NA                       | <u>Patient modules:</u><br>Lifestyle & nutrition modifications, medications management<br><br><br><u>Web modules:</u><br>websites with vetted contents on peer-sharing & mutual contents. | NA                | <u>Mean number of successful phone contacts (months):</u><br>≤6: 52%,<br>7-9: 37%<br>>9: 10%<br><br><u>Mean number of successful online contacts (months):</u><br>≤6: 42%,<br>7-9: 47%<br>>9: 12% |

SUPPLEMENTARY DATA

| Study setting                     | Country                     | Study population                                                                                                            | Age*                       | Female gender (%) | Socio-economic & education status    | Base-line HbA <sub>1c</sub> <sup>a</sup> | DM duration <sup>a</sup> | Personnel involved (overall)       | Frequency & duration of patient/personnel training                                                                                                                          | Patients per group                | Curriculum                                                                                                                                                                                                                                                                 | Quality assurance                                                                                      | Attendance rates/intensity                                                                                                                                                                    |
|-----------------------------------|-----------------------------|-----------------------------------------------------------------------------------------------------------------------------|----------------------------|-------------------|--------------------------------------|------------------------------------------|--------------------------|------------------------------------|-----------------------------------------------------------------------------------------------------------------------------------------------------------------------------|-----------------------------------|----------------------------------------------------------------------------------------------------------------------------------------------------------------------------------------------------------------------------------------------------------------------------|--------------------------------------------------------------------------------------------------------|-----------------------------------------------------------------------------------------------------------------------------------------------------------------------------------------------|
|                                   |                             |                                                                                                                             |                            |                   |                                      |                                          |                          |                                    |                                                                                                                                                                             |                                   |                                                                                                                                                                                                                                                                            |                                                                                                        | Mean number of log-ins (months):<br>≤6: 32%,<br>7-9: 25%<br>>9: 43%                                                                                                                           |
| <b>Fisher 2012(71)</b>            |                             |                                                                                                                             |                            |                   |                                      |                                          |                          |                                    |                                                                                                                                                                             |                                   |                                                                                                                                                                                                                                                                            |                                                                                                        |                                                                                                                                                                                               |
| 34 primary care practices         | Eastern US                  | 483 (Insulin naïve T2D with HbA <sub>1c</sub> 7.5-12.0%; 63.1% Caucasians. 31.1% African American) Active: 256 Control: 227 | 55.8 (10.7)                | 46.8              | No college education: 52.7%          | 8.9 (1.2)                                | 7.6 (6.1)                | Physician & staffs (not specified) | Patient education (12 months): SMBG uploads to Accucheck 360 <sup>0</sup> for 3 consecutive days every 3 months<br><br>Personnel training: Regular contacts (not specified) | NA                                | Patient modules: Recognition of problematic glycaemic patterns, changes in portion size, physical activity level & meal compositions.<br><br>Personnel modules: Interpretation of Accucheck 360 <sup>0</sup> data                                                          | All physicians in intervention were contacted regularly over 12 months to ensure consistency over time | Mean number of daily blood glucose test (including Accucheck 360 <sup>0</sup> profiles): 0.77 (0.69) vs 1.05 (0.80), p<0.0001                                                                 |
| <b>Polonsky 2011(72)</b>          |                             |                                                                                                                             |                            |                   |                                      |                                          |                          |                                    |                                                                                                                                                                             |                                   |                                                                                                                                                                                                                                                                            |                                                                                                        |                                                                                                                                                                                               |
| 34 primary care practices         | Eastern US                  | 483 (Insulin naïve T2D with HbA <sub>1c</sub> 7.5-12.0%; 63.1% Caucasians. 31.1% African American) Active: 256 Control: 227 | 55.8 (10.7)                | 46.8              | No college education: 52.7%          | 8.9 (1.2)                                | 7.6 (6.1)                | Physician & staffs (not specified) | As above                                                                                                                                                                    | NA                                | As above                                                                                                                                                                                                                                                                   | As above                                                                                               | As above                                                                                                                                                                                      |
| <b>Estrada 2011(73)</b>           |                             |                                                                                                                             |                            |                   |                                      |                                          |                          |                                    |                                                                                                                                                                             |                                   |                                                                                                                                                                                                                                                                            |                                                                                                        |                                                                                                                                                                                               |
| 205 PCPs                          | 11 South-eastern states, US | 1182 (16.6% African Americans; 18.0% CHD; 14.0% depression) Active: 715 Control: 467                                        | 58.7 (13.6) vs 60.6 (13.8) | 49.9              | On insurance or Medicaid: 116 (9.8%) | NA                                       | NA                       | PCP                                | Personnel education (24 months): Case-based learning at website. Email reminders every 1-3 weeks on website updates.                                                        | NA                                | practical goals/guidelines, guidance for quality improvement & systems redesign, CME credits tracking                                                                                                                                                                      | NA                                                                                                     | Median duration of website visit (mins): 37 (16-66) vs 5 (3-18)                                                                                                                               |
| <b>Craeto 2011(74)</b>            |                             |                                                                                                                             |                            |                   |                                      |                                          |                          |                                    |                                                                                                                                                                             |                                   |                                                                                                                                                                                                                                                                            |                                                                                                        |                                                                                                                                                                                               |
| Primary care & specialist clinics | Leicester-shire, UK         | 189 (T2D with micro-albuminuria; 20.1% CHD; 68.3% White Europeans, 27.5% South Asians) Active: 94 Control: 95               | 61.5 (10.5)                | 24.3              | NA                                   | 7.9 (1.4) vs 8.0 (1.6)                   | 11.5 (9.3)               | CDE                                | Patient education (18 months): GE & one-on-one meetings every 3 months. Each patient had a DM record book.                                                                  | Individual, group (8-10 patients) | Patient modules - DESMOND model: Basics of DM, lifestyle changes (healthy eating, physical activity, medication adherence), natural history of microalbuminuria, CV risk factors identification & modifications. Additional group insulin management session if indicated. | DESMOND educators were part of quality assurance program.                                              | 96% attended initial education class, 73% had at least one extra session, 61% attended >1 session.<br><br>Insulin-treated patients: 27/46 (58%) attended initial insulin session, 34/57 (59%) |

SUPPLEMENTARY DATA

| Study setting                    | Country                | Study population                                                                                                                         | Age*                                         | Female gender (%) | Socio-economic & education status                                                                                                             | Base-line HbA <sub>1c</sub> <sup>a</sup>    | DM duration <sup>a</sup>          | Personnel involved (overall)                                                                         | Frequency & duration of patient/personnel training                                                                                                                                                                                                                                              | Patients per group                | Curriculum                                                                                                                                                                                                                                                                                                                                                                                                        | Quality assurance                                                                                     | Attendance rates/intensity                                                                                                                                                              |
|----------------------------------|------------------------|------------------------------------------------------------------------------------------------------------------------------------------|----------------------------------------------|-------------------|-----------------------------------------------------------------------------------------------------------------------------------------------|---------------------------------------------|-----------------------------------|------------------------------------------------------------------------------------------------------|-------------------------------------------------------------------------------------------------------------------------------------------------------------------------------------------------------------------------------------------------------------------------------------------------|-----------------------------------|-------------------------------------------------------------------------------------------------------------------------------------------------------------------------------------------------------------------------------------------------------------------------------------------------------------------------------------------------------------------------------------------------------------------|-------------------------------------------------------------------------------------------------------|-----------------------------------------------------------------------------------------------------------------------------------------------------------------------------------------|
| <b>Sherifali 2011(75)</b>        |                        |                                                                                                                                          |                                              |                   |                                                                                                                                               |                                             |                                   |                                                                                                      |                                                                                                                                                                                                                                                                                                 |                                   |                                                                                                                                                                                                                                                                                                                                                                                                                   |                                                                                                       |                                                                                                                                                                                         |
| Primary care practices           | Hamilton, Canada       | 465 (aged ≥40 years with HbA <sub>1c</sub> ≥7%; 61.3% White)<br>Active: 233<br>Control: 232                                              | 62.0 (11.0)                                  | 51.2              | <high school education:<br>51.0%                                                                                                              | 7.85 (0.88) vs 7.81 (0.83)                  | 13.0 (10.0) vs 13.0 (9.0)         | Project staffs (not specified)                                                                       | <u>Patient education (12 months):</u><br>Patient-specific computer-generated educational messages                                                                                                                                                                                               | Individual                        | Metabolic control & treatment targets, smoking cessation, foot care, community resources                                                                                                                                                                                                                                                                                                                          | Written communication between project staffs & patients were sent to PCP                              | NA                                                                                                                                                                                      |
| <b>Rosal 2011(76)</b>            |                        |                                                                                                                                          |                                              |                   |                                                                                                                                               |                                             |                                   |                                                                                                      |                                                                                                                                                                                                                                                                                                 |                                   |                                                                                                                                                                                                                                                                                                                                                                                                                   |                                                                                                       |                                                                                                                                                                                         |
| Community health centres         | Texas & California, US | 252 (low-income Latinos with HbA <sub>1c</sub> ≥7.5%; 67.7% hypertension, 74.9% obesity)<br>Active: 124<br>Control: 128                  | <u>Aged ≥55 years:</u><br>53.9%              | 76.6              | <u>Disabled:</u><br>61.7%<br><br><u>&lt;High school education:</u><br>75.2%                                                                   | 8.98 (1.9)                                  | <u>&gt;10 years:</u><br>44.4%     | MDT (dietitian or health educator & trained PL, or 3 trained PL with supervision of 2 investigators) | <u>Patient education (12 months):</u><br><u>IE:</u> 1-h home visit at initiation<br><br><u>GE:</u> 12 weekly intensive phase → 8 monthly maintenance phase (2.5-h in length each at community centres)                                                                                          | Individual, group (not specified) | DM knowledge, self-efficacy & confidence, self-management behaviour, hands-on experience (cooking lessons, bingo games), goal-setting, problem-solving                                                                                                                                                                                                                                                            | NA                                                                                                    | <u>Attendance rates:</u><br><u>Intensive phase:</u><br>68% attended ≥6/12 sessions, 10% attended none<br><br><u>Maintenance phase:</u><br>18% attended ≥4/8 sessions, 27% attended none |
| <b>Allen 2011(77)</b>            |                        |                                                                                                                                          |                                              |                   |                                                                                                                                               |                                             |                                   |                                                                                                      |                                                                                                                                                                                                                                                                                                 |                                   |                                                                                                                                                                                                                                                                                                                                                                                                                   |                                                                                                       |                                                                                                                                                                                         |
| 2 urban community health centres | US                     | 525 (79.4% Black; T2D with HbA <sub>1c</sub> ≥7% or CHD or non-diabetes with suboptimal BP/lipid control)<br>Active: 261<br>Control: 264 | 54.3 (12.0) vs 54.7 (11.5)                   | 71.2              | <u>Unemployed:</u><br>60.0%<br><br><u>Annual household income &lt;US\$ 20,000:</u><br>54.5%<br><br><u>&lt;High school education:</u><br>32.4% | 8.9 (2.2) vs 8.3 (1.9)                      | NA                                | PN, trained CHW                                                                                      | <u>Patient education (12 months):</u><br>Separate sessions with PN & CHW. Frequency & intensity of education was patient-specific. Phone follow-up between visits. Low literacy Wellness Guide was developed by study team.<br><br><u>Personnel training:</u><br>PN & CHW training before study | Individual, group (not specified) | <u>Patient modules:</u><br>Medications adherence & titration, behavioral counselling, lifestyle modification (low fat, low sodium diet; smoking cessation; exercise program), identification of barriers & strategies<br><br><u>Personnel modules:</u><br>PN: management of DM, hypertension, dyslipidemia; motivational interview<br>CHW: pathophysiology of DM, diet, physical activity, motivational interview | Quarterly quality assurance assessment (analysis of audiotaped sessions & intervention documentation) | 70% had ≥4 in-person visits with PN.<br><br><u>Mean number of sessions with PN/CHW team:</u><br>In-person: 7 (3)<br>Phone: 6 (5)                                                        |
| <b>Quinn 2011(78)</b>            |                        |                                                                                                                                          |                                              |                   |                                                                                                                                               |                                             |                                   |                                                                                                      |                                                                                                                                                                                                                                                                                                 |                                   |                                                                                                                                                                                                                                                                                                                                                                                                                   |                                                                                                       |                                                                                                                                                                                         |
| 26 primary care practices        | Maryland, US           | 163 (T2D with HbA <sub>1c</sub> ≥7.5%; 52.8% non-Hispanic White, 39.3%                                                                   | CPDS 52 (8.0), CPP 53.7 (8.2), CO 52.8 (8.0) | 50.3              | <high school education:<br>30.1%                                                                                                              | CPDS 9.9 (2.1), CPP 9.0 (1.8), CO 9.3 (1.8) | CPDS 8.2 (5.3), CPP 6.8 (4.9), CO | Virtual DM educator                                                                                  | <u>Patient education (12 months):</u><br>Mobile DM management software & a web portal provided automated, real-time educational, behavioural & motivational messages. A learning library was available on patient portal.                                                                       | Individual                        | Self-management, treatment targets, action plan                                                                                                                                                                                                                                                                                                                                                                   | NA                                                                                                    | <50% of active patients made or received live phone calls, with an average of 1 phone call/month.                                                                                       |

SUPPLEMENTARY DATA

| Study setting                            | Country       | Study population                                                                                  | Age*                       | Female gender (%) | Socio-economic & education status                                                 | Base-line HbA <sub>1c</sub> <sup>a</sup> | DM duration <sup>a</sup>     | Personnel involved (overall)                                                          | Frequency & duration of patient/personnel training                                                                                                                                                                                                                                                                                    | Patients per group       | Curriculum                                                                                                                                                                                                                                                                                                                                      | Quality assurance                                                                                                                                           | Attendance rates/intensity                                                                                                                                  |
|------------------------------------------|---------------|---------------------------------------------------------------------------------------------------|----------------------------|-------------------|-----------------------------------------------------------------------------------|------------------------------------------|------------------------------|---------------------------------------------------------------------------------------|---------------------------------------------------------------------------------------------------------------------------------------------------------------------------------------------------------------------------------------------------------------------------------------------------------------------------------------|--------------------------|-------------------------------------------------------------------------------------------------------------------------------------------------------------------------------------------------------------------------------------------------------------------------------------------------------------------------------------------------|-------------------------------------------------------------------------------------------------------------------------------------------------------------|-------------------------------------------------------------------------------------------------------------------------------------------------------------|
|                                          |               | non-Hispanic Black)<br>CPDS: 62<br>CPP: 22<br>CO: 23<br>Control: 56                               | Control 53.2 (8.4)         |                   |                                                                                   | Control 9.2 (1.7)                        | 7.7 (5.6), Control 9.0 (7.0) |                                                                                       |                                                                                                                                                                                                                                                                                                                                       |                          |                                                                                                                                                                                                                                                                                                                                                 |                                                                                                                                                             |                                                                                                                                                             |
| <b>Fischer 2011(79)</b>                  |               |                                                                                                   |                            |                   |                                                                                   |                                          |                              |                                                                                       |                                                                                                                                                                                                                                                                                                                                       |                          |                                                                                                                                                                                                                                                                                                                                                 |                                                                                                                                                             |                                                                                                                                                             |
| 8 community health centres               | US            | 5,457 (61.5% Hispanic, 16.9% White, 15.9% African Americans)<br>Active: 2357<br>Control: 3100     | 54.1                       | 59.3              | Low-income                                                                        | NA                                       | NA                           | MA                                                                                    | <u>Patient education (13 months):</u><br>Provision of patient's report card: mailing (quarterly), point-of-care (generated automatically during each PCP visit).<br><br><u>MA training:</u><br>3-h annually by CDE, reinforced during monthly clinic-level collaborative meeting.                                                     | Individual               | <u>Patient modules:</u><br>Brief explanation on DM, hypertension, dyslipidaemia; goal-setting<br><br><u>MA modules:</u><br>Self-management, patient-centered care                                                                                                                                                                               | NA                                                                                                                                                          | NA                                                                                                                                                          |
| <b>Salinero-Fort 2011(80)</b>            |               |                                                                                                   |                            |                   |                                                                                   |                                          |                              |                                                                                       |                                                                                                                                                                                                                                                                                                                                       |                          |                                                                                                                                                                                                                                                                                                                                                 |                                                                                                                                                             |                                                                                                                                                             |
| 8 community health centres               | Madrid, Spain | 600 (Aged >30 years; 22.5% had cardiovascular renal complications)<br>Active: 300<br>Control: 300 | 66.7 (14.5)                | 51.6              | NA                                                                                | 7.05 (1.3) vs 7.36 (1.2)                 | 9.1 (8.3)                    | 30 nurses, 3 scientific researchers                                                   | <u>Patient education (24 months):</u><br>Total 10 visits: monthly x 2 → every 3 monthly. Behavioral sessions lasted about 40-min. Usual sessions were 20-min in length.<br><br><u>Nurse training:</u><br>Not specified                                                                                                                | 1 nurse to 20 patients   | <u>Patient modules:</u><br>SMBG, physical activity, identification of dietary behaviour, health-related behavior modification, medication adherence, smoking cessation<br><br><u>Nurse modules:</u><br>Not specified                                                                                                                            | NA                                                                                                                                                          | NA                                                                                                                                                          |
| <b>RosenbekMinet 2011(81)</b>            |               |                                                                                                   |                            |                   |                                                                                   |                                          |                              |                                                                                       |                                                                                                                                                                                                                                                                                                                                       |                          |                                                                                                                                                                                                                                                                                                                                                 |                                                                                                                                                             |                                                                                                                                                             |
| Academic affiliated DM outpatient clinic | Denmark       | 349 (78.2% T2D; 21.8% T1D)<br>Active: 173<br>Control: 176                                         | 56.4 (12.1)                | 49.6              | <u>Employed/self-employed:</u><br>38.4%<br><br><u>&lt;Middle school:</u><br>69.3% | 7.0 (1.2) for both                       | 4.7 (6.9) vs 4.7 (6.5)       | Physicians, 3 DM specialist nurses, psychologist, two dietitians, one physiotherapist | <u>Patient education (12 months):</u><br>1-year motivational interview program consisting of 5 individual sessions (45-min each) every 3 months.<br><br><u>Personnel training:</u><br>5-day course on motivational interview → 3 practical sessions every 3 months for 18 months. Supervised in 10 real patient scenarios for 1-year. | 8-10 patients each group | <u>Patient modules:</u><br>DM treatment, prevention of complications, SMBG, lifestyle, alcohol use<br><br><u>Personnel modules:</u> mainly motivational interview techniques                                                                                                                                                                    | Audiotaped personnel-patient counselling sessions were reviewed.                                                                                            | <u>Mean number of visits per patient:</u><br>4.6 (average 34-min each)<br>-85% attended ≥5 sessions; 15% had 1-3 sessions                                   |
| <b>Smith 2011(82)</b>                    |               |                                                                                                   |                            |                   |                                                                                   |                                          |                              |                                                                                       |                                                                                                                                                                                                                                                                                                                                       |                          |                                                                                                                                                                                                                                                                                                                                                 |                                                                                                                                                             |                                                                                                                                                             |
| 20 general practices                     | Ireland       | 395 (66.6% had ≥3 medical comorbidities; 94.3% White non-Hispanic)<br>Active: 192<br>Control: 203 | 66.1 (11.1) vs 63.2 (11.0) | 45.8              | <u>Primary education only:</u><br>44.8%                                           | 7.2 (1.4) vs 7.2 (1.2)                   | 7.4 (7.0) vs 6.9 (6.3)       | GP, PN, trained PL with T2D                                                           | <u>Patient education (24 months):</u><br>PL meetings at GP premises at patient's convenience (1-1.5 h in length). Total 9 PL sessions over 2 years (monthly x 2 → every 3 monthly)<br><br><u>PL training:</u><br>Two 90-min evening sessions, given peer supporter manual & resource pack.                                            | 1 PL to 7-8 patients     | <u>Patient modules:</u><br>Basics & complications of DM (sexual, hypo- & hyperglycemia, DR, DN, sleep problems), CV risk factors, SMBG, sick days' rules, healthy eating plate, exercise, foot care, medications, insulin & injection sites<br><br><u>PL modules:</u><br>Basics & complications of DM, lifestyle & medication issues, role-play | a. PL's log diaries.<br>b. Recorded PL meetings.<br>c. Project managers contacted every PL after each group meeting.<br>d. Focus groups with professionals, | <u>Mean number of attended peer support meetings:</u><br>5.0<br>-18% never attended<br><br><u>Mean number of study team-PL contacts:</u><br>25 over 2 years |

SUPPLEMENTARY DATA

| Study setting                | Country          | Study population                                                                                     | Age*                                                     | Female gender (%) | Socio-economic & education status                         | Base-line HbA <sub>1c</sub> <sup>a</sup>             | DM duration <sup>a</sup>                             | Personnel involved (overall)               | Frequency & duration of patient/personnel training                                                                                                                         | Patients per group                | Curriculum                                                                                                                                                       | Quality assurance | Attendance rates/intensity                                                                                                    |
|------------------------------|------------------|------------------------------------------------------------------------------------------------------|----------------------------------------------------------|-------------------|-----------------------------------------------------------|------------------------------------------------------|------------------------------------------------------|--------------------------------------------|----------------------------------------------------------------------------------------------------------------------------------------------------------------------------|-----------------------------------|------------------------------------------------------------------------------------------------------------------------------------------------------------------|-------------------|-------------------------------------------------------------------------------------------------------------------------------|
|                              |                  |                                                                                                      |                                                          |                   |                                                           |                                                      |                                                      |                                            | GP & PN training:<br>1.5-h practice-based educational session by a GP. 3 training sessions to PN.                                                                          |                                   | GP & PN modules:<br>T2D treatment in primary care                                                                                                                | PL & patients.    |                                                                                                                               |
| <b>Huang 2010(83)</b>        |                  |                                                                                                      |                                                          |                   |                                                           |                                                      |                                                      |                                            |                                                                                                                                                                            |                                   |                                                                                                                                                                  |                   |                                                                                                                               |
| Primary care clinics         | Taiwan           | 193 (HbA <sub>1c</sub> ≥7.0%)<br>Active: 75<br>Control: 79                                           | 56.6 (8.0) vs 56.9 (7.5)                                 | 56.5              | <6 years' education:<br>67.5%                             | 8.0 (1.5) vs 8.4 (1.8)                               | 4.8 (4.4) vs 4.8 (4.5)                               | Dietitians                                 | Patient education (12 months):<br>GE: not specified<br>IE: every 3 months, 30-60-mins in length. Patients could call dietician's mobile for dietary advice, and vice versa | Individual, group (not specified) | Patient modules:<br>GE: SMBG, medications, exercise, foot care, complication management<br>IE: individualized nutrition counselling & dietary plan, portion size | NA                | NA                                                                                                                            |
|                              |                  |                                                                                                      |                                                          |                   |                                                           |                                                      |                                                      |                                            | Dietitian training:<br>Additional clinical training in the Department of Endocrinology & Department of Nutrition of research centres.                                      |                                   | Dietitian modules:<br>Not specified                                                                                                                              |                   |                                                                                                                               |
| <b>Trento 2010(84)</b>       |                  |                                                                                                      |                                                          |                   |                                                           |                                                      |                                                      |                                            |                                                                                                                                                                            |                                   |                                                                                                                                                                  |                   |                                                                                                                               |
| 13 hospital-based DM clinics | Italy            | 815 (non-insulin-treated T2D)<br>Active: 421<br>Control: 394                                         | 69.0 (8.4) vs 69.6 (8.4)                                 | 49.3              | Retired:<br>50.7%<br><br><High school education:<br>83.7% | 7.75 (1.57) vs 7.81 (1.43)                           | 15.7 (6.9) vs 16.6 (7.2)                             | Physicians, nurses, dietitians, pedagogist | Patient education (24 months):<br>Seven 1-h interactive group sessions (every 3 months) & annual individual consultations                                                  | Individual, group (9-10 patients) | Lifestyle, hypoglycemia, DM complications, laboratory results, problem solving                                                                                   | NA                | NA                                                                                                                            |
| <b>Piatt 2011(85)</b>        |                  |                                                                                                      |                                                          |                   |                                                           |                                                      |                                                      |                                            |                                                                                                                                                                            |                                   |                                                                                                                                                                  |                   |                                                                                                                               |
| 11 primary care practices    | Pennsylvania, US | 119 (underserved; 91.6% White; 55.5% ≥2 DM complications)<br>CCM: 30<br>PROV: 38<br>Control: 51      | CCM 69.7 (10.7) vs PROV 64.4 (8.9) vs Control 68.6 (8.6) | 49.6              | Low socio-economic status:<br>79.8%                       | CCM 7.6 (1.5) vs PROV 7.3 (1.6) vs Control 6.9 (1.3) | CCM 10.3 (8.4), PROV 11.5 (9.0), Control 13.1 (10.9) | CDE, PCP                                   | Patient education (12 months):<br>CCM: 6 weekly DSME sessions → monthly support group. Presence of CDE for 6 months                                                        | Group (not specified)             | Patient modules:<br>DM self-management, lifestyle, problem solving                                                                                               | NA                | >75% of patients attended at least ¾ of 6 DSME classes.<br><br>About 50% of patients attended at least 2/3 of support groups. |
|                              |                  |                                                                                                      |                                                          |                   | Annual household income <US\$ 20,000:<br>42.9%            |                                                      |                                                      |                                            | PCP education (PROV):<br>1 PBL session                                                                                                                                     |                                   | PCP modules:<br>Not specified                                                                                                                                    |                   |                                                                                                                               |
| <b>Piatt 2006(86)</b>        |                  |                                                                                                      |                                                          |                   |                                                           |                                                      |                                                      |                                            |                                                                                                                                                                            |                                   |                                                                                                                                                                  |                   |                                                                                                                               |
| 11 primary care practices    | Pennsylvania, US | 119 (under-served; 91.6% White; 55.5% had ≥2 DM complications)<br>CCM: 30<br>PROV: 38<br>Control: 51 | CCM 69.7 (10.7) vs PROV 64.4 (8.9) vs Control 68.6 (8.6) | 49.6              | Low socio-economic status:<br>79.8%                       | CCM 7.6 (1.5) vs PROV 7.3 (1.6) vs Control 6.9 (1.3) | CCM 10.3 (8.4), PROV 11.5 (9.0), Control 13.1 (10.9) | CDE, PCP                                   | As above                                                                                                                                                                   | As above                          | As above                                                                                                                                                         | NA                | As above                                                                                                                      |

SUPPLEMENTARY DATA

| Study setting                    | Country                  | Study population                                                                                               | Age*                       | Female gender (%) | Socio-economic & education status        | Base-line HbA <sub>1c</sub> <sup>a</sup> | DM duration <sup>a</sup> | Personnel involved (overall)                     | Frequency & duration of patient/personnel training                                                                                                                                                                         | Patients per group | Curriculum                                                                                                                                                                                                                                                | Quality assurance                                                                                | Attendance rates/intensity                                               |
|----------------------------------|--------------------------|----------------------------------------------------------------------------------------------------------------|----------------------------|-------------------|------------------------------------------|------------------------------------------|--------------------------|--------------------------------------------------|----------------------------------------------------------------------------------------------------------------------------------------------------------------------------------------------------------------------------|--------------------|-----------------------------------------------------------------------------------------------------------------------------------------------------------------------------------------------------------------------------------------------------------|--------------------------------------------------------------------------------------------------|--------------------------------------------------------------------------|
|                                  |                          |                                                                                                                |                            |                   | <high school education: 57.1%            |                                          |                          |                                                  |                                                                                                                                                                                                                            |                    |                                                                                                                                                                                                                                                           |                                                                                                  |                                                                          |
| <b>Barceló 2010(87)</b>          |                          |                                                                                                                |                            |                   |                                          |                                          |                          |                                                  |                                                                                                                                                                                                                            |                    |                                                                                                                                                                                                                                                           |                                                                                                  |                                                                          |
| 10 public health centres         | Xalapa& Veracruz, Mexico | 307 (98.0% T2D) Active: 196 Control: 111                                                                       | Aged ≥40 years: 94.5%      | NA                | Low socioeconomic status                 | Mean 8.4 vs 8.7 (no SD)                  | NA                       | MDT (physician, nurses, dietitian, psychologist) | Patient education (18 months):<br>Joined sessions with MDT or peers.<br><br>Personnel training:<br>3 sessions                                                                                                              | NA                 | 4 patient modules – PEDNID LA model:<br>Dietary information & management, foot care & regular exercise, DM care, sick days' rules.<br><br>Personnel modules:<br>Structured patient DM education, foot care training, in-service training on DM management | Real-time adjustments based on the qualitative assessment of the peer support group by patients. | 81.1% & 32.4% of intervention & control groups joined the support group. |
| <b>Cleveringa 2010(88)</b>       |                          |                                                                                                                |                            |                   |                                          |                                          |                          |                                                  |                                                                                                                                                                                                                            |                    |                                                                                                                                                                                                                                                           |                                                                                                  |                                                                          |
| 55 primary care practices        | The Netherlands          | 3391 (55.2% had CVD; 97.7% Caucasians) Active: 1699 Control: 1692                                              | 65.2 (11.3) vs 65.0 (11.0) | 51.0              | NA                                       | 7.1 (1.3) vs 7.0 (1.1)                   | 5.8 (5.7) vs 5.4 (5.8)   | PN                                               | Patient education (12 months):<br>PN-led DM consultation hour every 3 months.<br><br>PN training:<br>Not specified                                                                                                         | NA                 | Not specified<br><br>PN modules:<br>DM care                                                                                                                                                                                                               | NA                                                                                               | NA                                                                       |
| <b>Cleveringa 2008(89)</b>       |                          |                                                                                                                |                            |                   |                                          |                                          |                          |                                                  |                                                                                                                                                                                                                            |                    |                                                                                                                                                                                                                                                           |                                                                                                  |                                                                          |
| 55 primary care practices        | The Netherlands          | 3391 (55.2% had CVD; 97.7% Caucasians) Active: 1699 Control: 1692                                              | 65.2 (11.3) vs 65.0 (11.0) | 51.0              | NA                                       | 7.1 (1.3) vs 7.0 (1.1)                   | 5.8 (5.7) vs 5.4 (5.8)   | PN                                               | As above                                                                                                                                                                                                                   | NA                 | As above                                                                                                                                                                                                                                                  | NA                                                                                               | NA                                                                       |
| <b>Cleveringa 2010(90)</b>       |                          |                                                                                                                |                            |                   |                                          |                                          |                          |                                                  |                                                                                                                                                                                                                            |                    |                                                                                                                                                                                                                                                           |                                                                                                  |                                                                          |
| 55 primary care practices        | The Netherlands          | 3,391 (55.2% had CVD; 97.7% Caucasians) Active: 1699 Control: 1692                                             | 65.2 (11.3) vs 65.0 (11.0) | 51.0              | NA                                       | 7.1 (1.3) vs 7.0 (1.1)                   | 5.8 (5.7) vs 5.4 (5.8)   | PN                                               | As above                                                                                                                                                                                                                   | NA                 | As above                                                                                                                                                                                                                                                  | NA                                                                                               | NA                                                                       |
| <b>Davis 2010(91)</b>            |                          |                                                                                                                |                            |                   |                                          |                                          |                          |                                                  |                                                                                                                                                                                                                            |                    |                                                                                                                                                                                                                                                           |                                                                                                  |                                                                          |
| 3 rural community health centres | South Carolina, US       | 165 (HbA <sub>1c</sub> >7%; 73.9% African Americans or other, 26.1% non-Hispanic White) Active: 85 Control: 80 | 59.9 (9.4) vs 59.2 (9.3)   | 74.6              | Medicaid: 41%<br><br><high school: 41.2% | 9.4 (0.3) vs 8.8 (0.3)                   | 8.5 (6.6) vs 10.3 (8.1)  | CDE, dietitian, PN at primary care               | Patient education (12 months):<br>13 DSME sessions (3 individual, 10 group); 2 sessions during 1 <sup>st</sup> month, 3 groups were in-person, others were by videoconference. Additional phone counselling when required. | NA                 | Patient modules:<br>Self-management (goal-setting, exercise, foot care, diet, stress management, social support)                                                                                                                                          | NA                                                                                               | NA                                                                       |
| <b>Jameson 2010(92)</b>          |                          |                                                                                                                |                            |                   |                                          |                                          |                          |                                                  |                                                                                                                                                                                                                            |                    |                                                                                                                                                                                                                                                           |                                                                                                  |                                                                          |
| 13 primary care                  | US                       | 103 (HbA <sub>1c</sub> ≥9%; 63.1%)                                                                             | 49.3 (10.8) vs 49.7        | 51.5              | 63.1% privately insured                  | 10.4 (1.2) vs 11.1                       | NA                       | Pharmacist                                       | Patient education (12 months):<br>Individual meetings at pharmacy & telephone follow up                                                                                                                                    | Individual         | Patient modules:<br>Self-management (lifestyle, SMBG, medication, insulin)                                                                                                                                                                                | NA                                                                                               | Mean number of office visits per patient:                                |

SUPPLEMENTARY DATA

| Study setting                     | Country                       | Study population                                                                                                         | Age*                      | Female gender (%) | Socio-economic & education status | Base-line HbA <sub>1c</sub> <sup>a</sup> | DM duration <sup>a</sup> | Personnel involved (overall)                                                                   | Frequency & duration of patient/personnel training                                                                                                                                                                                                                                                                                                                                                                       | Patients per group                | Curriculum                                                                                                                                                                                                                                        | Quality assurance                                 | Attendance rates/intensity                                                                                                               |
|-----------------------------------|-------------------------------|--------------------------------------------------------------------------------------------------------------------------|---------------------------|-------------------|-----------------------------------|------------------------------------------|--------------------------|------------------------------------------------------------------------------------------------|--------------------------------------------------------------------------------------------------------------------------------------------------------------------------------------------------------------------------------------------------------------------------------------------------------------------------------------------------------------------------------------------------------------------------|-----------------------------------|---------------------------------------------------------------------------------------------------------------------------------------------------------------------------------------------------------------------------------------------------|---------------------------------------------------|------------------------------------------------------------------------------------------------------------------------------------------|
| practices                         |                               | White)<br>Active: 52<br>Control: 51                                                                                      | (10.9)                    |                   |                                   | (1.6)                                    |                          |                                                                                                | <u>Pharmacist training:</u><br>Board-certified pharmacotherapy specialist.                                                                                                                                                                                                                                                                                                                                               |                                   | <u>Pharmacist modules:</u><br>Joined the American Society of Health-System Pharmacists DM management traineeship, an ADA postgraduate course in DM management & an AADE training program.                                                         |                                                   | 6 (30-60-min duration)<br><br><u>Mean number of phone calls per patient:</u><br>3 (10-20-min duration)                                   |
| <b>Edelman 2010(93)</b>           |                               |                                                                                                                          |                           |                   |                                   |                                          |                          |                                                                                                |                                                                                                                                                                                                                                                                                                                                                                                                                          |                                   |                                                                                                                                                                                                                                                   |                                                   |                                                                                                                                          |
| 2 veteran affairs medical centres | North Carolina & Virginia, US | 239 (HbA <sub>1c</sub> ≥7.5% & SBP >140 or DBP >90; 59.0% African Americans, 36.4% White)<br>Active: 133<br>Control: 106 | 63.0 (9.4) vs 60.8 (10.0) | 4.2               | ≤High school education: 40.2%     | 9.2 (1.3) vs 9.2 (1.5)                   | NA                       | MDT (primary care general internist, pharmacist, nurse or other CDE)                           | <u>Patient education (12 months):</u><br>Interactive 90-120-min sessions with same care team every 2 months (total 7 visits), followed by one-on-one breakout session with either internist or pharmacist                                                                                                                                                                                                                | 7-9 patients each group           | <u>Patient modules:</u><br>Selected by patients: foot care, mechanism of medications, signs & symptoms of hyper- & Hypoglycemia, diet, sick days, SMBG, exercise                                                                                  | Frequent calls & consultations between 2 centres. | NA                                                                                                                                       |
| <b>Goderis 2010(94)</b>           |                               |                                                                                                                          |                           |                   |                                   |                                          |                          |                                                                                                |                                                                                                                                                                                                                                                                                                                                                                                                                          |                                   |                                                                                                                                                                                                                                                   |                                                   |                                                                                                                                          |
| 90 primary care practices         | Belgium                       | 2495 (Western European; 39.2% on antiplatelet, 39.9% on statin)<br>Active (AQIP): 1577<br>Control (UQIP): 918            | 68.0 (12.0) for both      | 52.1              | NA                                | 7.1 (1.3) vs 7.2 (1.3)                   | 7.2 (6.9) vs 7.2 (7.3)   | GP, MDT (general internist with interest in DM, CDE, dietician, psychologist, ophthalmologist) | <u>Patient education (23 months):</u><br>Open to all patient groups. Home visit by CDE was available to intervention group. Provision of printed educational materials.<br><br><u>GP training:</u><br><u>UQIP:</u> 2 postgraduate educational sessions. Case-coaching by endocrinologist by phone/mail.<br><br><u>AQIP:</u> as above & 2 extra educational sessions, joint case discussion with MDT and endocrinologist. | Individual, group (not specified) | <u>Patient education:</u><br>Disease insight, diet, exercise, medications adherence, insulin management, motivational interview.<br><br><u>GP modules:</u><br>Detailed coaching on DM guidelines, principles of insulin treatment in primary care | NA                                                | <u>Mean number of patient contacts/week:</u><br>97 vs 92<br><br><u>Physician attendance to common educational meetings:</u><br>76 vs 70% |
| <b>Borgermans 2009(95)</b>        |                               |                                                                                                                          |                           |                   |                                   |                                          |                          |                                                                                                |                                                                                                                                                                                                                                                                                                                                                                                                                          |                                   |                                                                                                                                                                                                                                                   |                                                   |                                                                                                                                          |
| 90 primary care practices         | Belgium                       | 2495 (Western European; 39.2% on antiplatelet, 39.9% on statin)<br>Active (AQIP): 1577<br>Control (UQIP): 918            | 68.0 (12.0) for both      | 52.1              | NA                                | 7.1 (1.3) vs 7.2 (1.3)                   | 7.2 (6.9) vs 7.2 (7.3)   | GP, MDT (general internist with interest in DM, CDE, dietician, psychologist, ophthalmologist) | As above                                                                                                                                                                                                                                                                                                                                                                                                                 | As above                          | As above                                                                                                                                                                                                                                          | NA                                                | PCP referral to MDT service: 91 vs 75%                                                                                                   |
| <b>Chan 2009(96)</b>              |                               |                                                                                                                          |                           |                   |                                   |                                          |                          |                                                                                                |                                                                                                                                                                                                                                                                                                                                                                                                                          |                                   |                                                                                                                                                                                                                                                   |                                                   |                                                                                                                                          |
| 9 public hospitals                | Hong Kong                     | 205 (Chinese T2D with plasma creatinine 150-350)                                                                         | 65.0 (7.2)                | 33.2              | NA                                | 8.2 (1.9) vs 8.4 (0.2)                   | 14.0 (7.9)               | DM team (diabetologists, endocrine trainees, DM specialist nurses,                             | <u>Patient education (24 months):</u><br>Doctor-patient visits every 3 months or more often if indicated. Reinforcement using phone calls by nurses.                                                                                                                                                                                                                                                                     | NA                                | Low-protein/potassium diet, drug/insulin use, SMBG                                                                                                                                                                                                | NA                                                | NA                                                                                                                                       |

SUPPLEMENTARY DATA

| Study setting                                                | Country       | Study population                                                                                                           | Age*                     | Female gender (%) | Socio-economic & education status                                                                                    | Base-line HbA <sub>1c</sub> <sup>a</sup> | DM duration <sup>a</sup>              | Personnel involved (overall)                                                  | Frequency & duration of patient/personnel training                                                                                                                                                                                                                               | Patients per group                | Curriculum                                                                                                                                                                                                                                                    | Quality assurance                                                                                                                                                                                         | Attendance rates/intensity               |
|--------------------------------------------------------------|---------------|----------------------------------------------------------------------------------------------------------------------------|--------------------------|-------------------|----------------------------------------------------------------------------------------------------------------------|------------------------------------------|---------------------------------------|-------------------------------------------------------------------------------|----------------------------------------------------------------------------------------------------------------------------------------------------------------------------------------------------------------------------------------------------------------------------------|-----------------------------------|---------------------------------------------------------------------------------------------------------------------------------------------------------------------------------------------------------------------------------------------------------------|-----------------------------------------------------------------------------------------------------------------------------------------------------------------------------------------------------------|------------------------------------------|
|                                                              |               | umol/L<br>Active: 104<br>Control: 101                                                                                      |                          |                   |                                                                                                                      |                                          |                                       | dietitian)                                                                    |                                                                                                                                                                                                                                                                                  |                                   |                                                                                                                                                                                                                                                               |                                                                                                                                                                                                           |                                          |
| <b>Ko 2011(97)</b>                                           |               |                                                                                                                            |                          |                   |                                                                                                                      |                                          |                                       |                                                                               |                                                                                                                                                                                                                                                                                  |                                   |                                                                                                                                                                                                                                                               |                                                                                                                                                                                                           |                                          |
| 9 public hospitals                                           | Hong Kong     | 205 (Chinese T2D with plasma creatinine 150-350 umol/L)<br>Active: 104<br>Control: 101                                     | 65.0 (7.2)               | 33.2              | NA                                                                                                                   | 8.2 (1.9) vs 8.4 (0.2)                   | 14.0 (7.9)                            | DM team (diabetologists, endocrine trainees, DM specialist nurses, dietitian) | As above                                                                                                                                                                                                                                                                         | NA                                | As above                                                                                                                                                                                                                                                      | NA                                                                                                                                                                                                        | NA                                       |
| <b>Shea 2009(98)</b>                                         |               |                                                                                                                            |                          |                   |                                                                                                                      |                                          |                                       |                                                                               |                                                                                                                                                                                                                                                                                  |                                   |                                                                                                                                                                                                                                                               |                                                                                                                                                                                                           |                                          |
| Urban & rural primary care practices                         | New York, US  | 1665 (underserved T2D aged ≥55 years; 49.4% White, 35.2% Hispanic, 14.9% African Americans)<br>Active: 844<br>Control: 821 | 70.8 (6.5) vs 70.9 (6.8) | 62.8              | ≤12 years of education: 83.1%                                                                                        | 7.36 (1.48) vs 7.40 (1.60)               | 11.2 (9.6) vs 10.99 (9.2)             | 4 NCM, dietitians                                                             | <u>Patient education (12 months):</u><br>Bilingual educational webpage (regular & low literacy versions), videoconferencing.                                                                                                                                                     | Individual, group (not specified) | Not specified                                                                                                                                                                                                                                                 | Daily supervision of NCM by an endocrinologist<br><br>Use of home telemedicine unit was logged (contacts with NCM, the project Web page/chat room, frequency of patient's views on own clinical database) | NA                                       |
| <b>Shea 2006(99)</b>                                         |               |                                                                                                                            |                          |                   |                                                                                                                      |                                          |                                       |                                                                               |                                                                                                                                                                                                                                                                                  |                                   |                                                                                                                                                                                                                                                               |                                                                                                                                                                                                           |                                          |
| Urban & rural primary care practices                         | New York, US  | 1665 (underserved T2D aged ≥55 years; 49.4% White, 35.2% Hispanic, 14.9% African Americans)<br>Active: 844<br>Control: 821 | 70.8 (6.6)               | 62.8              | ≤12 years of education: 83.1%                                                                                        | 7.36 (1.48) vs 7.40 (1.60)               | ≤10 years: 420 (49.8%) vs 410 (50.0%) | 4 NCM, dieticians                                                             | As above                                                                                                                                                                                                                                                                         | Individual, group (not specified) | Not specified                                                                                                                                                                                                                                                 | As above                                                                                                                                                                                                  | NA                                       |
| <b>Gary 2009(100)</b>                                        |               |                                                                                                                            |                          |                   |                                                                                                                      |                                          |                                       |                                                                               |                                                                                                                                                                                                                                                                                  |                                   |                                                                                                                                                                                                                                                               |                                                                                                                                                                                                           |                                          |
| A community, university affiliated managed care organization | Baltimore, US | 542 (Urban African Americans)<br>Active: 269<br>Control: 273                                                               | 58.0 (11.0)              | 73.0              | <u>Living in poverty:</u> 50.0%<br><br><u>Retired or disabled:</u> 58.0%<br><br><u>Mean years of education:</u> 11.0 | 7.8 (2.2)                                | NA                                    | CDE (RN), trained CHW                                                         | <u>Patient education (24 months):</u><br><u>Nurse/CHW team:</u><br>6-week training initially. At least 3 home visits/year by CHW. Annual session with nurse.<br><br><u>Telephone group:</u><br>Received DM-specific information in mail. Phone calls from nurses every 6 months. | Individual                        | <u>Nurse/CHW team – PRECEDE PROCEED model:</u><br>CV risk factors, lifestyle, foot care, barriers to optimal DM care & self-management (depression, socioeconomic problems, caregiver concerns)<br><br><u>Telephone group:</u><br>Preventive health screening | CHWs were supervised by nurses & maintained daily contact. Weekly case conferences to discuss on problematic patients.                                                                                    | 92% of patient completed 24-month visit. |
| <b>Gary 2003(101)</b>                                        |               |                                                                                                                            |                          |                   |                                                                                                                      |                                          |                                       |                                                                               |                                                                                                                                                                                                                                                                                  |                                   |                                                                                                                                                                                                                                                               |                                                                                                                                                                                                           |                                          |



SUPPLEMENTARY DATA

| Study setting                                                | Country                 | Study population                                                                                                                                | Age*                                                            | Female gender (%) | Socio-economic & education status                                                                        | Base-line HbA <sub>1c</sub> <sup>a</sup>                       | DM duration <sup>a</sup>                                       | Personnel involved (overall)   | Frequency & duration of patient/personnel training                                                                                                                                                                                                                                                                                                  | Patients per group | Curriculum                                                                                                                                   | Quality assurance                                                                              | Attendance rates/intensity                                                                                                                                                        |
|--------------------------------------------------------------|-------------------------|-------------------------------------------------------------------------------------------------------------------------------------------------|-----------------------------------------------------------------|-------------------|----------------------------------------------------------------------------------------------------------|----------------------------------------------------------------|----------------------------------------------------------------|--------------------------------|-----------------------------------------------------------------------------------------------------------------------------------------------------------------------------------------------------------------------------------------------------------------------------------------------------------------------------------------------------|--------------------|----------------------------------------------------------------------------------------------------------------------------------------------|------------------------------------------------------------------------------------------------|-----------------------------------------------------------------------------------------------------------------------------------------------------------------------------------|
| A community, university affiliated managed care organization | Baltimore, US           | 186 (urban African Americans) NCM: 38 CHW: 41 Combined: 36 Control: 34                                                                          | 59.0 (9.0)                                                      | 77.0              | <u>Annual household income &lt;US\$ 7,500</u> : 50.0%<br><br><u>Mean years of education</u> : 10.0 (3.0) | 8.6 (2.0)                                                      | 9.0 (8.0)                                                      | CDE (RN), trained CHW          | <u>Patient education (24 months)</u> :<br><u>NCM intervention</u> : 45-min face-to-face visits 3x/year and/or telephone contacts.<br><br><u>CHW intervention</u> : 45-60-min face-to-face home visits 3x/year and/or telephone contacts.<br><br><u>Combined intervention</u> : Total 6 visits/year & biweekly meetings to coordinate interventions. | Individual         | <u>Modules for all groups</u> : Lifestyle, foot care, eye care, SMBG, smoking cessation, adherence to medications, appointments & referrals. | Documentation of visits & phone calls. Initial weekly troubleshoot meetings with research team | <u>At least 3 visits</u> : NCM 25%, CHW 62%<br><br><u>At least 7 visits</u> : NCM <5%, CHW <20%<br><br>≈50% of all patients had at least 1 phone contact.                         |
| <b>Rodríguez-Idígoras 2009(102)</b>                          |                         |                                                                                                                                                 |                                                                 |                   |                                                                                                          |                                                                |                                                                |                                |                                                                                                                                                                                                                                                                                                                                                     |                    |                                                                                                                                              |                                                                                                |                                                                                                                                                                                   |
| 35 primary care practices                                    | Malaga, Spain           | 328 (78.4% with BMI >27 kg/m <sup>2</sup> ; 43.3% had sedentary lifestyle) Active: 161 Control: 167                                             | Mean (95% CI): 63.32 (61.60 to 65.04) vs 64.52 (62.96 to 66.09) | 48.5              | NA                                                                                                       | Mean (95% CI): 7.62 (7.38 to 7.88) vs 7.41 (7.21 to 7.61)      | Mean (95% CI): 11.32 (10.16 to 12.50) vs 10.18 (9.11 to 11.25) | Physician, DM specialist nurse | <u>Patient education (12 months)</u> : Not specified                                                                                                                                                                                                                                                                                                | NA                 | SMBG training & interpretation                                                                                                               | Recorded interventions.                                                                        | <u>Mean number of phone calls per month</u> : Patients to centre: 3.0; Centre to patients: 2.62<br><br>62% of patients sent SMBG records at least 8 months over the study period. |
| <b>Al Mazroui 2009(103)</b>                                  |                         |                                                                                                                                                 |                                                                 |                   |                                                                                                          |                                                                |                                                                |                                |                                                                                                                                                                                                                                                                                                                                                     |                    |                                                                                                                                              |                                                                                                |                                                                                                                                                                                   |
| A military hospital out-patient clinic                       | United Arab of Emirates | 240 (OAD-treated T2D with suboptimal control) Active: 120 Control: 120                                                                          | 48.7 (8.2) vs 49.9 (8.3)                                        | 30.8              | NA                                                                                                       | Geo-metric mean (95% CI): 8.5 (8.3 to 8.7) vs 8.4 (8.2 to 8.6) | 6.1 (2.9) vs 6.2 (2.7)                                         | Pharmacist                     | <u>Patient education (12 months)</u> : Provision of printed leaflets. Monthly reinforcement during medications collection at pharmacy.                                                                                                                                                                                                              | Individual         | DM complications, dosage, side effects/storage of medications, lifestyle, self-management, smoking cessation                                 | NA                                                                                             | NA                                                                                                                                                                                |
| <b>O'Connor 2009(104)</b>                                    |                         |                                                                                                                                                 |                                                                 |                   |                                                                                                          |                                                                |                                                                |                                |                                                                                                                                                                                                                                                                                                                                                     |                    |                                                                                                                                              |                                                                                                |                                                                                                                                                                                   |
| 57 PCPs in a medical group                                   | US                      | 2020 (60.2% had hypertension; 14% with CHD, 7.5% had depression) Case-based learning + feedback: 604 Case-based learning only: 725 Control: 691 | 64.0 (13.0)                                                     | 42.0              | NA                                                                                                       | Median 7.2 (no IQR)                                            | NA                                                             | PCP                            | Mainly practice & HCP levels of intervention                                                                                                                                                                                                                                                                                                        | NA                 | NA                                                                                                                                           | NA                                                                                             | NA                                                                                                                                                                                |
| <b>Samuel-Hodge 2009(105)</b>                                |                         |                                                                                                                                                 |                                                                 |                   |                                                                                                          |                                                                |                                                                |                                |                                                                                                                                                                                                                                                                                                                                                     |                    |                                                                                                                                              |                                                                                                |                                                                                                                                                                                   |

SUPPLEMENTARY DATA

| Study setting                                                   | Country            | Study population                                                                                              | Age*                                | Female gender (%) | Socio-economic & education status                                           | Base-line HbA <sub>1c</sub> <sup>a</sup> | DM duration <sup>a</sup>          | Personnel involved (overall)          | Frequency & duration of patient/personnel training                                                                                                                                                                                                                                                                                                                                                              | Patients per group                | Curriculum                                                                                                                                                                                                                                     | Quality assurance                                                        | Attendance rates/intensity                                                                                                                                                                                       |
|-----------------------------------------------------------------|--------------------|---------------------------------------------------------------------------------------------------------------|-------------------------------------|-------------------|-----------------------------------------------------------------------------|------------------------------------------|-----------------------------------|---------------------------------------|-----------------------------------------------------------------------------------------------------------------------------------------------------------------------------------------------------------------------------------------------------------------------------------------------------------------------------------------------------------------------------------------------------------------|-----------------------------------|------------------------------------------------------------------------------------------------------------------------------------------------------------------------------------------------------------------------------------------------|--------------------------------------------------------------------------|------------------------------------------------------------------------------------------------------------------------------------------------------------------------------------------------------------------|
| 24 churches                                                     | North Carolina, US | 201 (African Americans; 18.9% had CHD) Active: 117 Control: 84                                                | Mean (SE): 57.0 (0.9) vs 61.3 (1.3) | 63.7              | Mean years of education: 12.6 (0.4) vs 12.2 (0.5)                           | Mean (SE): 7.7 (0.2) vs 7.9 (0.3)        | Mean (SE): 8.8 (0.8) vs 9.2 (0.9) | Dietician, trained PL                 | <u>Patient education (12 months):</u><br><u>8-month intensive phase:</u><br><u>IE:</u> one 60-min counselling.<br><u>GE:</u> 12 biweekly 90-120 min group sessions. 1 <sup>st</sup> 7 GE were led by a registered dietician.<br>Also, monthly phone contacts & 3 encouragement postcards.<br><br><u>4-month reinforcement phase:</u> monthly phone contacts<br><br><u>PL training:</u><br>4 weekly 4-h sessions | Individual, group (not specified) | <u>Patient modules:</u><br>diet, physical activity, self-management behaviors, hands-on activities<br><br><u>PL modules:</u><br>Motivational interview, DM self-management                                                                     | NA                                                                       | 97% completed IE<br>51% attended all GE sessions (mean 6 sessions per patient).<br><br>62% completed scheduled calls (only 1.5 calls per patient)<br>-37% of scheduled calls occurred during the final 4 months. |
| <b>Weitzman 2009(106)</b>                                       |                    |                                                                                                               |                                     |                   |                                                                             |                                          |                                   |                                       |                                                                                                                                                                                                                                                                                                                                                                                                                 |                                   |                                                                                                                                                                                                                                                |                                                                          |                                                                                                                                                                                                                  |
| 4 primary care clinics                                          | Israel             | 417 (aged >30 years) Active: 242 Control: 175                                                                 | 63.1 vs 65.8                        | 52.3              | Mean years of education: 11.0 vs 9.1                                        | 8.1 for both                             | 8.4 vs 9.5                        | Internist, family medicine specialist | Mainly HCP& patient levels of intervention                                                                                                                                                                                                                                                                                                                                                                      | NA                                | NA                                                                                                                                                                                                                                             | NA                                                                       | NA                                                                                                                                                                                                               |
| <b>Anderson 2009(107)</b>                                       |                    |                                                                                                               |                                     |                   |                                                                             |                                          |                                   |                                       |                                                                                                                                                                                                                                                                                                                                                                                                                 |                                   |                                                                                                                                                                                                                                                |                                                                          |                                                                                                                                                                                                                  |
| Primary care                                                    | Michigan, US       | 310 (45.2% African Americans) Active: 156 Control: 154                                                        | 55.5 (11.3) vs 55.7 (11.5)          | 58.7              | <high school education: 10.3%                                               | 7.7 (2.1) vs 7.5 (1.8)                   | 8.6 (8.1) vs 8.0 (7.8)            | CDE (nurse, dietician)                | <u>Patient education (24 months):</u><br>One-to-one meeting after enrolment, followed by meeting among CDE, physician & patient. Monthly phone calls from CDE.<br><br><u>CDE training:</u><br>>10 years' experience using empowerment approach                                                                                                                                                                  | Individual                        | <u>Patient modules:</u><br>Self-management plan, behavioral change<br><br><u>CDE modules:</u><br>Not specified                                                                                                                                 | NA                                                                       | NA                                                                                                                                                                                                               |
| <b>Powers 2009(108)</b>                                         |                    |                                                                                                               |                                     |                   |                                                                             |                                          |                                   |                                       |                                                                                                                                                                                                                                                                                                                                                                                                                 |                                   |                                                                                                                                                                                                                                                |                                                                          |                                                                                                                                                                                                                  |
| 3 primary care clinics of Durham Veteran Affairs Medical Centre | US                 | 216 (T2D with hypertension; 55.6% White, 42.6% African Americans) Active: 102 Control: 114                    | 63.8 (10.8) vs 64.3 (10.8)          | 1.4               | <u>Employed:</u><br>19.0%<br><br><u>&lt;high school education:</u><br>54.6% | 7.54 (0.15) vs 7.20 (0.15)               | NA                                | RN                                    | <u>Patient education (24 months):</u><br>Total 12 calls (every 2-monthly). No face-to-face meetings.                                                                                                                                                                                                                                                                                                            | Individual                        | <u>9 patient modules:</u><br>Basics of hypertension, memory, social support, patient-doctor communication, medication & appointment adherence, lifestyle (diet, exercise, smoking, alcohol use), health literacy aids, medication side effects | Used scripted information and tailored algorithm generated from database | <u>Mean number of calls each patient:</u><br>11 (average 5-min)                                                                                                                                                  |
| <b>O'Connor 2009(109)</b>                                       |                    |                                                                                                               |                                     |                   |                                                                             |                                          |                                   |                                       |                                                                                                                                                                                                                                                                                                                                                                                                                 |                                   |                                                                                                                                                                                                                                                |                                                                          |                                                                                                                                                                                                                  |
| Multi-specialty medical group (123 PCPs)                        | US                 | 3703 (11.1% had CHD in preceding 12 months) Combined: 946 Physician only: 1041 Patient only: 869 Control: 847 | 56.1 (12.1)                         | 46.1              | NA                                                                          | 7.53 (1.60)                              | NA                                | PCP                                   | <u>Patient education (12 months):</u><br>Every 4-monthly mailing of 4-page brochures                                                                                                                                                                                                                                                                                                                            | Individual                        | <u>Patient modules:</u><br>A graph on personal trend of biochemical tests, treatment targets, customized checklists to facilitate patient-PCP communication, behavioural change                                                                | NA                                                                       | NA                                                                                                                                                                                                               |
| <b>Ma 2009(110)</b>                                             |                    |                                                                                                               |                                     |                   |                                                                             |                                          |                                   |                                       |                                                                                                                                                                                                                                                                                                                                                                                                                 |                                   |                                                                                                                                                                                                                                                |                                                                          |                                                                                                                                                                                                                  |

SUPPLEMENTARY DATA

| Study setting                                 | Country         | Study population                                                                                                                                                                         | Age*                                         | Female gender (%) | Socio-economic & education status                                                                     | Base-line HbA <sub>1c</sub> <sup>a</sup>             | DM duration <sup>a</sup>                  | Personnel involved (overall)            | Frequency & duration of patient/personnel training                                                                                                                                                                                                                                                                                                                          | Patients per group | Curriculum                                                                                                                                                                                                                                                                              | Quality assurance                                                                                        | Attendance rates/intensity                                                                                         |
|-----------------------------------------------|-----------------|------------------------------------------------------------------------------------------------------------------------------------------------------------------------------------------|----------------------------------------------|-------------------|-------------------------------------------------------------------------------------------------------|------------------------------------------------------|-------------------------------------------|-----------------------------------------|-----------------------------------------------------------------------------------------------------------------------------------------------------------------------------------------------------------------------------------------------------------------------------------------------------------------------------------------------------------------------------|--------------------|-----------------------------------------------------------------------------------------------------------------------------------------------------------------------------------------------------------------------------------------------------------------------------------------|----------------------------------------------------------------------------------------------------------|--------------------------------------------------------------------------------------------------------------------|
| Out-patient clinic of a county medical centre | US              | 419 (63.0% T2D; 59.2% metabolic syndrome; 72.6% Hispanic & African Americans, 11.9% Asian & Pacific Islander<br>Active: 212<br>Control: 207                                              | 55.1 (9.6)                                   | 65.6              | <u>Unemployed, disabled or retired:</u> 60.5%<br><br><u>&lt;8<sup>th</sup> grade education:</u> 44.9% | 7.6 (1.7)                                            | NA                                        | Nurse, dietitian                        | <u>Patient education (15 months):</u><br>One-on-one 30-60-min counselling by nurse or dietitian (every 4-6 weekly during 1 <sup>st</sup> 6 months, then every 2-3 months). Total 8-10 visits. Addition telephone contact was offered if required.<br><br><u>Personnel education:</u><br>Trained & supervised by a senior nurse practitioner & study principal investigator. | Individual         | <u>Patient modules:</u><br>Medical management strategies, behavior change, risk reduction plan<br><br><u>Personnel modules:</u><br>individualized care, care coordination, self-management support, treatment guidelines for primary & secondary CVD prevention, behavioral counselling | NA                                                                                                       | <u>Mean contact time for each patient throughout study:</u> 11.2 hours (about 45-min monthly)                      |
| <b>Newman 2009(111)</b>                       |                 |                                                                                                                                                                                          |                                              |                   |                                                                                                       |                                                      |                                           |                                         |                                                                                                                                                                                                                                                                                                                                                                             |                    |                                                                                                                                                                                                                                                                                         |                                                                                                          |                                                                                                                    |
| Secondary care DM clinics in 4 hospitals      | UK              | 404 (41.0% T2D, 57.0% T1D; 92.0% White, 5.0% Asians, 5.0% Black; 41.0% had cardiovascular-renal complications)<br>CGMS: 102<br>Glucowatch: 100<br>Attention control: 100<br>Control: 102 | Median (IQR): 52.0 (41.0 to 63.0)            | 45.0              | <u>Unemployed, disabled or retired:</u> 54%<br><br><u>No qualifications:</u> 22%                      | 9.1 (1.3)                                            | Median (IQR) : 16.0 (10.0 to 25.0)        | Nurse                                   | <u>Patient education (18 months):</u><br>Nurse feedback sessions as below: 1 <sup>st</sup> 3 months: at baseline, 6 & 12 weeks. Subsequently till 18 months: at 6, 12, 18 months. Also, available through phone calls/emails.<br><br><u>Personnel education:</u><br>2-day training                                                                                          | Individual         | <u>Patient modules:</u><br>Lifestyle & medication management<br><br><u>Personnel modules:</u><br>Use of continuous glucose monitoring devices, data interpretation, provision of clinical feedback as appropriate                                                                       | Research nurses met regularly to discuss on cases & ensure common approach                               | NA                                                                                                                 |
| <b>van Bruggen 2008(112)</b>                  |                 |                                                                                                                                                                                          |                                              |                   |                                                                                                       |                                                      |                                           |                                         |                                                                                                                                                                                                                                                                                                                                                                             |                    |                                                                                                                                                                                                                                                                                         |                                                                                                          |                                                                                                                    |
| 30 general practices                          | The Netherlands | 1640 (24.6% had macro-vascular complication)<br>Active: 822<br>Control: 818                                                                                                              | 67.1 (11.4) vs 67.2 (11.9)                   | 50.8              | <u>Primary or technical school:</u> 58.6%                                                             | 7.0 (1.1) vs 7.1 (1.2)                               | 6.6 (6.0) vs 6.6 (5.9)                    | Nurse                                   | Mainly practice & HCP levels of intervention                                                                                                                                                                                                                                                                                                                                | NA                 | NA                                                                                                                                                                                                                                                                                      | NA                                                                                                       | NA                                                                                                                 |
| <b>Grant 2008(113)</b>                        |                 |                                                                                                                                                                                          |                                              |                   |                                                                                                       |                                                      |                                           |                                         |                                                                                                                                                                                                                                                                                                                                                                             |                    |                                                                                                                                                                                                                                                                                         |                                                                                                          |                                                                                                                    |
| 11 primary care practices                     | US              | 244 (88.5% White)<br>Active: 126<br>Control: 118                                                                                                                                         | 58.8 (10.1) vs 53.3 (12.3)                   | 49.2              | <u>Medicare or Medicaid:</u> 28.3%                                                                    | 7.3 (1.5) vs 7.4 (1.6)                               | NA                                        | PCP                                     | Mainly practice level of intervention, with more patients' engagement                                                                                                                                                                                                                                                                                                       | Individual         | <u>Patient modules (months):</u><br>Online medication module to review medications list, edit inaccuracies, answer on adherence barrier & side effects. Formulation of Diabetes Care Plan to be discussed during clinic visit.                                                          | NA                                                                                                       | Among patients with active accounts, the rate of consent to join the intervention was 39% & 35% in the control arm |
| <b>Smith 2008(114)</b>                        |                 |                                                                                                                                                                                          |                                              |                   |                                                                                                       |                                                      |                                           |                                         |                                                                                                                                                                                                                                                                                                                                                                             |                    |                                                                                                                                                                                                                                                                                         |                                                                                                          |                                                                                                                    |
| 6 primary care practices                      | US              | 639 (93.2% T2D; 10-year UKPDS CHD risk 16-18%)<br>Active: 360<br>Control: 279                                                                                                            | Median (IQR): 62 (22 to 92) vs 60 (27 to 90) | 52.8              | NA                                                                                                    | Median (IQR): 7.3 (5.2 to 15.1) vs 7.3 (4.2 to 15.5) | Median (IQR) : 4 (0 to 43) vs 4 (0 to 47) | Endocrinologist, PCP, diabetes educator | Mainly practice & HCP levels of intervention                                                                                                                                                                                                                                                                                                                                | NA                 | NA                                                                                                                                                                                                                                                                                      | Endocrine specialty review was 2-3-h weekly rotated among 3 endocrinologists. Average time of review was | 59% of PCP considered the specialty messages useful.                                                               |

SUPPLEMENTARY DATA

| Study setting                       | Country                           | Study population                                                                                                                                    | Age*                                         | Female gender (%) | Socio-economic & education status      | Base-line HbA <sub>1c</sub> <sup>a</sup>           | DM duration <sup>a</sup>                                 | Personnel involved (overall)                                              | Frequency & duration of patient/personnel training                                                                        | Patients per group | Curriculum                                                                                                                                                                                                                                                                         | Quality assurance                                                                                                               | Attendance rates/intensity                                                                          |
|-------------------------------------|-----------------------------------|-----------------------------------------------------------------------------------------------------------------------------------------------------|----------------------------------------------|-------------------|----------------------------------------|----------------------------------------------------|----------------------------------------------------------|---------------------------------------------------------------------------|---------------------------------------------------------------------------------------------------------------------------|--------------------|------------------------------------------------------------------------------------------------------------------------------------------------------------------------------------------------------------------------------------------------------------------------------------|---------------------------------------------------------------------------------------------------------------------------------|-----------------------------------------------------------------------------------------------------|
|                                     |                                   |                                                                                                                                                     |                                              |                   |                                        |                                                    |                                                          |                                                                           |                                                                                                                           |                    |                                                                                                                                                                                                                                                                                    | 4.4-min.                                                                                                                        |                                                                                                     |
| <b>Peterson 2008(115)</b>           |                                   |                                                                                                                                                     |                                              |                   |                                        |                                                    |                                                          |                                                                           |                                                                                                                           |                    |                                                                                                                                                                                                                                                                                    |                                                                                                                                 |                                                                                                     |
| 24 community primary care practices | US                                | 7101 (17.7% had myocardial infarction) Active: 3970 Control: 3131                                                                                   | 62.4 (0.91) vs 63.2 (0.92)                   | 49.7              | NA                                     | Mean 7.25 vs 7.33 (no SD)                          | NA                                                       | MDT (not specified), site coordinator                                     | Mainly practice & HCP levels of intervention                                                                              | NA                 | NA                                                                                                                                                                                                                                                                                 | Monthly performance reports review chaired by the local physician champion.                                                     | NA                                                                                                  |
| <b>Christian 2008(116)</b>          |                                   |                                                                                                                                                     |                                              |                   |                                        |                                                    |                                                          |                                                                           |                                                                                                                           |                    |                                                                                                                                                                                                                                                                                    |                                                                                                                                 |                                                                                                     |
| 2 community health centres          | Colorado, US                      | 310 (Hispanics/Latinos with T2D & BMI ≥25.0 kg/m <sup>2</sup> ) Active: 155 Control: 155                                                            | 53.0 (11.25) vs 53.4 (10.7)                  | 66.1              | NA                                     | 8.08 (2.02) vs 8.29 (1.93)                         | NA                                                       | PCP                                                                       | <u>Patient education (12 months):</u> Availability of pre-visit 4 to 5-page personalized report to be discussed with PCP. | Individual         | <u>Patient modules:</u> Calorie intake, exercise, motivation, barriers to lifestyle changes, goal-setting                                                                                                                                                                          | NA                                                                                                                              | NA                                                                                                  |
| <b>Duran 2008(117)</b>              |                                   |                                                                                                                                                     |                                              |                   |                                        |                                                    |                                                          |                                                                           |                                                                                                                           |                    |                                                                                                                                                                                                                                                                                    |                                                                                                                                 |                                                                                                     |
| Hospital & primary care practice    | Madrid, Spain                     | 126 (T2D with PVD; 68.1% on statin, 83.6% on RASi) Active: 63 Control: 63                                                                           | Median (IQR): 70 (57 to 76) vs 69 (58 to 74) | 29.3              | NA                                     | Median (IQR): 7.5 (6.5 to 9.2) vs 7.2 (6.5 to 8.5) | Median (IQR): 19.0 (10.0 to 28.0) vs 19.0 (10.0 to 26.0) | DM team, PCP                                                              | Mainly practice& HCP levels of intervention                                                                               | NA                 | NA                                                                                                                                                                                                                                                                                 | NA                                                                                                                              | NA                                                                                                  |
| <b>O’Kane 2008(118)</b>             |                                   |                                                                                                                                                     |                                              |                   |                                        |                                                    |                                                          |                                                                           |                                                                                                                           |                    |                                                                                                                                                                                                                                                                                    |                                                                                                                                 |                                                                                                     |
| Hospital DM clinic                  | Northern Ireland                  | 184 (newly diagnosed T2D aged <70 years) Active: 96 Control: 88                                                                                     | 57.7 (11.0) vs 60.9 (11.5)                   | 45.0              | NA                                     | 8.8 (2.1) vs 8.6 (2.3)                             | Newly diagnosed                                          | DM specialist nurse, dietitian, podiatrist, medical staff (not specified) | <u>Patient education (12 months):</u> Not specified                                                                       | NA                 | SMBG self-management, lifestyle                                                                                                                                                                                                                                                    | NA                                                                                                                              | 63/96 patients performed >80% of requested SMBG (4 fasting & 4 postprandial glucose levels)         |
| <b>Simon 2008(119)</b>              |                                   |                                                                                                                                                     |                                              |                   |                                        |                                                    |                                                          |                                                                           |                                                                                                                           |                    |                                                                                                                                                                                                                                                                                    |                                                                                                                                 |                                                                                                     |
| 48 general practices                | Oxfordshire & South Yorkshire, UK | 453 (non-insulin treated T2D with HbA <sub>1c</sub> ≥6.2%; 22.7% had DM-related complications) More intensive: 151 Less intensive: 150 Control: 152 | 65.7                                         | 42.6              | <u>Skilled manual or manual:</u> 44.8% | 7.5                                                | Median (IQR) 3.0 (2.0-6.0)                               | Nurse                                                                     | <u>Patient education (12 months):</u> Not specified<br><br><u>Nurse training:</u> 6-day case-based learning over 5 weeks  | NA                 | <u>Patient modules:</u> <u>More intensive group:</u> SMBG self-interpretation related to diet, physical activity & medications adherence<br><br><u>Less intensive group:</u> SMBG results interpreted by nurses<br><br><u>Nurse modules:</u> Behavioral change techniques & skills | Scripts on topics were used by nurses. Taped interventions were self-reviewed by nurses & externally reviewed by a sociologist. | <u>Use of glucometer ≥2x/week for 12 months:</u> More intensive 79 (52%) vs Less intensive 99 (67%) |
| <b>Farmer 2007(120)</b>             |                                   |                                                                                                                                                     |                                              |                   |                                        |                                                    |                                                          |                                                                           |                                                                                                                           |                    |                                                                                                                                                                                                                                                                                    |                                                                                                                                 |                                                                                                     |
| 48                                  | Oxford-                           | 453                                                                                                                                                 | 65.7                                         | 42.6              | <u>Skilled manual</u>                  | 7.5                                                | Me-                                                      | Nurse                                                                     | As above                                                                                                                  | NA                 | As above                                                                                                                                                                                                                                                                           | As above                                                                                                                        | As above                                                                                            |

SUPPLEMENTARY DATA

| Study setting             | Country                     | Study population                                                                                                                                | Age*                       | Female gender (%) | Socio-economic & education status                             | Base-line HbA <sub>1c</sub> <sup>a</sup> | DM duration <sup>a</sup>       | Personnel involved (overall)                                    | Frequency & duration of patient/personnel training                                                                                                                                                                                                          | Patients per group                          | Curriculum                                                                                                                            | Quality assurance                                                    | Attendance rates/intensity |
|---------------------------|-----------------------------|-------------------------------------------------------------------------------------------------------------------------------------------------|----------------------------|-------------------|---------------------------------------------------------------|------------------------------------------|--------------------------------|-----------------------------------------------------------------|-------------------------------------------------------------------------------------------------------------------------------------------------------------------------------------------------------------------------------------------------------------|---------------------------------------------|---------------------------------------------------------------------------------------------------------------------------------------|----------------------------------------------------------------------|----------------------------|
| general practices         | shire & South Yorkshire, UK | (non-insulin treated T2D with HbA <sub>1c</sub> ≥6.2%; 22.7% had DM-related complications) More intensive: 151 Less intensive: 150 Control: 152 |                            |                   | <u>or manual:</u><br>44.8%                                    |                                          | dian (IQR) 3.0 (2.0-6.0)       |                                                                 |                                                                                                                                                                                                                                                             |                                             |                                                                                                                                       |                                                                      |                            |
| <b>Lorig 2008(121)</b>    |                             |                                                                                                                                                 |                            |                   |                                                               |                                          |                                |                                                                 |                                                                                                                                                                                                                                                             |                                             |                                                                                                                                       |                                                                      |                            |
| Primary care              | San Francisco, US           | 567 (Latinos) Active: 369 Control: 198                                                                                                          | 52.9 (13.2) vs 52.8 (13.4) | 45.5              | <u>Mean years of education:</u><br>7.68 (4.49) vs 7.30 (4.54) | 7.44 (2.00) vs 7.38 (1.87)               | NA                             | 2 trained PL                                                    | Patient education (2 stages):<br>SDSMP: 2.5-h weekly for 6 weeks. Class size was 10-15 patients. Followed by telephone reinforcement for 18 months                                                                                                          | 2 PL to 10-15 patients                      | Patient modules:<br>DM complications, self-management (lifestyle, hypoglycemia, SMBG, foot care), sick days' rules, stress management | Staff observations on PL through 2 practice sessions.                | NA                         |
|                           |                             |                                                                                                                                                 |                            |                   |                                                               |                                          |                                |                                                                 | <u>PL training:</u><br>4-day interactive training                                                                                                                                                                                                           |                                             | Not specified                                                                                                                         |                                                                      |                            |
| <b>Dijkstra 2008(122)</b> |                             |                                                                                                                                                 |                            |                   |                                                               |                                          |                                |                                                                 |                                                                                                                                                                                                                                                             |                                             |                                                                                                                                       |                                                                      |                            |
| 40 primary care practices | The Netherlands             | 993 Active: 504 Control: 489                                                                                                                    | 63.2 (9.9) vs 63.6 (9.2)   | 49.7              | NA                                                            | NA                                       | 5.6 (5.9) vs 6.6 (6.8)         | MDT (PCP, PN, practice assistants)                              | Mainly practice & HCP levels of intervention                                                                                                                                                                                                                | NA                                          | Introduction of DM passport                                                                                                           | NA                                                                   | NA                         |
| <b>Bellary 2008(123)</b>  |                             |                                                                                                                                                 |                            |                   |                                                               |                                          |                                |                                                                 |                                                                                                                                                                                                                                                             |                                             |                                                                                                                                       |                                                                      |                            |
| 21 general practices      | Coventry & Birmingham, UK   | 1486 (South Asians; 18.0% had CVD; 28.0% with albuminuria) Active: 868 Control: 618                                                             | 57.0 (11.9)                | 48.0              | NA                                                            | 8.2 (1.9)                                | <10 years: 68.0%               | MDT (PCP, PN, 2 community DM specialist nurses), 5 link workers | Patient education (24 months):<br>Research DM clinic by PN (4-h practice/week). Patient's follow up every 2 months. 2 community DM specialist nurses attended research clinics every 6-8 weeks.                                                             | Individual. 5 link workers to 21 practices. | Patient modules:<br>Lifestyle modifications, insulin initiation & self-management                                                     | Quarterly observations by DM specialist nurses on care offered by PN | NA                         |
|                           |                             |                                                                                                                                                 |                            |                   |                                                               |                                          |                                |                                                                 | <u>Link workers training:</u><br>Completed a DM management & care foundation course (equivalent to diploma). Attended PN's research DM clinics.<br><br><u>PN training:</u><br>Formally trained in DM. Had 1:1 observed sessions with a DM specialist nurse. |                                             | <u>Personnel modules:</u><br>Not specified                                                                                            |                                                                      |                            |
| <b>O'Hare 2004(124)</b>   |                             |                                                                                                                                                 |                            |                   |                                                               |                                          |                                |                                                                 |                                                                                                                                                                                                                                                             |                                             |                                                                                                                                       |                                                                      |                            |
| 6 general practices       | Coventry & Birmingham, UK   | 361 (South Asians) Active: 182 Control: 179                                                                                                     | 58.9 (11.7)                | 49.0              | NA                                                            | 8.0 (2.0)                                | Median (IQR) 6.5 (3.0 to 11.0) | MDT (PCP, PN, 2 community DM specialist nurses), 5 link workers | As above, except 12-month duration.                                                                                                                                                                                                                         | As above                                    | As above                                                                                                                              | As above                                                             | NA                         |
| <b>Eccles 2007(125)</b>   |                             |                                                                                                                                                 |                            |                   |                                                               |                                          |                                |                                                                 |                                                                                                                                                                                                                                                             |                                             |                                                                                                                                       |                                                                      |                            |

SUPPLEMENTARY DATA

| Study setting                                    | Country                                  | Study population                                                                                                           | Age*                       | Female gender (%) | Socio-economic & education status               | Base-line HbA <sub>1c</sub> <sup>a</sup>           | DM duration <sup>a</sup>                             | Personnel involved (overall)                       | Frequency & duration of patient/personnel training                                                                                                                                                                                                                                                                                                                                                                                  | Patients per group              | Curriculum                                                                | Quality assurance                                                      | Attendance rates/intensity |
|--------------------------------------------------|------------------------------------------|----------------------------------------------------------------------------------------------------------------------------|----------------------------|-------------------|-------------------------------------------------|----------------------------------------------------|------------------------------------------------------|----------------------------------------------------|-------------------------------------------------------------------------------------------------------------------------------------------------------------------------------------------------------------------------------------------------------------------------------------------------------------------------------------------------------------------------------------------------------------------------------------|---------------------------------|---------------------------------------------------------------------------|------------------------------------------------------------------------|----------------------------|
| 58 general practices                             | 3 primary care trusts, Northeast England | 3608 (aged >35 years)<br>Active: 1674<br>Control: 1934                                                                     | 65.7 (11.8) vs 66.6 (11.3) | 47.3              | NA                                              | 7.4                                                | NA                                                   | PN, DM register facilitator                        | <u>Patient education (15 months):</u><br>Distribution of newsletter.<br><br><u>PN training:</u><br>Evening meetings with small group discussion, meetings with practice clinical governance leads, telephone meeting with the practice DM leads (usually PN as well)                                                                                                                                                                | NA                              | Not specified for both                                                    | NA                                                                     | NA                         |
| <b>Herrin 2007(126)</b>                          |                                          |                                                                                                                            |                            |                   |                                                 |                                                    |                                                      |                                                    |                                                                                                                                                                                                                                                                                                                                                                                                                                     |                                 |                                                                           |                                                                        |                            |
| 22 family medicine & internal medicine practices | North Texas, US                          | 2007 (Medicare beneficiaries aged ≥65 with T2D; 89.3% White, 7.9% Black)<br>DQIP + nurse: 600<br>DQIP: 811<br>Control: 596 | 72.9                       | 50.2              | <u>Socio-economic status score:</u><br>53.4/100 | NA                                                 | NA                                                   | CDE                                                | Mainly practice & HCP level of intervention.<br><br><u>CDE training:</u><br>RN with 3-5 years' experiences in CDE.                                                                                                                                                                                                                                                                                                                  | NA                              | Not specified                                                             | CDE's care protocols were developed & approved by a quality committee. | NA                         |
| <b>Herrin 2006(127)</b>                          |                                          |                                                                                                                            |                            |                   |                                                 |                                                    |                                                      |                                                    |                                                                                                                                                                                                                                                                                                                                                                                                                                     |                                 |                                                                           |                                                                        |                            |
| 22 family medicine & internal medicine practices | North Texas, US                          | 1891 (Medicare beneficiaries aged ≥65 with T2D; 89.3% White, 7.9% Black)<br>DQIP + nurse: 568<br>DQIP: 758<br>Control: 565 | 72.9                       | 50.2              | <u>Socio-economic status score:</u><br>53.4/100 | 7.1 (1.4) vs 7.2 (1.4) vs 7.2 (1.5)                | NA                                                   | CDE                                                | As above                                                                                                                                                                                                                                                                                                                                                                                                                            | NA                              | NA                                                                        | As above                                                               | NA                         |
| <b>Thomas 2007(128)</b>                          |                                          |                                                                                                                            |                            |                   |                                                 |                                                    |                                                      |                                                    |                                                                                                                                                                                                                                                                                                                                                                                                                                     |                                 |                                                                           |                                                                        |                            |
| A resident community clinic                      | Mayo Clinic, US                          | 483<br>Active: 252<br>Control: 231                                                                                         | NA                         | NA                | NA                                              | Mean (95% CI) 7.3 (7.1 to 7.5) vs 7.4 (7.2 to 7.7) | NA                                                   | NA                                                 | Mainly practice & HCP levels of interventions.                                                                                                                                                                                                                                                                                                                                                                                      | NA                              | NA                                                                        | NA                                                                     | NA                         |
| <b>Johansen 2007(129)</b>                        |                                          |                                                                                                                            |                            |                   |                                                 |                                                    |                                                      |                                                    |                                                                                                                                                                                                                                                                                                                                                                                                                                     |                                 |                                                                           |                                                                        |                            |
| A secondary referral centre                      | Norway                                   | 120 (48.0% had family history of premature CHD; mean baseline 10-year UKPDS CHD risk 18%)<br>Active: 60<br>Control: 60     | 59 (9) vs 58 (11)          | 25.8              | NA                                              | 7.5 (1.5) vs 7.6 (1.6)                             | Median (IQR): 4.0 (1.0 to 10.0) vs 3.0 (1.0 to 12.0) | MDT (physician, nurse, dietitian, physiotherapist) | <u>Patient education (24 months):</u><br>Lifestyle modification program with pharmacological treatment unchanged for 6 months → medications titration among those failed to achieve treatment targets.<br><br>Delivered by physician & nurse in 2 sessions (5-h duration). One individual 45-min session with a dietitian, 10-week training program with a physiotherapist. Refund for attending a gymnasium. Every 3 monthly 15-20 | Individual, group (12 patients) | Different non-pharmacological treatment options; exercise training diary. | NA                                                                     | NA                         |

SUPPLEMENTARY DATA

| Study setting                           | Country        | Study population                                                                                                     | Age*                       | Female gender (%) | Socio-economic & education status                                    | Base-line HbA <sub>1c</sub> <sup>a</sup> | DM duration <sup>a</sup> | Personnel involved (overall) | Frequency & duration of patient/personnel training                                                                                                                                                       | Patients per group                      | Curriculum                                                                                                                                                                                                                                                                        | Quality assurance                                                                                                                                                       | Attendance rates/intensity                                                    |
|-----------------------------------------|----------------|----------------------------------------------------------------------------------------------------------------------|----------------------------|-------------------|----------------------------------------------------------------------|------------------------------------------|--------------------------|------------------------------|----------------------------------------------------------------------------------------------------------------------------------------------------------------------------------------------------------|-----------------------------------------|-----------------------------------------------------------------------------------------------------------------------------------------------------------------------------------------------------------------------------------------------------------------------------------|-------------------------------------------------------------------------------------------------------------------------------------------------------------------------|-------------------------------------------------------------------------------|
|                                         |                |                                                                                                                      |                            |                   |                                                                      |                                          |                          |                              | min physician's visits.                                                                                                                                                                                  |                                         |                                                                                                                                                                                                                                                                                   |                                                                                                                                                                         |                                                                               |
| <b>Chin 2007(130)</b>                   |                |                                                                                                                      |                            |                   |                                                                      |                                          |                          |                              |                                                                                                                                                                                                          |                                         |                                                                                                                                                                                                                                                                                   |                                                                                                                                                                         |                                                                               |
| 34 primary care practices               | US             | 2364 (under-served T2D; 42.9% White, 30.0% Hispanic or Latinos, 24.5% non-Hispanic Black) Active: 1174 Control: 1190 | 56.9 (14.7) vs 54.5 (13.6) | 64 vs 67          | Medicare or Medicaid: 40.0%                                          | Mean 8.6 (95% CI 8.2 to 9.0)             | NA                       | MDT (not specified)          | <p><u>Patient education (48 months):</u><br/>Bilingual videos, brochures &amp; process of care cards.</p> <p><u>Personnel training:</u><br/>4 two-hour or 8 one-hour learning sessions over 4 months</p> | NA                                      | <p><u>Patient modules:</u><br/>6 key processes of DM care (HbA<sub>1c</sub>, cholesterol, BP, urine microalbumin, dilated eye &amp; foot examinations)</p> <p><u>Personnel modules:</u><br/>DM education, facilitation on patients' behavioral change, motivational interview</p> | 16 one-hour conference calls for troubleshooting. Regional meetings to learn QI techniques & lesson sharing.                                                            | <u>Good implementation of CCM:</u><br>ACTIC scores 6.7-8.1/11 for each domain |
| <b>Perria 2007(131)</b>                 |                |                                                                                                                      |                            |                   |                                                                      |                                          |                          |                              |                                                                                                                                                                                                          |                                         |                                                                                                                                                                                                                                                                                   |                                                                                                                                                                         |                                                                               |
| 295 primary care clusters               | Lazio, Italy   | 6395 (51.5% with BMI ≤ 29 kg/m <sup>2</sup> ) Active: 1973 Passive: 2190 Control: 2232                               | ≥50 years old: 93.9%       | 48.0              | NA                                                                   | NA                                       | ≤10 years: 70.7%         | PCP                          | <p>Mainly practice &amp; HCP levels of intervention</p> <p><u>PCP training:</u><br/>2-day course (interactive &amp; group work sessions)</p>                                                             | NA                                      | <u>PCP modules:</u><br>Implementation of treatment guidelines                                                                                                                                                                                                                     | NA                                                                                                                                                                      | NA                                                                            |
| <b>Clancy 2007(132)</b>                 |                |                                                                                                                      |                            |                   |                                                                      |                                          |                          |                              |                                                                                                                                                                                                          |                                         |                                                                                                                                                                                                                                                                                   |                                                                                                                                                                         |                                                                               |
| Academic affiliated primary care centre | Charleston, US | 186 (T2D with HbA <sub>1c</sub> >8.0%; 82.8% African Americans) Active: 96 Control: 90                               | 56.1                       | 72.0              | Retired or unemployed: 72.6%<br><u>Mean years of education:</u> 10.0 | 9.30 (0.20) vs 8.90 (0.22)               | NA                       | MDT (internist, RN)          | <u>Patient education (12 months):</u><br>Monthly 2-h interactive group visit. Individual visit: when necessary for general health screening & 60-min consultation with physicians.                       | Individual, group (14-17 patients each) | <u>Patient modules:</u><br>Foot care, lifestyle, DM complications, emotional aspects of DM                                                                                                                                                                                        | NA                                                                                                                                                                      | NA                                                                            |
| <b>Bebb 2007(133)</b>                   |                |                                                                                                                      |                            |                   |                                                                      |                                          |                          |                              |                                                                                                                                                                                                          |                                         |                                                                                                                                                                                                                                                                                   |                                                                                                                                                                         |                                                                               |
| 42 general practices                    | Nottingham, UK | 1534 (Insulin-naïve T2D; 9.4% non-White; 32.0% macro-vascular complications) Active: 797 Control: 737                | 64.3 (9.9) vs 64.3 (10.0)  | 40.9              | NA                                                                   | 7.7 (1.4) vs 7.7 (1.5)                   | ≤10 years: 78.6%         | PCP, PN                      | Mainly HCP & patient levels of intervention                                                                                                                                                              | NA                                      | NA                                                                                                                                                                                                                                                                                | NA                                                                                                                                                                      | NA                                                                            |
| <b>Fornos 2006(134)</b>                 |                |                                                                                                                      |                            |                   |                                                                      |                                          |                          |                              |                                                                                                                                                                                                          |                                         |                                                                                                                                                                                                                                                                                   |                                                                                                                                                                         |                                                                               |
| 14 community pharmacies                 | Spain          | 112 (T2D with drug-related problems) Active: 56 Control: 56                                                          | 62.4 (10.5) vs 64.9 (10.9) | NA                | NA                                                                   | 8.4 (1.8) vs 7.8 (1.7)                   | NA                       | PCP, pharmacist              | <p><u>Patient education (13 months):</u><br/>Monthly visit with pharmacists (total 13 sessions).</p> <p><u>Pharmacist training:</u><br/>18-h training</p>                                                | Individual                              | <p><u>Patient modules:</u><br/>DM complications, lifestyle, smoking cessation, foot examination, SMBG, knowledge &amp; adherence to medications.</p> <p><u>Pharmacist modules:</u><br/>DM educational program</p>                                                                 | Administration of knowledge questionnaires at baseline & study end.<br><br>Pharmacists attended clinical sessions & presented results on drug-related problems to PCPs. | NA                                                                            |

SUPPLEMENTARY DATA

| Study setting                                             | Country       | Study population                                                               | Age*                                                                                                              | Female gender (%) | Socio-economic & education status                                                                          | Base-line HbA <sub>1c</sub> <sup>a</sup>                                                                  | DM duration <sup>a</sup>                                             | Personnel involved (overall)           | Frequency & duration of patient/personnel training                                                                                                                                                                                                                                                                                                        | Patients per group | Curriculum                                                                                                                                                                                                                | Quality assurance                                 | Attendance rates/intensity                                                                                                                                                                        |
|-----------------------------------------------------------|---------------|--------------------------------------------------------------------------------|-------------------------------------------------------------------------------------------------------------------|-------------------|------------------------------------------------------------------------------------------------------------|-----------------------------------------------------------------------------------------------------------|----------------------------------------------------------------------|----------------------------------------|-----------------------------------------------------------------------------------------------------------------------------------------------------------------------------------------------------------------------------------------------------------------------------------------------------------------------------------------------------------|--------------------|---------------------------------------------------------------------------------------------------------------------------------------------------------------------------------------------------------------------------|---------------------------------------------------|---------------------------------------------------------------------------------------------------------------------------------------------------------------------------------------------------|
| <b>Gabbay 2006(135)</b>                                   |               |                                                                                |                                                                                                                   |                   |                                                                                                            |                                                                                                           |                                                                      |                                        |                                                                                                                                                                                                                                                                                                                                                           |                    |                                                                                                                                                                                                                           |                                                   |                                                                                                                                                                                                   |
| 2 primary care clinics of a teaching hospital             | US            | 332 (95% T2D, 33.1% had CHD, mainly Caucasians) Active: 150 Control: 812       | 65.0 (12.0) vs 64.0 (20.0)                                                                                        | 45.9              | NA                                                                                                         | 7.4 (1.4) vs 7.36 (1.5)                                                                                   | 10.0 (9.0) vs 9.0 (8.0)                                              | Nurse                                  | <u>Patient education (12 months):</u><br>A 45-60-min baseline visit → 1:1 session at least every 4 months.<br><br><u>Nurse training:</u><br>RN trained at Penn State DM Centre through seminars with a dietitian, CDE & endocrinologist.                                                                                                                  | Individual         | <u>Patient modules:</u><br>behavioral goal-setting, individualized care plan, self-management<br><br><u>Nurse modules:</u><br>DM management protocol                                                                      | NA                                                | NA                                                                                                                                                                                                |
| <b>Wu 2006(136)</b>                                       |               |                                                                                |                                                                                                                   |                   |                                                                                                            |                                                                                                           |                                                                      |                                        |                                                                                                                                                                                                                                                                                                                                                           |                    |                                                                                                                                                                                                                           |                                                   |                                                                                                                                                                                                   |
| Hospital medical clinic                                   | Hong Kong     | 442 (non-compliant polypharmacy Chinese T2D) Active: 219 Control: 223          | 71.2 (9.4) vs 70.5 (11.1)                                                                                         | 51.4              | NA                                                                                                         | NA                                                                                                        | NA                                                                   | Pharmacist                             | <u>Patient education (24 months):</u><br>a 10-15 min telephone call at the midpoint between clinic visits over the study period.                                                                                                                                                                                                                          | NA                 | Nature, side effects, compliance to medications; self-care (lifestyle, SMBG). Misconceptions were clarified.                                                                                                              | NA                                                | <u>Mean number of phone calls over 24 months:</u><br>6-8                                                                                                                                          |
| <b>Harno 2006(137)</b>                                    |               |                                                                                |                                                                                                                   |                   |                                                                                                            |                                                                                                           |                                                                      |                                        |                                                                                                                                                                                                                                                                                                                                                           |                    |                                                                                                                                                                                                                           |                                                   |                                                                                                                                                                                                   |
| Primary care & university hospital outpatient department  | Finland       | 175 (T1D & T2D: no specific breakdown) Active: 101 Control: 74                 | NA                                                                                                                | NA                | NA                                                                                                         | 7.82 (0.13) vs 8.21 (0.18)                                                                                | NA                                                                   | NA                                     | Mainly practice & patient levels of intervention                                                                                                                                                                                                                                                                                                          | NA                 | NA                                                                                                                                                                                                                        | NA                                                | NA                                                                                                                                                                                                |
| <b>O'Connor 2005(138)</b>                                 |               |                                                                                |                                                                                                                   |                   |                                                                                                            |                                                                                                           |                                                                      |                                        |                                                                                                                                                                                                                                                                                                                                                           |                    |                                                                                                                                                                                                                           |                                                   |                                                                                                                                                                                                   |
| 12 primary care clinics (internists or family physicians) | Minnesota, US | 754 (96.7% non-Hispanic White; 13.5% current smokers) Active: 428 Control: 326 | Mean 57.6 vs 58.0 (no SD)                                                                                         | 43.5              | <high school education:<br>18.0%                                                                           | Mean 8.1 vs 8.0 (no SD)                                                                                   | Mean 8.9 vs 7.9 (no SD)                                              | MDT (physician, nurse, a clinic staff) | <u>Patient education (18 months):</u><br>Delivered by physicians & nurses.<br><br><u>Personnel training:</u><br>DM QI team attended the 8 off-site 3-h sessions.                                                                                                                                                                                          | NA                 | <u>Patient modules:</u><br>Self-management, behavioral modifications to achieve goals.<br><br><u>Personnel modules:</u><br>Not specified                                                                                  | Telephone contacts & site visits by research team | NA                                                                                                                                                                                                |
| <b>Gerber 2005(139)</b>                                   |               |                                                                                |                                                                                                                   |                   |                                                                                                            |                                                                                                           |                                                                      |                                        |                                                                                                                                                                                                                                                                                                                                                           |                    |                                                                                                                                                                                                                           |                                                   |                                                                                                                                                                                                   |
| 5 urban public hospitals                                  | Chicago, US   | 244 (95.1% African Americans & Latinos) Active: 122 Control: 122               | <u>Lower literacy:</u><br>57.7 (11.7) vs 60.4 (10.8)<br><br><u>Higher literacy:</u><br>49.4 (12.0) vs 51.8 (11.3) | 66.0              | <u>Annual household income &lt;US\$ 15,000:</u><br>57.0%<br><br><u>&lt;high school education:</u><br>45.5% | <u>Lower literacy:</u><br>8.1 (2.2) vs 8.1 (1.7)<br><br><u>Higher literacy:</u><br>8.3 (2.4) vs 8.3 (2.1) | Median (no IQR): Lower literacy 6 vs 4<br><br>Higher literacy 7 vs 5 | Computer-based                         | <u>Patient education (12 months):</u><br>Bilingual computer-based multimedia application using audio & video to provide information. After each lesson, multiple choice questions were presented for reinforcement. Patients who answered incorrectly received immediate audio feedback. The average time for lesson completion ranged between 10-20 min. | NA                 | "Living Well with Diabetes" <u>module:</u><br>Introduction to DM & management, medications, insulin, lifestyle, stress & depression, oral health & prevention of complications (eye, foot, cardiovascular-renal diseases) | NA                                                | <u>Mean duration of computer use (min):</u><br>53.5 vs 21.3<br><br><u>Intervention group:</u><br>greater computer use in higher health literacy patients (81.0 vs 44.1 min & 4.0 vs 2.1 sessions) |
| <b>McMahon 2005(140)</b>                                  |               |                                                                                |                                                                                                                   |                   |                                                                                                            |                                                                                                           |                                                                      |                                        |                                                                                                                                                                                                                                                                                                                                                           |                    |                                                                                                                                                                                                                           |                                                   |                                                                                                                                                                                                   |
| Department                                                | US            | 104                                                                            | 64.0                                                                                                              | 1.0               | <High school                                                                                               | 10.0                                                                                                      | 12.4                                                                 | Care manager,                          | <u>Patient education (12 months):</u>                                                                                                                                                                                                                                                                                                                     | Individual         | Individualized SMBG                                                                                                                                                                                                       | Phone contacts                                    | 30/52 patients                                                                                                                                                                                    |



SUPPLEMENTARY DATA

| Study setting                                                                 | Country            | Study population                                                                                                         | Age*                       | Female gender (%) | Socio-economic & education status                                                                    | Base-line HbA <sub>1c</sub> <sup>a</sup> | DM duration <sup>a</sup>   | Personnel involved (overall)                                                         | Frequency & duration of patient/personnel training                                                                                                                                                                                                                                                                                                 | Patients per group                | Curriculum                                                                                                                                              | Quality assurance                                                                                                                             | Attendance rates/intensity                                                                                                                                                                                                                |
|-------------------------------------------------------------------------------|--------------------|--------------------------------------------------------------------------------------------------------------------------|----------------------------|-------------------|------------------------------------------------------------------------------------------------------|------------------------------------------|----------------------------|--------------------------------------------------------------------------------------|----------------------------------------------------------------------------------------------------------------------------------------------------------------------------------------------------------------------------------------------------------------------------------------------------------------------------------------------------|-----------------------------------|---------------------------------------------------------------------------------------------------------------------------------------------------------|-----------------------------------------------------------------------------------------------------------------------------------------------|-------------------------------------------------------------------------------------------------------------------------------------------------------------------------------------------------------------------------------------------|
| ment of Veterans Affairs Boston Health Care System                            |                    | (HbA <sub>1c</sub> ≥9.0%)<br>Active: 52<br>Control: 52                                                                   | (7.0) vs 63.0 (7.0)        |                   | <u>education:</u><br>33.7%                                                                           | (0.8) vs 9.9 (0.8)                       | vs 12.2                    | CDE (advanced PN, dietician, pharmacist)                                             | Half-day education session for all patients. Intervention group had access to "MyCareTeam" DM education website, with specific modules & external links.                                                                                                                                                                                           |                                   | recommendation, home BP monitoring (≥3x/week)                                                                                                           | by research team if patients did not log into the website for 2 weeks.                                                                        | logged in to the website at least once in every 3 months.                                                                                                                                                                                 |
| <b>Rothman 2005(141)</b>                                                      |                    |                                                                                                                          |                            |                   |                                                                                                      |                                          |                            |                                                                                      |                                                                                                                                                                                                                                                                                                                                                    |                                   |                                                                                                                                                         |                                                                                                                                               |                                                                                                                                                                                                                                           |
| Academic affiliated general internal medicine practice                        | North Carolina, US | 217 (HbA <sub>1c</sub> ≥8.0%, 64.5% African Americans; 43.8% with history of nephropathy)<br>Active: 112<br>Control: 105 | 54.0 (13.0) vs 57.0 (11.0) | 56.2              | <u>Annual household income &lt;US\$ 20,000:</u> 71.4%<br><br><u>&lt;high school education:</u> 73.3% | 11 (3) vs 11 (2)                         | 8 (9) vs 9 (9)             | CDE (pharmacists), DM care coordinator                                               | <u>Patient education (12 months):</u><br>All patients had a 1-h session with a clinical pharmacist. Intervention group received additional education from 3 clinical pharmacists (2 were CDEs) during dedicated clinic slots or in consultation with PCP. Phone contacts every 2-4 weeks. DM care coordinator offered health behavior counselling. | Individual                        | DM education, evidence-based treatment guidelines, proactive management of clinical & laboratory parameters, medication management, health behavior.    | Team members queried the database on patients who failed to meet treatment goals.                                                             | NA                                                                                                                                                                                                                                        |
| <b>Phillips 2005(142)</b>                                                     |                    |                                                                                                                          |                            |                   |                                                                                                      |                                          |                            |                                                                                      |                                                                                                                                                                                                                                                                                                                                                    |                                   |                                                                                                                                                         |                                                                                                                                               |                                                                                                                                                                                                                                           |
| An academic affiliated primary care clinic (345 internal medicine residents ) | Atlanta, US        | 4138 (94.0% African Americans)<br>Feedback + reminder: 1063<br>Feedback: 1049<br>Reminder: 1043<br>Control: 983          | 59.0 (13.0)                | 67.0              | Low socio-economic status                                                                            | 8.1 (2.2)                                | 9.0 (9.0)                  | MDT (physician, nurse-managers, dietitians, podiatrist). Internal medicine residents | <u>Patient education (36 months):</u><br>Not specified<br><br><u>Personnel training (36 months):</u><br>Annual lectures, provision of pocket cards. 5-min feedback sessions every 2 weeks with an endocrinologist.<br><br>Mainly practice & HCP levels of interventions.                                                                           | NA                                | <u>Patient modules:</u><br>SMBG, diet, exercise<br><br><u>Personnel modules:</u><br>DM management, treatment goals & thresholds.                        | Feedback was provided in 97% of scheduled sessions. Attempts to ensure homogeneity of feedback content & style by a combination of "scripts". | NA                                                                                                                                                                                                                                        |
| <b>Glasgow 2005(143)</b>                                                      |                    |                                                                                                                          |                            |                   |                                                                                                      |                                          |                            |                                                                                      |                                                                                                                                                                                                                                                                                                                                                    |                                   |                                                                                                                                                         |                                                                                                                                               |                                                                                                                                                                                                                                           |
| 52 PCPs (internist & family physicians)                                       | Colorado, US       | 886 (80.9% White/non-Hispanic, 12.6% Hispanic)<br>Active: 469<br>Control: 417                                            | 62.0 (1.4) vs 64.0 (1.3)   | 51.2              | <u>Annual household income &lt;US\$ 30,000:</u> 41.2%<br><br><u>&lt;high school education:</u> 13.7% | 7.33 (1.34) vs 7.30 (1.22)               | NA                         | Care managers (nurses or medical assistants)                                         | <u>Patient education (12 months):</u><br>30-min during 2 clinic visits at 6 months apart to complete touch-screen assessment & action planning procedures. Brief follow-up calls after each visit to reinforce information & strategies.                                                                                                           | Individual                        | Diet, SMBG, goal-setting & action plan, smoking cessation                                                                                               | NA                                                                                                                                            | <u>At 6 months:</u><br>Received the computer based interactive assessment: 93%<br><br>Received ≥1 follow-up phone call: 67%<br><br>Discussed the printout with the physician: 73%<br><br>Discussed lifestyle goals with care manager: 77% |
| <b>Dijkstra 2005(144)</b>                                                     |                    |                                                                                                                          |                            |                   |                                                                                                      |                                          |                            |                                                                                      |                                                                                                                                                                                                                                                                                                                                                    |                                   |                                                                                                                                                         |                                                                                                                                               |                                                                                                                                                                                                                                           |
| Internal medicine clinics at 9 general hospitals                              | The Netherlands    | 769 (67.5% T2D, 32.5% T1D)<br>Active: 351<br>Control: 418                                                                | 58.0 (15.0) vs 58.0 (16.0) | 45-50             | NA                                                                                                   | 8.1 (1.3) vs 8.0 (1.2)                   | 14.0 (12.0) vs 17.0 (12.0) | MDT (internist, DM specialist nurse, dietician, podiatrist)                          | <u>Patient education (12 months):</u><br>Educational meetings with local patient organization. Discussion of DM passport with internists.                                                                                                                                                                                                          | Individual, group (not specified) | Goal-setting & strategies to achieve treatment targets, complications screening & prevention, medication adherence, understanding laboratory parameters | Barriers & strategies on DM passport use were discussed in meetings with                                                                      | NA                                                                                                                                                                                                                                        |

SUPPLEMENTARY DATA

| Study setting                                      | Country         | Study population                                                                                                                                     | Age*                                                                                                                                                            | Female gender (%) | Socio-economic & education status | Base-line HbA <sub>1c</sub> <sup>a</sup> | DM duration <sup>a</sup>                  | Personnel involved (overall)                                | Frequency & duration of patient/personnel training                                                                                                                                                                                                                                                                                                                                                                  | Patients per group | Curriculum                                                                                                                                                                                                                                                                       | Quality assurance            | Attendance rates/intensity |
|----------------------------------------------------|-----------------|------------------------------------------------------------------------------------------------------------------------------------------------------|-----------------------------------------------------------------------------------------------------------------------------------------------------------------|-------------------|-----------------------------------|------------------------------------------|-------------------------------------------|-------------------------------------------------------------|---------------------------------------------------------------------------------------------------------------------------------------------------------------------------------------------------------------------------------------------------------------------------------------------------------------------------------------------------------------------------------------------------------------------|--------------------|----------------------------------------------------------------------------------------------------------------------------------------------------------------------------------------------------------------------------------------------------------------------------------|------------------------------|----------------------------|
|                                                    |                 |                                                                                                                                                      |                                                                                                                                                                 |                   |                                   |                                          |                                           |                                                             |                                                                                                                                                                                                                                                                                                                                                                                                                     |                    |                                                                                                                                                                                                                                                                                  | national DM opinion leaders. |                            |
| <b>Dijkstra 2006(145)</b>                          |                 |                                                                                                                                                      |                                                                                                                                                                 |                   |                                   |                                          |                                           |                                                             |                                                                                                                                                                                                                                                                                                                                                                                                                     |                    |                                                                                                                                                                                                                                                                                  |                              |                            |
| Secondary out-patient care at 13 general hospitals | The Netherlands | 764 (T2D only)<br>Patient-centered: 240<br>Professional-directed: 248<br>Control: 276                                                                | 62.8 (12.0) vs 64.0 (11.0) vs 65.4 (10.4)                                                                                                                       | 54.1              | NA                                | 8.0 (1.2) vs 8.1 (1.2) vs 7.9 (1.1)      | 12.2 (10.0) vs 12.6 (11.5) vs 14.6 (10.3) | MDT (internist, DM specialist nurse, dietitian, podiatrist) | <u>Patient education (12 months):</u><br>Educational meetings with local patient organization. Discussion of DM passport with internists.<br><br><u>Personnel education (12 months):</u><br>Educational meetings with DM opinion leaders                                                                                                                                                                            | As above           | <u>Patient modules:</u><br>Goal-setting & strategies to achieve treatment targets, complications screening & prevention, medication adherence, understanding laboratory parameters<br><br><u>Personnel modules:</u><br>Guidelines on prevention & treatment of DM complications. | As above                     | NA                         |
| <b>Mason 2005(146)</b>                             |                 |                                                                                                                                                      |                                                                                                                                                                 |                   |                                   |                                          |                                           |                                                             |                                                                                                                                                                                                                                                                                                                                                                                                                     |                    |                                                                                                                                                                                                                                                                                  |                              |                            |
| A hospital DM centre                               | Salford, UK     | 1407 (94.5% T2D among those with BP ≥140/80 or TC ≥5.0 mmol/L; 19.2% with previous MI/stroke)<br>BP clinic: 506 vs. 508<br>Lipid clinic: 345 vs. 338 | <u>BP clinic:</u><br>median (IQR) 63.5 (55.4 to 72.1) vs 63.7 (56.4 to 71.9)<br><u>Lipid clinic:</u><br>median (IQR) 56.5 (45.1 to 66.9) vs 58.6 (49.3 to 69.6) | 36.3              | NA                                | NA                                       | NA                                        | GP, DM specialist nurse                                     | <u>Patient education (12 months):</u><br>Intervention: Initial 45-min consultation with DM specialist nurse → 30- to 45-min sessions every 4-6 weeks until targets were achieved.<br><br>Control: Follow up with GPs, annual 20-min review with diabetologists.<br><br><u>Personnel education:</u><br>RN (degree level) had training by the local clinicians & pharmacists. GPs had 4-monthly educational sessions. | Individual         | <u>Patient modules:</u><br>Treatment targets, goal-setting & action plan, medications review, low salt/fat diet, weight loss, alcohol, exercise<br><br><u>Personnel modules:</u><br>hypertension & hyperlipidemia guidelines.                                                    | NA                           | NA                         |
| <b>New 2003(147)</b>                               |                 |                                                                                                                                                      |                                                                                                                                                                 |                   |                                   |                                          |                                           |                                                             |                                                                                                                                                                                                                                                                                                                                                                                                                     |                    |                                                                                                                                                                                                                                                                                  |                              |                            |
| A hospital DM centre                               | Salford, UK     | 1407 (94.5% T2D among those with BP ≥140/80 or TC ≥5.0 mmol/L; 19.2% with previous MI/stroke)<br>BP clinic: 506 vs. 508<br>Lipid clinic: 345 vs. 338 | <u>BP clinic:</u><br>median (IQR) 63.5 (55.4 to 72.1) vs 63.7 (56.4 to 71.9)<br><u>Lipid clinic:</u><br>median (IQR) 56.5 (45.1 to 66.9) vs 58.6 (49.3 to 69.6) | 36.3              | NA                                | NA                                       | NA                                        | GP, DM specialist nurse                                     | <u>Patient education (12 months):</u><br>Intervention: Initial 45-min consultation with DM specialist nurse → 30- to 45-min sessions every 4-6 weeks until targets were achieved.<br><br>Control: Follow up with GPs, annual 20-min review with diabetologists.<br><br><u>Personnel education:</u><br>RN (degree level) had training by the local clinicians & pharmacists. GPs had 4-monthly educational sessions. | Individual         | <u>Patient modules:</u><br>Treatment targets, goal-setting & action plan, medications review, low salt/fat diet, weight loss, alcohol, exercise<br><br><u>Personnel modules:</u><br>hypertension & hyperlipidemia guidelines.                                                    | NA                           | NA                         |

SUPPLEMENTARY DATA

| Study setting              | Country         | Study population                                                                                                         | Age*                                      | Female gender (%) | Socio-economic & education status | Base-line HbA <sub>1c</sub> <sup>a</sup>           | DM duration <sup>a</sup>                               | Personnel involved (overall)                | Frequency & duration of patient/personnel training                                                                                                                                            | Patients per group | Curriculum                                                                           | Quality assurance | Attendance rates/intensity             |
|----------------------------|-----------------|--------------------------------------------------------------------------------------------------------------------------|-------------------------------------------|-------------------|-----------------------------------|----------------------------------------------------|--------------------------------------------------------|---------------------------------------------|-----------------------------------------------------------------------------------------------------------------------------------------------------------------------------------------------|--------------------|--------------------------------------------------------------------------------------|-------------------|----------------------------------------|
|                            |                 |                                                                                                                          | 69.6)                                     |                   |                                   |                                                    |                                                        |                                             |                                                                                                                                                                                               |                    |                                                                                      |                   |                                        |
| <b>Clifford 2005(148)</b>  |                 |                                                                                                                          |                                           |                   |                                   |                                                    |                                                        |                                             |                                                                                                                                                                                               |                    |                                                                                      |                   |                                        |
| Community based DM centre  | Australia       | 198 (Anglo-Celt descent; 47.8% known CHD/stroke) Active: 99 Control: 99                                                  | 70.5 (7.1) vs 70.3 (8.3)                  | 47.8              | NA                                | Median (IQR): 7.5 (6.9 to 8.1) vs 7.1 (6.3 to 7.8) | Median (IQR) : 10.0 (7.6 to 14.0) vs 8.0 (6.6 to 12.0) | pharmacist                                  | Patient education (12 months): At baseline, at 6-weekly intervals by telephone, and at face-to-face meetings with clinical pharmacists at 6 & 12 months. Provision of educational materials.  | Individual         | Patient modules: SMBG, lifestyle, medications profile & adherence, smoking cessation | NA                | NA                                     |
| <b>Mehler 2005(149)</b>    |                 |                                                                                                                          |                                           |                   |                                   |                                                    |                                                        |                                             |                                                                                                                                                                                               |                    |                                                                                      |                   |                                        |
| 12 primary care practices  | Colorado, US    | 884 (14.1% current smoker; 29.8% White, 31.2% Hispanic, 5.5% African Americans) Electronic: 415 Direct: 146 Control: 323 | 61.6 (11.0) vs 65.3 (14.3) vs 66.0 (12.0) | NA                | NA                                | NA                                                 | NA                                                     | PCP                                         | Mainly practice & HCP levels of intervention                                                                                                                                                  | NA                 | NA                                                                                   | NA                | NA                                     |
| <b>Maljanian 2005(150)</b> |                 |                                                                                                                          |                                           |                   |                                   |                                                    |                                                        |                                             |                                                                                                                                                                                               |                    |                                                                                      |                   |                                        |
| Primary & secondary care   | Connecticut, US | 507 (336 completed follow-up) Active: 176 Control: 160                                                                   | 58.0 (12.7)                               | 53.3              | NA                                | 7.9 (1.8)                                          | 61% within one year                                    | PCP, RN, dietitian                          | Patient education (12 months): 3 4-h classes & 12 weekly phone calls. First call was 15-20 mins in length, subsequent calls were 5-7 mins in duration. Individual visits with RN & dietitian. | Individual, group  | Patient modules: Basic DM education, self-management skills                          | NA                | Median number of programme visits: 3.7 |
| <b>Simmons 2004(151)</b>   |                 |                                                                                                                          |                                           |                   |                                   |                                                    |                                                        |                                             |                                                                                                                                                                                               |                    |                                                                                      |                   |                                        |
| 135 general practitioners  | New Zealand     | 398 (25.6% T1D, 74.4% T2D; 13.8% had CHD) Active: 222 Control: 176                                                       | 49.0 (10.0) vs 54.0 (10.0)                | 47.0              | NA                                | 9.4 (1.5) vs 9.2 (1.6)                             | Age at diagnosis: mean (SD) 39 (13) vs 43 (14)         | PCP, clinic practice staffs (not specified) | Mainly practice & patient levels of intervention                                                                                                                                              | NA                 | NA                                                                                   | NA                | NA                                     |
| <b>New 2004(152)</b>       |                 |                                                                                                                          |                                           |                   |                                   |                                                    |                                                        |                                             |                                                                                                                                                                                               |                    |                                                                                      |                   |                                        |

SUPPLEMENTARY DATA

| Study setting                                                            | Country                 | Study population                                                                                                                                  | Age*                                | Female gender (%) | Socio-economic & education status | Base-line HbA <sub>1c</sub> <sup>a</sup> | DM duration <sup>a</sup>            | Personnel involved (overall)                 | Frequency & duration of patient/personnel training                                                                                                                                                                                                                           | Patients per group                | Curriculum                                                                                                                                                                                                   | Quality assurance                                                         | Attendance rates/intensity                                      |
|--------------------------------------------------------------------------|-------------------------|---------------------------------------------------------------------------------------------------------------------------------------------------|-------------------------------------|-------------------|-----------------------------------|------------------------------------------|-------------------------------------|----------------------------------------------|------------------------------------------------------------------------------------------------------------------------------------------------------------------------------------------------------------------------------------------------------------------------------|-----------------------------------|--------------------------------------------------------------------------------------------------------------------------------------------------------------------------------------------------------------|---------------------------------------------------------------------------|-----------------------------------------------------------------|
| 44 general practices                                                     | Salford, England        | 5371 (T2D with BP ≥140/80 or total cholesterol ≥5.0 mmol/L or both)<br>BP clinic: 5178<br>Lipid clinic: 5275 (no breakdown on active and control) | NA                                  | NA                | NA                                | NA                                       | NA                                  | DM specialist nurse, PN, PCP                 | Mainly practice & HCP levels of intervention<br><br><u>Personnel training:</u><br>DM specialist nurses provided educational materials & protocols to PCP & PN.                                                                                                               | NA                                | <u>Personnel modules:</u><br>Treatment algorithm & targets for BP and cholesterol.                                                                                                                           | NA                                                                        | NA                                                              |
| <b>Wolf 2004(153)</b>                                                    |                         |                                                                                                                                                   |                                     |                   |                                   |                                          |                                     |                                              |                                                                                                                                                                                                                                                                              |                                   |                                                                                                                                                                                                              |                                                                           |                                                                 |
| Primary care                                                             | US                      | 147 (79.2% Caucasians; T2D & BMI ≥27.0 kg/m <sup>2</sup> )<br>Active: 73<br>Control: 71                                                           | 53.3 (8.6) vs 53.4 (8.0)            | 60.4              | NA                                | 7.7 (1.6)                                | NA                                  | Dietitians                                   | <u>Patient education (12 months):</u><br>6 individual sessions (total 4-h) & 6 1-h small groups discussion. Had monthly phone contacts.                                                                                                                                      | Individual, group (not specified) | Dietary assessment & 5% weight loss, exercise                                                                                                                                                                | NA                                                                        | 100% attended all individual sessions, 78% attended ≥4 classes. |
| <b>California Medi-Cal 2004(154)</b>                                     |                         |                                                                                                                                                   |                                     |                   |                                   |                                          |                                     |                                              |                                                                                                                                                                                                                                                                              |                                   |                                                                                                                                                                                                              |                                                                           |                                                                 |
| One community-based & 2 university-based clinics                         | Southern California, US | 362 (54.7% African Americans & Hispanic on Medicaid, 35.5% White; HbA <sub>1c</sub> ≥7.5%)<br>Active: 188<br>Control: 174                         | Mean (SE): 57.0 (0.9) vs 56.9 (1.0) | 71.8              | ≤12 <sup>th</sup> grade; 79.9%    | Mean (SE): 9.6 (0.1) vs 9.7 (0.1)        | Mean (SE): 10.3 (0.8) vs 12.0 (0.8) | GP, nurses, dietitians                       | <u>Patient education (36 months):</u><br>Not specified. Had telephone contacts when necessary.                                                                                                                                                                               | Individual                        | Glucometer use, SMBG records & on-going assessment, diet, exercise, self-care behaviors.                                                                                                                     | NA                                                                        | NA                                                              |
| <b>Krein 2004(155)</b>                                                   |                         |                                                                                                                                                   |                                     |                   |                                   |                                          |                                     |                                              |                                                                                                                                                                                                                                                                              |                                   |                                                                                                                                                                                                              |                                                                           |                                                                 |
| 2 academically affiliated Department of Veterans Affairs Medical Centres | Michigan, US            | 246 (HbA <sub>1c</sub> ≥8.5%; 58.5% White)<br>Active: 123<br>Control: 123                                                                         | 61.0 (10.0) vs 61.0 (11.0)          | 3.3               | ≤12 years of education; 55.3%     | 9.3 (1.5) vs 9.2 (1.4)                   | 11.0 (10.0) vs 11.0 (9.0)           | NCM                                          | <u>Patient education (18 months):</u><br>NCM-patient phone contacts & face-to-face if necessary.<br><br><u>NCM training:</u><br>2-day interactive course initially, training updates & reinforcement at 2 months & every 6 months.                                           | 1 NCM to 60-120 patients          | <u>Patient modules:</u><br>Self-management, identification of barriers to self-care, medications adherence<br><br><u>NCM modules:</u><br>Goal-setting, role play & case discussions on treatment algorithms. | NA                                                                        | NA                                                              |
| <b>Smith 2004(156)</b>                                                   |                         |                                                                                                                                                   |                                     |                   |                                   |                                          |                                     |                                              |                                                                                                                                                                                                                                                                              |                                   |                                                                                                                                                                                                              |                                                                           |                                                                 |
| 30 general practices                                                     | North Dublin, Ireland   | 183 (non-insulin treated T2D, 19.1% on statin)<br>Active: 96<br>Control: 87                                                                       | 64.7 (12.3) vs 65.6 (10.8)          | 44.3              | NA                                | 6.85 (1.6) vs 6.6 (1.9)                  | 5.8 (5.1) vs 6.3 (7.4)              | MDT (GP, PN, community DM specialist nurses) | <u>Personnel training (18 months):</u><br>6-week distant learning course with 3 skills sessions on primary DM care. Community DM specialist nurses visited practices for 1-2 half days a month. Practices with PN generally requested to be trained by DM specialist nurses. | Individual, group (not specified) | Basics of DM & complications, dietary assessment, self-management                                                                                                                                            | Feedback from GPs and PNs by semi-structured interview at 1-year of study | NA                                                              |

SUPPLEMENTARY DATA

| Study setting                                       | Country   | Study population                                                                                           | Age*                                         | Female gender (%) | Socio-economic & education status                                                   | Base-line HbA <sub>1c</sub> <sup>a</sup> | DM duration <sup>a</sup>                                  | Personnel involved (overall)   | Frequency & duration of patient/personnel training                                                                                                                                                                                                                                                                             | Patients per group                                                                 | Curriculum                                                                                                                                   | Quality assurance                                                      | Attendance rates/intensity                                                                                        |
|-----------------------------------------------------|-----------|------------------------------------------------------------------------------------------------------------|----------------------------------------------|-------------------|-------------------------------------------------------------------------------------|------------------------------------------|-----------------------------------------------------------|--------------------------------|--------------------------------------------------------------------------------------------------------------------------------------------------------------------------------------------------------------------------------------------------------------------------------------------------------------------------------|------------------------------------------------------------------------------------|----------------------------------------------------------------------------------------------------------------------------------------------|------------------------------------------------------------------------|-------------------------------------------------------------------------------------------------------------------|
| <b>Trento 2004(157)</b>                             |           |                                                                                                            |                                              |                   |                                                                                     |                                          |                                                           |                                |                                                                                                                                                                                                                                                                                                                                |                                                                                    |                                                                                                                                              |                                                                        |                                                                                                                   |
| A hospital-based secondary care DM unit             | Italy     | 112 (non-insulin treated T2D)<br>Active: 56<br>Control: 56                                                 | Median (IQR): 62 (35 to 80) vs 61 (43 to 78) | 45.5              | <high school education:<br>93.8%                                                    | 7.4 (1.4) for both                       | Median (IQR): 9.4 (1 to 23) vs 9.8 (1 to 39) at base-line | Physicians, nurses, dietitians | <u>Patient education (1-5 years):</u><br>Interactive educational workshops (hands-on activities, group work, problem-solving, real-life simulations & role play) facilitated by 1-2 physicians & an educator.<br><br>4-session cycle in years 1 & 2 → 7 sessions in years 3 and 4 → restarted in year 5 for in-depth learning. | <u>Intervention:</u><br>group (not specified)<br><br><u>Control:</u><br>individual | Basics of DM & complications, lifestyle, goal-setting, action plan, smoking cessation, medications adherence, hypoglycemia, sick days' rules | Regular feedback from patients on sessions conducted & topics covered. | <u>Mean duration of group visits:</u><br>≈50 min.<br><br><u>Mean duration of individual visits:</u><br>15-20 min. |
| <b>Trento 2002(158)</b>                             |           |                                                                                                            |                                              |                   |                                                                                     |                                          |                                                           |                                |                                                                                                                                                                                                                                                                                                                                |                                                                                    |                                                                                                                                              |                                                                        |                                                                                                                   |
| A hospital-based secondary care DM unit             | Italy     | 112 (non-insulin treated T2D)<br>Active: 56<br>Control: 56                                                 | Median (IQR): 62 (35 to 80) vs 61 (43 to 78) | 45.5              | <high school education:<br>93.8%                                                    | 7.4 (1.4) for both                       | Median (IQR): 9.4 (1 to 23) vs 9.8 (1 to 39) at base-line | Physicians, nurses, dietitians | As above                                                                                                                                                                                                                                                                                                                       | As above                                                                           | As above                                                                                                                                     | As above                                                               | As above                                                                                                          |
| <b>Trento 2001(159)</b>                             |           |                                                                                                            |                                              |                   |                                                                                     |                                          |                                                           |                                |                                                                                                                                                                                                                                                                                                                                |                                                                                    |                                                                                                                                              |                                                                        |                                                                                                                   |
| A hospital-based secondary care DM unit             | Italy     | 112 (non-insulin treated T2D)<br>Active: 56<br>Control: 56                                                 | Median (IQR): 62 (35 to 80) vs 61 (43 to 78) | 45.5              | <high school education:<br>93.8%                                                    | 7.4 (1.4) for both                       | Median (IQR): 9.4 (1 to 23) vs 9.8 (1 to 39) at base-line | Physicians, nurses, dietitians | As above                                                                                                                                                                                                                                                                                                                       | As above                                                                           | As above                                                                                                                                     | As above                                                               | As above                                                                                                          |
| <b>Ko 2004(160)</b>                                 |           |                                                                                                            |                                              |                   |                                                                                     |                                          |                                                           |                                |                                                                                                                                                                                                                                                                                                                                |                                                                                    |                                                                                                                                              |                                                                        |                                                                                                                   |
| 3 regional DM centres                               | Hong Kong | 180 (Chinese T2D with HbA <sub>1c</sub> 8.0-11.0%)<br>Active: 90<br>Control: 90                            | 55.0 (9.0) vs 56.0 (10.2)                    | 56.2              | NA                                                                                  | 8.6 (1.6) vs 8.4 (1.2)                   | NA                                                        | Physicians, CDE                | <u>Patient education (12 months):</u><br>30-min individual educational sessions with CDE every 3 months after physicians' consultations (total 5 visits of 2.5-h), consisting of feedback & reinforcement.                                                                                                                     | Individual                                                                         | CV risk factors, lifestyle modifications, goal-setting/action plan, smoking cessation                                                        | NA                                                                     | NA                                                                                                                |
| <b>Reiber 2004(161)</b>                             |           |                                                                                                            |                                              |                   |                                                                                     |                                          |                                                           |                                |                                                                                                                                                                                                                                                                                                                                |                                                                                    |                                                                                                                                              |                                                                        |                                                                                                                   |
| 7 Veteran Affairs general internal medicine clinics | US        | 1593 (95.5% T2D; 23.8% prior MI/CABG; 21.9% depression; 67.2% hypertension)<br>Active: 986<br>Control: 607 | Mean 65.7 vs 65.8 (no SD)                    | NA                | <12 years education:<br>16.4%<br><br><u>Annual income &lt;USD\$20,000:</u><br>66.1% | NA                                       | 5 years and below: 36.6%<br><br>6-15 years: 37.6%         | PCP                            | Mainly practice & HCP levels of intervention                                                                                                                                                                                                                                                                                   | NA                                                                                 | NA                                                                                                                                           | NA                                                                     | NA                                                                                                                |

SUPPLEMENTARY DATA

| Study setting            | Country                                | Study population                                                                                  | Age*                                 | Female gender (%) | Socio-economic & education status     | Base-line HbA <sub>1c</sub> <sup>a</sup> | DM duration <sup>a</sup>                             | Personnel involved (overall)      | Frequency & duration of patient/personnel training                                                              | Patients per group | Curriculum                                                                                                        | Quality assurance | Attendance rates/intensity                                                                             |
|--------------------------|----------------------------------------|---------------------------------------------------------------------------------------------------|--------------------------------------|-------------------|---------------------------------------|------------------------------------------|------------------------------------------------------|-----------------------------------|-----------------------------------------------------------------------------------------------------------------|--------------------|-------------------------------------------------------------------------------------------------------------------|-------------------|--------------------------------------------------------------------------------------------------------|
|                          |                                        |                                                                                                   |                                      |                   |                                       |                                          | 16 years and above: 25.8%                            |                                   |                                                                                                                 |                    |                                                                                                                   |                   |                                                                                                        |
| <b>Gaede 2008(162)</b>   |                                        |                                                                                                   |                                      |                   |                                       |                                          |                                                      |                                   |                                                                                                                 |                    |                                                                                                                   |                   |                                                                                                        |
| Steno Diabetes Centre    | Denmark                                | 160 (T2D with micro-albuminuria)<br>Active: 80<br>Control: 80                                     | 54.9 (7.2) vs 55.2 (7.2) at baseline | NA                | NA                                    | 8.4 (1.6) vs 8.8 (1.7) at baseline       | 13.3 (0.4) years follow up from base-line            | MDT (physician, nurse, dietitian) | <u>Patient education (4 years):</u><br>Individual consultations every 3 months.                                 | Individual         | Low fat diet, exercise, smoking cessation, behavior modification                                                  | NA                | 84% and 87% of intervention & control groups were still treated at Steno Diabetes Centre respectively. |
| <b>Gaede 2008(163)</b>   |                                        |                                                                                                   |                                      |                   |                                       |                                          |                                                      |                                   |                                                                                                                 |                    |                                                                                                                   |                   |                                                                                                        |
| Steno Diabetes Centre    | Denmark                                | 160 (T2D with micro-albuminuria)<br>Active: 80<br>Control: 80                                     | 54.9 (7.2) vs 55.2 (7.2) at baseline | NA                | NA                                    | 8.4 (1.6) vs 8.8 (1.7) at baseline       | 7.8 (0.3) years follow up from base-line             | MDT (physician, nurse, dietitian) | As above                                                                                                        | Individual         | As above                                                                                                          | NA                | NA                                                                                                     |
| <b>Gaede 2003(164)</b>   |                                        |                                                                                                   |                                      |                   |                                       |                                          |                                                      |                                   |                                                                                                                 |                    |                                                                                                                   |                   |                                                                                                        |
| Steno Diabetes Centre    | Denmark                                | 160 (T2D with micro-albuminuria)<br>Active: 80<br>Control: 80                                     | 54.9 (7.2) vs 55.2 (7.2) at baseline | NA                | NA                                    | 8.4 (1.6) vs 8.8 (1.7) at baseline       | 7.8 (0.3) years follow up from base-line             | MDT (physician, nurse, dietitian) | As above                                                                                                        | Individual         | As above                                                                                                          | NA                | NA                                                                                                     |
| <b>Gaede 1999(165)</b>   |                                        |                                                                                                   |                                      |                   |                                       |                                          |                                                      |                                   |                                                                                                                 |                    |                                                                                                                   |                   |                                                                                                        |
| Steno Diabetes Centre    | Denmark                                | 160 (T2D with micro-albuminuria)<br>Active: 80<br>Control: 80                                     | 54.9 (7.2) vs 55.2 (7.2) at baseline | 25.6              | NA                                    | 8.4 (1.6) vs 8.8 (1.7) at baseline       | Median (IQR) : 5.5 (2.0 to 8.8) vs 6.0 (4.0 to 10.0) | MDT (physician, nurse, dietitian) | As above                                                                                                        | Individual         | As above                                                                                                          | NA                | NA                                                                                                     |
| <b>Jones 2003(166)</b>   |                                        |                                                                                                   |                                      |                   |                                       |                                          |                                                      |                                   |                                                                                                                 |                    |                                                                                                                   |                   |                                                                                                        |
| Primary care practice    | Southern Ontario & Nova Scotia, Canada | 1029 (T2D & BMI >27.0 kg/m <sup>2</sup> with suboptimal self-care)<br>Active: 529<br>Control: 500 | Mean 54.58 vs 54.86 (no SD)          | 48.4              | NA                                    | Mean 8.49 vs 8.61 (no SD)                | Mean 10.09 vs 11.15 (no SD)                          | MDT (not specified)               | <u>Patient education (12 months):</u><br>Monthly mail or phone contacts.<br>Provision of a general DM handbook. | Individual         | Patient-specific education contents, mainly on behavioral change, SMBG, personal goal-setting & smoking cessation | NA                | NA                                                                                                     |
| <b>Meigs 2003(167)</b>   |                                        |                                                                                                   |                                      |                   |                                       |                                          |                                                      |                                   |                                                                                                                 |                    |                                                                                                                   |                   |                                                                                                        |
| A hospital-based general | Boston, US                             | 598 (71.1% White, 19.1% Black,                                                                    | 68 (12) vs 67 (12)                   | 52.3              | <u>Medicaid or Medicare:</u><br>69.7% | 8.4 (0.1) vs 8.1 (0.1)                   | 9.9 (5.5) vs 9.7                                     | Internal medicine residents       | Mainly practice & HCP levels of interventions                                                                   | NA                 | NA                                                                                                                | NA                | NA                                                                                                     |

SUPPLEMENTARY DATA

| Study setting                                                    | Country             | Study population                                                                                                                                                                                                               | Age*                       | Female gender (%) | Socio-economic & education status                           | Base-line HbA <sub>1c</sub> <sup>a</sup> | DM duration <sup>a</sup> | Personnel involved (overall)          | Frequency & duration of patient/personnel training                                                                                                                                                                                                                        | Patients per group                     | Curriculum                                                                                                                                                                                      | Quality assurance | Attendance rates/intensity                                                                                                                           |
|------------------------------------------------------------------|---------------------|--------------------------------------------------------------------------------------------------------------------------------------------------------------------------------------------------------------------------------|----------------------------|-------------------|-------------------------------------------------------------|------------------------------------------|--------------------------|---------------------------------------|---------------------------------------------------------------------------------------------------------------------------------------------------------------------------------------------------------------------------------------------------------------------------|----------------------------------------|-------------------------------------------------------------------------------------------------------------------------------------------------------------------------------------------------|-------------------|------------------------------------------------------------------------------------------------------------------------------------------------------|
| medicine practices                                               |                     | 51.9% had any cardiovascular complications)<br>Active: 307<br>Control: 291                                                                                                                                                     |                            |                   |                                                             |                                          | (5.6)                    |                                       |                                                                                                                                                                                                                                                                           |                                        |                                                                                                                                                                                                 |                   |                                                                                                                                                      |
| <b>Ilag 2003(168)</b>                                            |                     |                                                                                                                                                                                                                                |                            |                   |                                                             |                                          |                          |                                       |                                                                                                                                                                                                                                                                           |                                        |                                                                                                                                                                                                 |                   |                                                                                                                                                      |
| 9 university-affiliated primary care internal medicine practices | US                  | Year 1: 204<br>Active: 103<br>Control: 111<br><br>Year 2: 154<br>(85.0% T2D, 81.2% Caucasians, 10.4% African Americans)                                                                                                        | 59.0 (14.0) vs 59.0 (12.0) | 53.2              | NA                                                          | HbA <sub>1c</sub> ≤8.0%: 56.0%           | NA                       | RN, CDE                               | <u>Patient education (24 months):</u><br>Review of patients' information booklets with RN or CDE.                                                                                                                                                                         | NA                                     | Importance of medications (aspirin, RASi, statin), prevention of complications, smoking cessation                                                                                               | NA                | NA                                                                                                                                                   |
| <b>Litaker 2003(169)</b>                                         |                     |                                                                                                                                                                                                                                |                            |                   |                                                             |                                          |                          |                                       |                                                                                                                                                                                                                                                                           |                                        |                                                                                                                                                                                                 |                   |                                                                                                                                                      |
| Academic affiliated general medicine clinic                      | Cleveland, Ohio, US | 157 (T2D with stage I-II hypertension; 59.2% African Americans)<br>Active: 79<br>Control: 78                                                                                                                                   | 60.5 (8.5) vs 60.6 (9.6)   | 58.6              | <u>Mean years of education:</u><br>12.9 (2.7) vs 12.3 (3.0) | 8.4 (1.4) vs 8.5 (1.6)                   | NA                       | Nurse                                 | <u>Patient education (12 months):</u><br>In-person office visits & telephone contacts by nurses.<br><br><u>Nurse training:</u><br>Training on DM treatment algorithms by the research team before study started.                                                          | Individual                             | <u>Patient modules:</u><br>Weight control, exercise, smoking cessation, alcohol, dietary sodium restriction, medications adherence & side effects<br><br><u>Nurse modules:</u><br>Not specified | NA                | NA                                                                                                                                                   |
| <b>Taylor 2003(170)</b>                                          |                     |                                                                                                                                                                                                                                |                            |                   |                                                             |                                          |                          |                                       |                                                                                                                                                                                                                                                                           |                                        |                                                                                                                                                                                                 |                   |                                                                                                                                                      |
| Kaiser Permanente Medical Centre                                 | Colorado, US        | 169 (HbA <sub>1c</sub> >10.0% with at least hypertension, hypercholesterolemia or cardiovascular disease; 94.7% T2D; 23.1% had cardiovascular disease; 61.6% Caucasians, 25.4% Black or Hispanic)<br>Active: 84<br>Control: 85 | 55.5 (8.9) vs 54.8 (11.4)  | 47.3              | <u>≤high school education:</u><br>23.7%                     | 9.5 (0.3) for both                       | NA                       | RN                                    | <u>Patient education (12 months):</u><br>IE: 90-min consultation with RN<br>GE: 1- to 2-h interactive sessions, weekly for 4 weeks<br>15-min nurse-patient phone contacts: before 4 <sup>th</sup> group sessions, 5, 8, 12, 16, 20, 28, 36, and 44 weeks into the program | Individual, group (4-10 patients each) | <u>Patient modules:</u><br>Lifestyle, medications, psychosocial status, self-management plan, problem solving, glucose/BP monitoring                                                            | NA                | <u>Mean number of nurse-patient phone contacts:</u><br>12.8 (3.0 to 30.0)<br><br><u>Mean number of nurse-PCP phone contacts:</u><br>3.1 (1.0 to 8.0) |
| <b>Frijling 2002(171)</b>                                        |                     |                                                                                                                                                                                                                                |                            |                   |                                                             |                                          |                          |                                       |                                                                                                                                                                                                                                                                           |                                        |                                                                                                                                                                                                 |                   |                                                                                                                                                      |
| 124 general practices                                            | The Netherlands     | 1410 (38.0% had FPG >8.0 or 2-h PPG >10.0 mmol/L)<br>Active: 703                                                                                                                                                               | 64.8 (11.1) vs 65.6 (12.1) | 55.4              | NA                                                          | NA                                       | NA                       | PCP, facilitator (practice assistant) | <u>Personnel training:</u><br>80-h including 8-h of diabetes education sessions                                                                                                                                                                                           | Individual                             | <u>Personnel modules:</u><br>Diabetes care, organizational & administrative tasks related to study                                                                                              | NA                | 15 outreach visits (1-h in length) per practice by facilitator                                                                                       |

SUPPLEMENTARY DATA

| Study setting                                  | Country                    | Study population                                                                                                           | Age*                              | Female gender (%) | Socio-economic & education status                                                                             | Base-line HbA <sub>1c</sub> <sup>a</sup> | DM duration <sup>a</sup>         | Personnel involved (overall)                                | Frequency & duration of patient/personnel training                                                                                                                                                                                                                                                                                                                                                                                                                                                    | Patients per group                                           | Curriculum                                                                                                                                                                                                                                                                                                             | Quality assurance | Attendance rates/intensity                                                                                                                                                                                                                                                                                    |
|------------------------------------------------|----------------------------|----------------------------------------------------------------------------------------------------------------------------|-----------------------------------|-------------------|---------------------------------------------------------------------------------------------------------------|------------------------------------------|----------------------------------|-------------------------------------------------------------|-------------------------------------------------------------------------------------------------------------------------------------------------------------------------------------------------------------------------------------------------------------------------------------------------------------------------------------------------------------------------------------------------------------------------------------------------------------------------------------------------------|--------------------------------------------------------------|------------------------------------------------------------------------------------------------------------------------------------------------------------------------------------------------------------------------------------------------------------------------------------------------------------------------|-------------------|---------------------------------------------------------------------------------------------------------------------------------------------------------------------------------------------------------------------------------------------------------------------------------------------------------------|
|                                                |                            | Control: 707                                                                                                               |                                   |                   |                                                                                                               |                                          |                                  |                                                             |                                                                                                                                                                                                                                                                                                                                                                                                                                                                                                       |                                                              |                                                                                                                                                                                                                                                                                                                        |                   |                                                                                                                                                                                                                                                                                                               |
| <b>Brown 2002(172)</b>                         |                            |                                                                                                                            |                                   |                   |                                                                                                               |                                          |                                  |                                                             |                                                                                                                                                                                                                                                                                                                                                                                                                                                                                                       |                                                              |                                                                                                                                                                                                                                                                                                                        |                   |                                                                                                                                                                                                                                                                                                               |
| University DM clinic                           | Starr County, Texas, US    | 256 (Mexican Americans T2D with HbA <sub>1c</sub> ≥10.0%; age >35 years) Active: 128 Control: 128                          | 54.7 (8.2) vs 53.3 (8.3)          | 63.9              | Low socio-economic status                                                                                     | 11.8 (3.0)                               | 7.6 (5.8) vs 8.1 (6.9)           | MDT (physician, nurses & dietitians); 8 trained CHW with DM | <p><b>Patient education (12 months):</b> 52-h over 1 year, with follow up till 3 years in preferred language, consisting of 12 weekly 2-h educational sessions, 14 biweekly &amp; 3 monthly 2-h support group sessions. Use of videotapes on delivery of culturally-tailored educational contents by CHW.</p> <p><b>Personnel training:</b> Nurses &amp; dietitians: seminars, supervised practical sessions at university hospital CHW: at least high school graduate. Attended a 8-week course.</p> | Individual, group (8 patients & 1 family member per patient) | <p><b>Patient modules:</b> Culturally tailored self-care counselling (dietary selection, SMBG etc), problem-solving, behavioral change &amp; health-belief, hands-on, family &amp; social support.</p> <p><b>Personnel modules:</b> Nurses &amp; dietitians: DM education &amp; management CHW: DM self-management</p> | NA                | Attendance dropped at week 13 during the transition from focus group to support group sessions. It declined to 50% at study end, but varied based on the group dynamics (some maintained at 100%).                                                                                                            |
| <b>Hirsch 2002(173)</b>                        |                            |                                                                                                                            |                                   |                   |                                                                                                               |                                          |                                  |                                                             |                                                                                                                                                                                                                                                                                                                                                                                                                                                                                                       |                                                              |                                                                                                                                                                                                                                                                                                                        |                   |                                                                                                                                                                                                                                                                                                               |
| University based primary care clinic (2 firms) | Washington, US             | 109 (73.4% White, 26.6% non-White) Active: 44 Control: 65                                                                  | 60.0 vs 57.0                      | 56.0              | Medicaid/Medicaid care: 57.8%                                                                                 | 7.64 vs 7.57                             | NA                               | MDT (physician, pharmacists, nurses, dietitians)            | <p><b>Personnel training (14 months):</b> Traditional tutorials, conferences, email consults, case of the week.</p> <p>Mainly practice &amp; HCP levels of interventions.</p>                                                                                                                                                                                                                                                                                                                         | NA                                                           | NA                                                                                                                                                                                                                                                                                                                     | NA                | NA                                                                                                                                                                                                                                                                                                            |
| <b>Keyserling 2002(174)</b>                    |                            |                                                                                                                            |                                   |                   |                                                                                                               |                                          |                                  |                                                             |                                                                                                                                                                                                                                                                                                                                                                                                                                                                                                       |                                                              |                                                                                                                                                                                                                                                                                                                        |                   |                                                                                                                                                                                                                                                                                                               |
| 7 primary care practices                       | Central North Carolina, US | 200 (African Americans women with poorly controlled T2D; 23.5% had CHD) Clinic & community: 67 Clinic only: 66 Control: 67 | Mean 58.5 vs 59.8 vs 59.2 (no SD) | 100               | <p><u>Annual household income &lt;US\$ 10,000</u>: 29.0%</p> <p><u>Mean years of education</u>: 10.1-11.1</p> | Mean 10.8 vs 11.1 vs 11.3 (no SD)        | Mean 10.8 vs 10.7 vs 9.9 (no SD) | Dietitian, trained PL with T2D                              | <p><b>Patient education (12 months):</b> <b>Clinic &amp; community based:</b> a. 1<sup>st</sup> 6 months - monthly individual counselling visits. Two 90-min group sessions &amp; monthly phone contacts from PL. b. Last 6 months – one 90-min group session &amp; monthly phone contacts from PL.</p> <p><b>Clinic only:</b> had intervention (a) as above</p> <p><b>Minimal intervention:</b> Mailed educational pamphlets.</p> <p><b>PL training:</b> 4 weekly 4-h sessions</p>                   | Individual, group (not specified)                            | <p><b>Patient modules:</b> Patient-specific lifestyle change advice, especially physical activity</p> <p><b>PL modules:</b> Behavioral goals, social support</p>                                                                                                                                                       | NA                | <p><u>Attendance rates &amp; mean duration of individual visits (both intervention groups):</u> Visit 1 - 93% (68-min), Visit 2 - 86% (45-min), Visit 3 - 83% (41-min), Visit 4 - 72% (45-min)</p> <p><u>Mean number of phone contacts with PL:</u> 9.7 (53% were 10 to 20-min in length; 38% &lt;10-min)</p> |
| <b>Pouwer 2001(175)</b>                        |                            |                                                                                                                            |                                   |                   |                                                                                                               |                                          |                                  |                                                             |                                                                                                                                                                                                                                                                                                                                                                                                                                                                                                       |                                                              |                                                                                                                                                                                                                                                                                                                        |                   |                                                                                                                                                                                                                                                                                                               |
| Academic affiliated outpatient                 | Netherlands                | 400 (58.5% T2D, 41.5% T1D; 49.5% with cardiovascular)                                                                      | 53.0 (16.0) vs 54.0 (18.0)        | 52.5              | <u>Mean years of education</u> : 12.0 (3.6) vs 11.0 (3.4)                                                     | 7.8 (1.4) vs 7.8 (1.3)                   | NA                               | DM specialist nurse                                         | <b>Patient education (12 months):</b> Two 15-min monitoring on psychosocial well-being                                                                                                                                                                                                                                                                                                                                                                                                                | Individual                                                   | <b>Patient modules:</b> DM-related topics (not specified), psychosocial well-being questionnaires & discussion                                                                                                                                                                                                         | NA                | NA                                                                                                                                                                                                                                                                                                            |



SUPPLEMENTARY DATA

| Study setting                                                                                     | Country                 | Study population                                                                                     | Age*                       | Female gender (%) | Socio-economic & education status                                                                      | Base-line HbA <sub>1c</sub> <sup>a</sup> | DM duration <sup>a</sup> | Personnel involved (overall)   | Frequency & duration of patient/personnel training                                                                                                                                                                                                                                                                                   | Patients per group                | Curriculum                                                       | Quality assurance | Attendance rates/intensity                                                                                                                                                                                      |
|---------------------------------------------------------------------------------------------------|-------------------------|------------------------------------------------------------------------------------------------------|----------------------------|-------------------|--------------------------------------------------------------------------------------------------------|------------------------------------------|--------------------------|--------------------------------|--------------------------------------------------------------------------------------------------------------------------------------------------------------------------------------------------------------------------------------------------------------------------------------------------------------------------------------|-----------------------------------|------------------------------------------------------------------|-------------------|-----------------------------------------------------------------------------------------------------------------------------------------------------------------------------------------------------------------|
| diabetes clinic                                                                                   |                         | -renal complications)<br>Active: 191<br>Control: 209                                                 |                            |                   |                                                                                                        |                                          |                          |                                | <u>Personnel training:</u><br>Role-play training delivered by 2 psychologists.                                                                                                                                                                                                                                                       |                                   | <u>Personnel modules:</u><br>Counselling skills                  |                   |                                                                                                                                                                                                                 |
| <b>Groeneveld 2001(176)</b>                                                                       |                         |                                                                                                      |                            |                   |                                                                                                        |                                          |                          |                                |                                                                                                                                                                                                                                                                                                                                      |                                   |                                                                  |                   |                                                                                                                                                                                                                 |
| 15 primary care practices                                                                         | Leiden, The Netherlands | 246 (3.3% insulin treated T2D)<br>Active: 91<br>Control: 155                                         | 62.7 (11.0) vs 62.3 (10.0) | 58.1              | NA                                                                                                     | FPG: 10.4 (3.8) vs 9.7 (3.5)             | 4.1 (3.7) vs 4.6 (4.0)   | MDT (nurses, dietitians)       | Mainly practice & patient levels of intervention                                                                                                                                                                                                                                                                                     | NA                                | NA                                                               | NA                | NA                                                                                                                                                                                                              |
| <b>Wagner 2001(177)</b>                                                                           |                         |                                                                                                      |                            |                   |                                                                                                        |                                          |                          |                                |                                                                                                                                                                                                                                                                                                                                      |                                   |                                                                  |                   |                                                                                                                                                                                                                 |
| 36 primary care practices                                                                         | Washington, US          | 707 (68.9% Caucasians, 31.1% non-Caucasians; age ≥30 years)<br>Active: 278<br>Control: 429           | Mean 61.2 vs 60.4 (no SD)  | 47.1              | <u>Annual household income &lt;US\$ 15,000:</u> 92.0%<br><br><u>≤12 years of education:</u> 10.9%      | Mean 7.5 vs 7.4 (no SD)                  | NA                       | MDT (PCP, nurses, pharmacists) | <u>Patient education (24 months):</u><br>Chronic care clinics every 3-6 months, consisting of individual visits with PN & an interactive group educational.                                                                                                                                                                          | Individual, group (6-10 patients) | DM self-management                                               | NA                | Among patients attended at least 1 chronic care clinic, 2/3 joined 3-6 clinics throughout the study period.                                                                                                     |
| <b>Kiefe 2001(178)</b>                                                                            |                         |                                                                                                      |                            |                   |                                                                                                        |                                          |                          |                                |                                                                                                                                                                                                                                                                                                                                      |                                   |                                                                  |                   |                                                                                                                                                                                                                 |
| 70 community physicians: family medicine (37.1%), internal medicine (55.7%), endocrinology (2.9%) | Alabama, US             | 1931 (35.9% White, 19.8% Black; 39.2% had CHD)<br>Active: 965<br>Control: 966                        | Mean 75.9 vs 76.1 (no SD)  | NA                | <u>Urban practice:</u> 52.9%<br><br><u>Rural practice:</u> 35.7%<br><br><u>Suburban practice:</u> 7.1% | NA                                       | NA                       | Physicians                     | Mainly practice & HCP levels of intervention                                                                                                                                                                                                                                                                                         | NA                                | NA                                                               | NA                | NA                                                                                                                                                                                                              |
| <b>Piette 2001(179)</b>                                                                           |                         |                                                                                                      |                            |                   |                                                                                                        |                                          |                          |                                |                                                                                                                                                                                                                                                                                                                                      |                                   |                                                                  |                   |                                                                                                                                                                                                                 |
| 3 general medicine & one university-affiliated Veteran Affairs DM clinics                         | US                      | 292 (60.3% White, 30.5% Black or Hispanic; 44% HbA <sub>1c</sub> ≥8%)<br>Active: 146<br>Control: 146 | 60.0 (10.0) vs 61.0 (10.0) | 2.9               | <u>Annual household income &lt;US\$ 10,000:</u> 21.3%                                                  | 8.2 (1.7) vs 8.1 (1.7)                   | NA                       | RN                             | <u>Patient education (12 months):</u><br>Generation of automated health promotional messages after self-care information was uploaded, coupled with weekly telephone nurse follow up. Periodic phone contacts to reinforce on educational information or to follow up on non-compliant patients. Frequency was based individualized. | Individual                        | DM self-care, prevention of complications, medications adherence | NA                | <u>Mean number of ATDM contacts per patient:</u> 15 (8)<br><br><u>Mean number of telephone nurse contacts per patient:</u> 13 (8)<br><br><u>Mean total hours of telephone nurse contacts (hours):</u> 3.8 (3.0) |
| <b>Piette 2000(180)</b>                                                                           |                         |                                                                                                      |                            |                   |                                                                                                        |                                          |                          |                                |                                                                                                                                                                                                                                                                                                                                      |                                   |                                                                  |                   |                                                                                                                                                                                                                 |
| 2 general medicine clinics                                                                        | US                      | 280 (49.6% Hispanic; 29.0% White; >50% had ≥1                                                        | 56.0 (10.0) vs 53.0 (10.0) | 58.9              | <u>Annual household income &lt;US\$ 10,000:</u> 58.1%                                                  | 8.8 (1.8) vs 8.6 (1.8)                   | NA                       | RN                             | As above                                                                                                                                                                                                                                                                                                                             | Individual                        | As above                                                         | NA                | <u>Mean number of ATDM contacts per patient:</u> 17 (12)                                                                                                                                                        |

## SUPPLEMENTARY DATA

| Study setting              | Country | Study population                                                                                       | Age*                       | Female gender (%) | Socio-economic & education status                     | Base-line HbA <sub>1c</sub> <sup>a</sup> | DM duration <sup>a</sup> | Personnel involved (overall) | Frequency & duration of patient/personnel training | Patients per group | Curriculum | Quality assurance | Attendance rates/intensity                                                                                                                                                                                                                                   |
|----------------------------|---------|--------------------------------------------------------------------------------------------------------|----------------------------|-------------------|-------------------------------------------------------|------------------------------------------|--------------------------|------------------------------|----------------------------------------------------|--------------------|------------|-------------------|--------------------------------------------------------------------------------------------------------------------------------------------------------------------------------------------------------------------------------------------------------------|
|                            |         | DM-related complications)<br>Active: 137<br>Control: 143                                               |                            |                   |                                                       |                                          |                          |                              |                                                    |                    |            |                   | <u>Mean number of telephone nurse contacts per patient:</u><br>6 (4)<br><br><u>Mean total hours of telephone nurse contacts (min):</u><br>70 (13)                                                                                                            |
| <b>Piette 2000(181)</b>    |         |                                                                                                        |                            |                   |                                                       |                                          |                          |                              |                                                    |                    |            |                   |                                                                                                                                                                                                                                                              |
| 2 general medicine clinics | US      | 280 (49.6% Hispanic; 29.0% White; >50% had ≥1 DM-related complications)<br>Active: 137<br>Control: 143 | 56.0 (10.0) vs 53.0 (10.0) | 58.9              | <u>Annual household income &lt;US\$ 10,000:</u> 58.1% | 8.8 (1.8) vs 8.6 (1.8)                   | NA                       | RN                           | As above                                           | Individual         | As above   | NA                | <u>Mean number of ATDM contacts per patient:</u><br>17.1 (13.1 biweekly, 4.0 self-care education calls)<br><br><u>Mean number of telephone nurse contacts per patient:</u><br>5.6<br><br><u>Mean duration of each telephone nurse contact (min):</u><br>12.4 |

\*Age and DM duration were quoted in years. Data shown were baseline results at randomization quoted as mean (standard deviation), unless stated otherwise.

All parameters were in SI units and documented as intervention versus control arms, unless stated otherwise. To convert HbA<sub>1c</sub> to mmol/mol = (10.93\*NGSP) – 23.50. To convert LDL-C to mg/dL, multiply by 38.67.

Abbreviations: ADA, American Diabetes Association; AADE, American Association of Diabetes Educators; ATDM, automated telephone disease management; AQIP, Advanced quality improvement program; CCM, Chronic Care Model; CDE, certified diabetes educator; CDSMP, chronic disease self-management program; CHD, coronary heart disease; CHW, community health workers; CKD, chronic kidney disease; CPDS, coach PCP portal with decision support; CPP, coach PCP portal; COPD, chronic obstructive pulmonary disease; DM, diabetes mellitus; DMP, disease management program; DN, diabetic nephropathy; DSMS, Diabetes self-management support; FTA, Few Touch Application; FTA-HC, Few Touch Application with Health Counselling; GCP, Good Clinical Practice; GE, group education; GI, glycaemic index; GP, general practitioner; GPwSI, general practitioner with special interest; JNC-VII, Seventh Joint National Committee; MA, medical assistant; LDL-C, low-density lipoprotein cholesterol; NGSP, National Glycohemoglobin Standardization Program; NCM, nurse case manager; NDEP, National Diabetes Education Program; PBL, problem-based learning; PCP, primary care practitioner; PDA, personal digital assistant; PL, peer leaders; PN, practice nurse; POC, point-of-care; PROM, patient-related outcome measures; PROV, Provider's education; RN, registered nurse; SMBG, self-monitoring of blood glucose; SDSMP, Spanish Diabetes Self-management Program; UQIP, Usual quality improvement program; 95% CI, 95% confidence interval; NA, not available

## SUPPLEMENTARY DATA

### References (supplementary materials)

1. Tutino GE, Yang WY, Li X, et al.; China JADE Study Group. A multicentre demonstration project to evaluate the effectiveness and acceptability of the web-based Joint Asia Diabetes Evaluation (JADE) programme with or without nurse support in Chinese patients with Type 2 diabetes. *Diabet Med* 2017;34:440-450
2. Hayashino Y, Suzuki H, Yamazaki K, Goto A, Izumi K, Noda M. A cluster randomized trial on the effect of a multifaceted intervention improved the technical quality of diabetes care by primary care physicians: The Japan Diabetes Outcome Intervention Trial-2 (J-DOIT2). *Diabet Med* 2016;33:599-608
3. Ali MK, Singh K, Kondal D, et al.; CARRS Trial Group. Effectiveness of a Multicomponent Quality Improvement Strategy to Improve Achievement of Diabetes Care Goals: A Randomized, Controlled Trial. *Ann Intern Med* 2016;165:399-408
4. Dario C, Toffanin R, Calcaterra F, et al. Telemonitoring of Type 2 Diabetes Mellitus in Italy. *Telemed J E Health* 2017;23:143-152
5. Krag MØ, Hasselbalch L, Siersma V, et al. The impact of gender on the long-term morbidity and mortality of patients with type 2 diabetes receiving structured personal care: a 13 year follow-up study. *Diabetologia* 2016;59:275-285
6. Lundström H, Siersma V, Nielsen AB, et al. The effectiveness of structured personal care of type 2 diabetes on recurrent outcomes: a 19 year follow-up of the study Diabetes Care in General Practice (DCGP). *Diabetologia* 2014;57:1119-1123
7. Hansen LJ, Siersma V, Beck-Nielsen H, de Fine Olivarius N. Structured personal care of type 2 diabetes: a 19 year follow-up of the study Diabetes Care in General Practice (DCGP). *Diabetologia* 2013;56:1243-1253
8. Nielsen AB, de Fine Olivarius N, Gannik D, Hindsberger C, Hollnagel H. Structured personal diabetes care in primary health care affects only women's HbA<sub>1c</sub>. *Diabetes Care* 2006;29:963-969
9. Olivarius NF, Beck-Nielsen H, Andreasen AH, Hørder M, Pedersen PA. Randomised controlled trial of structured personal care of type 2 diabetes mellitus. *BMJ* 2001;323:970-975
10. Johansson T, Keller S, Winkler H, Ostermann T, Weitgasser R, Sönnichsen AC. Effectiveness of a Peer Support Programme versus Usual Care in Disease Management of Diabetes Mellitus Type 2 regarding Improvement of Metabolic Control: A Cluster-Randomised Controlled Trial. *J Diabetes Res* 2016;2016:3248547
11. Chao J, Yang L, Xu H, Yu Q, Jiang L, Zong M. The effect of integrated health management model on the health of older adults with diabetes in a randomized controlled trial. *Arch Gerontol Geriatr* 2015;60:82-88
12. Edelman D, Dolor RJ, Coffman CJ, et al. Nurse-led behavioral management of diabetes and hypertension in community practices: a randomized trial. *J Gen Intern Med* 2015;30:626-633
13. Tao L, Wilson EC, Wareham NJ, et al. Cost-effectiveness of intensive multifactorial treatment compared with routine care for individuals with screen-detected Type 2 diabetes: analysis of the ADDITION-UK cluster-randomized controlled trial. *Diabet Med* 2015;32:907-919
14. Ayala GX, Ibarra L, Cherrington AL, et al. Puentes hacia una mejor vida (Bridges to a Better Life): Outcome of a Diabetes Control Peer Support Intervention. *Ann Fam Med* 2015;13 Suppl 1:S9-17
15. McDermott RA, Schmidt B, Preece C, et al. Community health workers improve diabetes care in remote Australian Indigenous communities: results of a pragmatic cluster randomized controlled trial. *BMC Health Serv Res* 2015;15:68
16. Segal L, Nguyen H, Schmidt B, Wenitong M, McDermott RA. Economic evaluation of Indigenous health worker management of poorly controlled type 2 diabetes in north Queensland. *Med J Aust* 2016;204:1961e-1969
17. Gold R, Nelson C, Cowburn S, et al. Feasibility and impact of implementing a private care system's

## SUPPLEMENTARY DATA

diabetes quality improvement intervention in the safety net: a cluster-randomized trial. *Implement Sci* 2015;10:83

18. Nicolucci A, Cercone S, Chiriatti A, Muscas F, Gensini G. A Randomized Trial on Home Telemonitoring for the Management of Metabolic and Cardiovascular Risk in Patients with Type 2 Diabetes. *Diabetes Technol Ther* 2015;17:563-570

19. Kim MT, Kim KB, Huh B, et al. The Effect of a Community-Based Self-Help Intervention: Korean Americans With Type 2 Diabetes. *Am J Prev Med* 2015;49:726-737

20. Pérez-Escamilla R, Damio G, Chhabra J, et al. Impact of a community health workers-led structured program on blood glucose control among latinos with type 2 diabetes: the DIALBEST trial. *Diabetes Care* 2015;38:197-205

21. Simmons D, Prevost AT, Bunn C, et al. Impact of community based peer support in type 2 diabetes: a cluster randomised controlled trial of individual and/or group approaches. *PLoS One* 2015;10:e0120277

22. van Dijk-de Vries A, van Bokhoven MA, Winkens B, et al. Lessons learnt from a cluster-randomised trial evaluating the effectiveness of Self-Management Support (SMS) delivered by practice nurses in routine diabetes care. *BMJ Open* 2015;5:e007014

23. Chung WW, Chua SS, Lai PS, Chan SP. Effects of a pharmaceutical care model on medication adherence and glycemetic control of people with type 2 diabetes. *Patient Prefer Adherence* 2014;8:1185-1194

24. Hsu CC, Tai TY. Long-term glycemetic control by a diabetes case-management program and the challenges of diabetes care in Taiwan. *Diabetes Res Clin Pract* 2014;106 Suppl 2:S328-332

25. Adepoju OE, Bolin JN, Phillips CD, et al. Effects of diabetes self-management programs on time-to-hospitalization among patients with type 2 diabetes: a survival analysis model. *Patient Educ Couns* 2014;95:111-117

26. Frei A, Senn O, Chmiel C, Reissner J, Held U, Rosemann T. Implementation of the chronic care model in small medical practices improves cardiovascular risk but not glycemetic control. *Diabetes Care* 2014;37:1039-1047

27. Forjuoh SN, Bolin JN, Huber JC Jr., et al. Behavioral and technological interventions targeting glycemetic control in a racially/ethnically diverse population: a randomized controlled trial. *BMC Public Health* 2014;14:71

28. Chan JC, Sui Y, Oldenburg B, et al.; JADE and PEARL Project Team. Effects of telephone-based peer support in patients with type 2 diabetes mellitus receiving integrated care: a randomized clinical trial. *JAMA Intern Med* 2014;174:972-981

29. Steventon A, Bardsley M, Doll H, Tuckey E, Newman SP. Effect of telehealth on glycaemic control: analysis of patients with type 2 diabetes in the Whole Systems Demonstrator cluster randomised trial. *BMC Health Serv Res* 2014;14:334

30. Wilson A, O'Hare JP, Hardy A, et al. Evaluation of the clinical and cost effectiveness of intermediate care clinics for diabetes (ICCD): a multicentre cluster randomised controlled trial. *PLoS One* 2014;9:e93964

31. Tang TS, Funnell M, Sinco B, et al. Comparative effectiveness of peer leaders and community health workers in diabetes self-management support: results of a randomized controlled trial. *Diabetes Care* 2014;37:1525-1534

32. Rothschild SK, Martin MA, Swider SM, et al. Mexican American trial of community health workers: a randomized controlled trial of a community health worker intervention for Mexican Americans with type 2 diabetes mellitus. *Am J Public Health* 2014;104:1540-1548

33. Holmen H, Torbjørnsen A, Wahl AK, et al. A Mobile Health Intervention for Self-Management and Lifestyle Change for Persons With Type 2 Diabetes, Part 2: One-Year Results From the Norwegian Randomized Controlled Trial RENEWING HEALTH. *JMIR MHealth and UHealth* 2014;2:e57

## SUPPLEMENTARY DATA

34. Eakin EG, Winkler EA, Dunstan DW, et al. Living well with diabetes: 24-month outcomes from a randomized trial of telephone-delivered weight loss and physical activity intervention to improve glycemic control. *Diabetes Care* 2014;37:2177-2185
35. Dickinson WP, Dickinson LM, Nutting PA, et al. Practice facilitation to improve diabetes care in primary care: a report from the EPIC randomized clinical trial. *Ann Fam Med* 2014;12:8-16
36. Slingerland AS, Herman WH, Redekop WK, Dijkstra RF, Jukema JW, Niessen LW. Stratified patient-centered care in type 2 diabetes: a cluster-randomized, controlled clinical trial of effectiveness and cost-effectiveness. *Diabetes Care* 2013;36:3054-3061
37. DePue JD, Rosen RK, Seiden A, et al. Implementation of a culturally tailored diabetes intervention with community health workers in American Samoa. *Diabetes Educ* 2013;39:761-771
38. DePue JD, Dunsiger S, Seiden AD, et al. Nurse-community health worker team improves diabetes care in American Samoa: results of a randomized controlled trial. *Diabetes Care* 2013;36:1947-1953
39. Gagliardino JJ, Arrechea V, Assad D, et al. Type 2 diabetes patients educated by other patients perform at least as well as patients trained by professionals. *Diabetes Metab Res Rev* 2013;29:152-160
40. Gagliardino JJ, Lapertosa S, Pfirter G, et al.; PRODIACOR. Clinical, metabolic and psychological outcomes and treatment costs of a prospective randomized trial based on different educational strategies to improve diabetes care (PRODIACOR). *Diabet Med* 2013;30:1102-1111
41. Sperl-Hillen J, Beaton S, Fernandes O, et al. Are benefits from diabetes self-management education sustained? *Am J Manag Care* 2013;19:104-112
42. Blackberry ID, Furler JS, Best JD, et al. Effectiveness of general practice based, practice nurse led telephone coaching on glycaemic control of type 2 diabetes: the Patient Engagement and Coaching for Health (PEACH) pragmatic cluster randomised controlled trial. *BMJ* 2013;347:f5272
43. Prezio EA, Cheng D, Balasubramanian BA, Shuval K, Kendzor DE, Culica D. Community Diabetes Education (CoDE) for uninsured Mexican Americans: a randomized controlled trial of a culturally tailored diabetes education and management program led by a community health worker. *Diabetes Res Clin Pract* 2013;100:19-28
44. Prezio EA, Pagan JA, Shuval K, Culica D. The Community Diabetes Education (CoDE) program: cost-effectiveness and health outcomes. *Am J Prev Med* 2014;47:771-779
45. Prezio EA, Balasubramanian BA, Shuval K, Cheng D, Kendzor DE, Culica D. Evaluation of quality improvement performance in the Community Diabetes Education (CoDE) program for uninsured Mexican Americans: results of a randomized controlled trial. *Am J Med Qual* 2014;29:124-134
46. Gabbay RA, Añel-TiangcoRM, Dellasega C, Mauger DT, Adelman A, Van Horn DH. Diabetes nurse case management and motivational interviewing for change (DYNAMIC): results of a 2-year randomized controlled pragmatic trial. *J Diabetes* 2013;5:349-357
47. Bosi E, Scavini M, Ceriello A, et al.; PRISMA Study Group. Intensive structured self-monitoring of blood glucose and glycemic control in noninsulin-treated type 2 diabetes: the PRISMA randomized trial. *Diabetes Care* 2013;36:2887-2894
48. Russo GT, Scavini M, Acmet E, et al. The Burden of Structured Self-Monitoring of Blood Glucose on Diabetes-Specific Quality of Life and Locus of Control in Patients with Noninsulin-Treated Type 2 Diabetes: The PRISMA Study. *Diabetes Technol Ther* 2016;18:421-428
49. Van den Donk M, Griffin SJ, Stellato RK, et al. Effect of early intensive multifactorial therapy compared with routine care on self-reported health status, general well-being, diabetes-specific quality of life and treatment satisfaction in screen-detected type 2 diabetes mellitus patients (ADDITION-Europe): a cluster-randomised trial. *Diabetologia* 2013.
50. Simmons RK, Borch-Johnsen K, Lauritzen T, et al. A randomised trial of the effect and cost-effectiveness of early intensive multifactorial therapy on 5-year cardiovascular outcomes in individuals with screen-detected type 2 diabetes: the Anglo-Danish-Dutch Study of Intensive Treatment in People with Screen-Detected Diabetes in Primary Care (ADDITION-Europe) study. *Health Technol Assess*

## SUPPLEMENTARY DATA

2016;20:1-86

51. Herman WH, Ye W, Griffin SJ, et al. Early Detection and Treatment of Type 2 Diabetes Reduce Cardiovascular Morbidity and Mortality: A Simulation of the Results of the Anglo-Danish-Dutch Study of Intensive Treatment in People With Screen-Detected Diabetes in Primary Care (ADDITION-Europe). *Diabetes Care* 2015;38:1449-1455
52. Sandbaek A, Griffin SJ, Sharp SJ, et al. Effect of early multifactorial therapy compared with routine care on microvascular outcomes at 5 years in people with screen-detected diabetes: a randomized controlled trial: the ADDITION-Europe Study. *Diabetes Care* 2014;37:2015-2023
53. Mons U, Raum E, Krämer HU, et al. Effectiveness of a supportive telephone counseling intervention in type 2 diabetes patients: randomized controlled study. *PLoS One* 2013;8:e77954
54. Crowley MJ, Powers BJ, Olsen MK, et al. The Cholesterol, Hypertension, And Glucose Education (CHANGE) study: results from a randomized controlled trial in African Americans with diabetes. *Am Heart J* 2013;166:179-186
55. Mohamed H, Al-Lenjawi B, Amuna P, Zotor F, Elmahdi H. Culturally sensitive patient-centred educational programme for self-management of type 2 diabetes: a randomized controlled trial. *Prim Care Diabetes* 2013;7:199-206
56. Liu S, Bi A, Fu D, et al. Effectiveness of using group visit model to support diabetes patient self-management in rural communities of Shanghai: a randomized controlled trial. *BMC Public Health* 2012;12:1043
57. Trief PM, Izquierdo R, Eimicke JP, et al. Adherence to diabetes self care for white, African-American and Hispanic American telemedicine participants: 5 year results from the IDEATel project. *Ethn Health* 2013;18:83-96
58. Weinstock RS, Teresi JA, Golland R, et al.; IDEATel Consortium. Glycemic control and health disparities in older ethnically diverse underserved adults with diabetes: five-year results from the Informatics for Diabetes Education and Telemedicine (IDEATel) study. *Diabetes Care* 2011;34:274-279
59. Nishita C, Cardazone G, Uehara DL, Tom T. Empowered diabetes management: life coaching and pharmacist counseling for employed adults with diabetes. *Health Educ Behav* 2013;40:581-591
60. Flamm M, Panisch S, Winkler H, Johansson T, Weitgasser R, Sonnichsen AC. Effectiveness of the Austrian disease management programme "Therapie Aktiv" for type 2 diabetes regarding the improvement of metabolic control, risk profile and guideline adherence: 2 years of follow up. *Wien Klin Wochenschr* 2012;124:639-646
61. Sonnichsen AC, Winkler H, Flamm M, et al. The effectiveness of the Austrian disease management programme for type 2 diabetes: a cluster-randomised controlled trial. *BMC Fam Pract* 2010;11:86
62. Glasgow RE, Kurz D, King D, et al. Twelve-month outcomes of an Internet-based diabetes self-management support program. *Patient Educ Couns* 2012;87:81-92
63. Simmons RK, Sharp SJ, Sandbaek A, et al. Does early intensive multifactorial treatment reduce total cardiovascular burden in individuals with screen-detected diabetes? Findings from the ADDITION-Europe cluster-randomized trial. *Diabet Med* 2012;29:e409-416
64. Griffin SJ, Borch-Johnsen K, Davies MJ, et al. Effect of early intensive multifactorial therapy on 5-year cardiovascular outcomes in individuals with type 2 diabetes detected by screening (ADDITION-Europe): a cluster-randomised trial. *Lancet* 2011;378:156-167
65. Webb DR, Khunti K, Gray LJ, et al.; ADDITION-Leicester study group. Intensive multifactorial intervention improves modelled coronary heart disease risk in screen-detected Type 2 diabetes mellitus: a cluster randomized controlled trial. *Diabet Med* 2012;29:531-540
66. Rubak S, Sandbaek A, Lauritzen T, Borch-Johnsen K, Christensen B. Effect of "motivational interviewing" on quality of care measures in screen detected type 2 diabetes patients: a one-year follow-up of an RCT, ADDITION Denmark. *Scan J Prim Health Care* 2011;29:92-98
67. van den Donk M, Gorter KJ, Rutten GE. No negative effects of a multi-factorial, intensified

## SUPPLEMENTARY DATA

- treatment on self-reported health status, treatment satisfaction, and diabetes-related distress in screen-detected type 2 diabetes patients. The ADDITION-Netherlands study. *Qual Life Res* 2010;19:509-513
68. Janssen PG, Gorter KJ, Stolk RP, Rutten GE. Randomised controlled trial of intensive multifactorial treatment for cardiovascular risk in patients with screen-detected type 2 diabetes: 1-year data from the ADDITION Netherlands study. *Br J Gen Pract* 2009;59:43-48
69. Rygg LØ, Rise MB, Grønning K, Steinsbekk A. Efficacy of ongoing group based diabetes self-management education for patients with type 2 diabetes mellitus. A randomised controlled trial. *Patient Educ Couns* 2012;86:98-105
70. McMahan GT, Fonda SJ, Gomes HE, Alexis G, Conlin PR. A randomized comparison of online- and telephone-based care management with internet training alone in adult patients with poorly controlled type 2 diabetes. *Diabetes Technol Ther* 2012;14:1060-1067
71. Fisher L, Polonsky WH, Parkin CG, Jelsovsky Z, Petersen B, Wagner RS. The impact of structured blood glucose testing on attitudes toward self-management among poorly controlled, insulin-naïve patients with type 2 diabetes. *Diabetes Res Clin Pract* 2012;96:149-155
72. Polonsky WH, Fisher L, Schikman CH, et al. Structured self-monitoring of blood glucose significantly reduces A1C levels in poorly controlled, noninsulin-treated type 2 diabetes: results from the Structured Testing Program study. *Diabetes Care* 2011;34:262-267
73. Estrada CA, Safford MM, Salanitro AH, et al. A web-based diabetes intervention for physician: a cluster-randomized effectiveness trial. *Int J Qual Health Care* 2011;23:682-689
74. Crasto W, Jarvis J, Khunti K, et al. Multifactorial intervention in individuals with type 2 diabetes and microalbuminuria: the Microalbuminuria Education and Medication Optimisation (MEMO) study. *Diabetes Res Clin Pract* 2011;93:328-336
75. Sherifali D, Greb JL, Amirthavasari G, et al. Effect of computer-generated tailored feedback on glycemic control in people with diabetes in the community: a randomized controlled trial. *Diabetes Care* 2011;34:1794-1798
76. Rosal MC, Ockene IS, Restrepo A, et al. Randomized trial of a literacy-sensitive, culturally tailored diabetes self-management intervention for low-income latinos: latinos en control. *Diabetes Care* 2011;34:838-844
77. Allen JK, Dennison-Himmelfarb CR, Szanton SL, et al. Community Outreach and Cardiovascular Health (COACH) Trial: a randomized, controlled trial of nurse practitioner/community health worker cardiovascular disease risk reduction in urban community health centers. *Circ Cardiovasc Qual Outcomes* 2011;4:595-602
78. Quinn CC, Shardell MD, Terrin ML, Barr EA, Ballew SH, Gruber-Baldini AL. Cluster-randomized trial of a mobile phone personalized behavioral intervention for blood glucose control. *Diabetes Care* 2011;34:1934-1942
79. Fischer HH, Eisert SL, Durfee MJ, et al. The impact of tailored diabetes registry report cards on measures of disease control: a nested randomized trial. *BMC Med Inform Decis Mak* 2011;11:12
80. Salinero-Fort MA, Carrillo-de Santa Pau E, Arrieta-Blanco FJ, et al. Effectiveness of PRECEDE model for health education on changes and level of control of HbA<sub>1c</sub>, blood pressure, lipids, and body mass index in patients with type 2 diabetes mellitus. *BMC Public Health* 2011;11:267
81. Rosenbek Minet LK, Wagner L, Lønving EM, Hjelmberg J, Henriksen JE. The effect of motivational interviewing on glycaemic control and perceived competence of diabetes self-management in patients with type 1 and type 2 diabetes mellitus after attending a group education programme: a randomised controlled trial. *Diabetologia* 2011;54:1620-1629
82. Smith SM, Paul G, Kelly A, Whitford DL, O'Shea E, O'Dowd T. Peer support for patients with type 2 diabetes: cluster randomised controlled trial. *BMJ* 2011;342:d715
83. Huang MC, Hsu CC, Wang HS, Shin SJ. Prospective randomized controlled trial to evaluate effectiveness of registered dietitian-led diabetes management on glycemic and diet control in a primary

## SUPPLEMENTARY DATA

care setting in Taiwan. *Diabetes Care* 2010;33:233-239

84. Trento M, Gamba S, Gentile L, et al.; ROMEO Investigators. Rethink Organization to iMprove Education and Outcomes (ROMEO): a multicenter randomized trial of lifestyle intervention by group care to manage type 2 diabetes. *Diabetes Care* 2010;33:745-747

85. Piatt GA, Songer TJ, Brooks MM, et al. Impact of patient level factors on the improvement of the ABCs of diabetes. *Patient Educ Couns* 2011;82:266-270

86. Piatt GA, Orchard TJ, Emerson S, et al. Translating the chronic care model into the community: results from a randomized controlled trial of a multifaceted diabetes care intervention. *Diabetes Care* 2006;29:811-817

87. Barceló A, Cafiero E, de Boer M, et al. Using collaborative learning to improve diabetes care and outcomes: the VIDA project. *Prim Care Diabetes* 2010;4:145-153

88. Cleveringa FG, Welsing PM, van den Donk M, et al. Cost-effectiveness of the diabetes care protocol, a multifaceted computerized decision support diabetes management intervention that reduces cardiovascular risk. *Diabetes Care* 2010;33:258-263

89. Cleveringa FG, Gorter KJ, van den Donk M, Rutten GE. Combined task delegation, computerized decision support, and feedback improve cardiovascular risk for type 2 diabetic patients: a cluster randomized trial in primary care. *Diabetes Care* 2008;31:2273-2275

90. Cleveringa FG, Minkman MH, Gorter KJ, van den Donk M, Rutten GE. Diabetes Care Protocol: effects on patient-important outcomes. A cluster randomized, non-inferiority trial in primary care. *Diabet Med* 2010;27:442-450

91. Davis RM, Hitch AD, Salaam MM, Herman WH, Zimmer-Galler IE, Mayer-Davis EJ. TeleHealth improves diabetes self-management in an underserved community: diabetes TeleCare. *Diabetes Care* 2010;33:1712-1717

92. Jameson JP, Baty PJ. Pharmacist collaborative management of poorly controlled diabetes mellitus: a randomized controlled trial. *Am J Manag Care* 2010;16:250-255

93. Edelman D, Fredrickson SK, Melnyk SD, et al. Medical clinics versus usual care for patients with both diabetes and hypertension: a randomized trial. *Ann Intern Med* 2010;152:689-696

94. Goderis G, Borgermans L, Grol R, et al. Start improving the quality of care for people with type 2 diabetes through a general practice support program: a cluster randomized trial. *Diabetes Res Clin Pract* 2010;88:56-64

95. Borgermans L, Goderis G, Van Den Broeke C, et al. Interdisciplinary diabetes care teams operating on the interface between primary and specialty care are associated with improved outcomes of care: findings from the Leuven Diabetes Project. *BMC Health Serv Res* 2009;9:179

96. Chan JC, So WY, Yeung CY, et al.; SURE Study Group. Effects of structured versus usual care on renal endpoint in type 2 diabetes: the SURE study: a randomized multicenter translational study. *Diabetes Care* 2009;32:977-982

97. Ko GT, Yeung CY, Leung WY, et al. Cost implication of team-based structured versus usual care for type 2 diabetic patients with chronic renal disease. *Hong Kong Med J* 2011;17 Suppl 6:9-12

98. Shea S, Weinstock RS, Teresi JA, et al.; IDEATel Consortium. A randomized trial comparing telemedicine case management with usual care in older, ethnically diverse, medically underserved patients with diabetes mellitus: 5 year results of the IDEATel study. *J Am Med Inform Assoc* 2009;16:446-456

99. Shea S, Weinstock RS, Starren J, et al. A randomized trial comparing telemedicine case management with usual care in older, ethnically diverse, medically underserved patients with diabetes mellitus. *J Am Med Inform Assoc* 2006;13:40-51

100. Gary TL, Batts-Turner M, Yeh HC, et al. The effects of a nurse case manager and a community health worker team on diabetic control, emergency department visits, and hospitalizations among urban African Americans with type 2 diabetes mellitus: a randomized controlled trial. *Arch Intern Med*



## SUPPLEMENTARY DATA

2009;169:1788-1794

101. Gary TL, Bone LR, Hill MN, et al. Randomized controlled trial of the effects of nurse case manager and community health worker interventions on risk factors for diabetes-related complications in urban African Americans. *Prev Med* 2003;37:23-32
102. Rodríguez-Idígoras MI, Sepúlveda-Muñoz J, Sánchez-Garrido-Escudero R, et al. Telemedicine influence on the follow-up of type 2 diabetes patients. *Diabetes Technol Ther* 2009;11:431-437
103. Al Mazroui NR, Kamal MM, Ghabash NM, Yacout TA, Kole PL, McElnay JC. Influence of pharmaceutical care on health outcomes in patients with Type 2 diabetes mellitus. *Br J Clin Pharmacol* 2009;67:547-557
104. O'Connor PJ, Sperl-Hillen JM, Johnson PE, et al. Simulated physician learning intervention to improve safety and quality of diabetes care: a randomized trial. *Diabetes Care* 2009;32:585-590
105. Samuel-Hodge CD, Keyserling TC, Park S, Johnston LF, Gizlice Z, Bangdiwala SI. A randomized trial of a church-based diabetes self-management program for African Americans with type 2 diabetes. *Diabetes Educ* 2009;35:439-454
106. Weitzman S, Greenfield S, Billimek J, et al. Improving combined diabetes outcomes by adding a simple patient intervention to physician feedback: a cluster randomized trial. *Isr Med Assoc J* 2009;11:719-724
107. Anderson RM, Funnell MM, Aikens JE, et al. Evaluating the Efficacy of an Empowerment-Based Self-Management Consultant Intervention: Results of a Two-Year Randomized Controlled Trial. *Ther Patient Educ* 2009;1:3-11
108. Powers BJ, Olsen MK, Oddone EZ, Bosworth HB. The effect of a hypertension self-management intervention on diabetes and cholesterol control. *Am J Med* 2009;122:639-646
109. O'Connor PJ, Sperl-Hillen J, Johnson PE, Rush WA, Crain AL. Customized feedback to patients and providers failed to improve safety or quality of diabetes care: a randomized trial. *Diabetes Care* 2009;32:1158-1163
110. Ma J, Berra K, Haskell WL, et al. Case management to reduce risk of cardiovascular disease in a county health care system. *Arch Intern Med* 2009;169:1988-1995
111. Newman SP, Cooke D, Casbard A, et al. A randomised controlled trial to compare minimally invasive glucose monitoring devices with conventional monitoring in the management of insulin-treated diabetes mellitus (MITRE). *Health Technol Assess* 2009;13:iii-iv, ix-xi, 1-194
112. van Bruggen R, Gorter KJ, Stolk RP, Verhoeven RP, Rutten GE. Implementation of locally adapted guidelines on type 2 diabetes. *Fam Pract* 2008;25:430-437
113. Grant RW, Wald JS, Schnipper JL, et al. Practice-linked online personal health records for type 2 diabetes mellitus: a randomized controlled trial. *Arch Intern Med* 2008;168:1776-1782
114. Smith SA, Shah ND, Bryant SC, et al.; Evidens Research Group. Chronic care model and shared care in diabetes: randomized trial of an electronic decision support system. *Mayo Clin Proc* 2008;83:747-757
115. Peterson KA, Radosevich DM, O'Connor PJ, et al. Improving Diabetes Care in Practice: findings from the TRANSLATE trial. *Diabetes Care* 2008;31:2238-2243
116. Christian JG, Bessesen DH, Byers TE, Christian KK, Goldstein MG, Bock BC. Clinic-based support to help overweight patients with type 2 diabetes increase physical activity and lose weight. *Arch Intern Med* 2008;168:141-146
117. Duran A, Runkle I, Matía P, et al. Family physician and endocrinologist coordination as the basis for diabetes care in clinical practice. *BMC Endocr Disord* 2008;8:9
118. O'Kane MJ, Bunting B, Copeland M, Coates VE; ESMON study group. Efficacy of self monitoring of blood glucose in patients with newly diagnosed type 2 diabetes (ESMON study): randomised controlled trial. *BMJ* 2008;336:1174-1177
119. Simon J, Gray A, Clarke P, Wade A, Neil A, Farmer A; Diabetes Glycaemic Education and

## SUPPLEMENTARY DATA

Monitoring Trial Group. Cost effectiveness of self monitoring of blood glucose in patients with non-insulin treated type 2 diabetes: economic evaluation of data from the DiGEM trial. *BMJ* 2008;336:1177-1180

120. Farmer A, Wade A, Goyder E, et al. Impact of self monitoring of blood glucose in the management of patients with non-insulin treated diabetes: open parallel group randomised trial. *BMJ* 2007;335:132

121. Lorig K, Ritter PL, Villa F, Piette JD. Spanish diabetes self-management with and without automated telephone reinforcement: two randomized trials. *Diabetes Care* 2008;31:408-414

122. Dijkstra R, Braspenning J, Grol R. Implementing diabetes passports to focus practice reorganization on improving diabetes care. *Int J Qual Health Care* 2008;20:72-77

123. Bellary S, O'Hare JP, Raymond NT, et al.; UKADS Study Group. Enhanced diabetes care to patients of south Asian ethnic origin (the United Kingdom Asian Diabetes Study): a cluster randomised controlled trial. *Lancet* 2008;371:1769-1776

124. O'Hare JP, Raymond NT, Mughal S, et al. Evaluation of delivery of enhanced diabetes care to patients of South Asian ethnicity: the United Kingdom Asian Diabetes Study (UKADS). *Diabet Med* 2004;21:1357-1365

125. Eccles MP, Whitty PM, Speed C, et al. A pragmatic cluster randomised controlled trial of a Diabetes REcall And Management system: the DREAM trial. *Implement Sci* 2007;2:6

126. Herrin J, Cangialose CB, Nicewander D, Ballard DJ. Cost and effects of performance feedback and nurse case management for medicare beneficiaries with diabetes: a randomized controlled trial. *Dis Manag* 2007;10:328-336

127. Herrin J, Nicewander DA, Hollander PA, et al. Effectiveness of diabetes resource nurse case management and physician profiling in a fee-for-service setting: a cluster randomized trial. *Proc (Bayl Univ Med Cent)* 2006;19:95-102

128. Thomas KG, Thomas MR, Stroebel RJ, et al. Use of a registry-generated audit, feedback, and patient reminder intervention in an internal medicine resident clinic--a randomized trial. *J Gen Intern Med* 2007;22:1740-1744

129. Johansen OE, Gullestad L, Blaasaas KG, Orvik E, Birkeland KI. Effects of structured hospital-based care compared with standard care for Type 2 diabetes-The Asker and Baerum Cardiovascular Diabetes Study, a randomized trial. *Diabet Med* 2007;24:1019-1027

130. Chin MH, Drum ML, Guillen M, et al. Improving and sustaining diabetes care in community health centers with the health disparities collaboratives. *Med Care* 2007;45:1135-1143

131. Perria C, Mandolini D, Guerrera C, et al. Implementing a guideline for the treatment of type 2 diabetics: results of a cluster-randomized controlled trial (C-RCT). *BMC Health Serv Res* 2007;7:79

132. Clancy DE, Huang P, Okonofua E, Yeager D, Magruder KM. Group visits: promoting adherence to diabetes guidelines. *J Gen Intern Med* 2007;22:620-624

133. Bebb C, Kendrick D, Coupland C, et al. A cluster randomised controlled trial of the effect of a treatment algorithm for hypertension in patients with type 2 diabetes. *Br J Gen Pract* 2007;57:136-143

134. Fornos JA, Andrés NF, Andrés JC, Guerra MM, Egea B. A pharmacotherapy follow-up program in patients with type-2 diabetes in community pharmacies in Spain. *Pharm World Sci* 2006;28:65-72

135. Gabbay RA, Lendel I, Saleem TM, et al. Nurse case management improves blood pressure, emotional distress and diabetes complication screening. *Diabetes Res Clin Pract* 2006;71:28-35

136. Wu JY, Leung WY, Chang S, et al. Effectiveness of telephone counselling by a pharmacist in reducing mortality in patients receiving polypharmacy: randomised controlled trial. *BMJ* 2006;333:522

137. Harno K, Kauppinen-Mäkelin R, Syrjäläinen J. Managing diabetes care using an integrated regional e-health approach. *J Telemed Telecare* 2006;12 Suppl 1:13-15

138. O'Connor PJ, Desai J, Solberg LI, et al. Randomized trial of quality improvement intervention to improve diabetes care in primary care settings. *Diabetes Care* 2005;28:1890-1897

139. Gerber BS, Brodsky IG, Lawless KA, et al. Implementation and evaluation of a low-literacy

## SUPPLEMENTARY DATA

- diabetes education computer multimedia application. *Diabetes Care* 2005;28:1574-1580
140. McMahon GT, Gomes HE, Hickson Hohne S, Hu TM, Levine BA, Conlin PR. Web-based care management in patients with poorly controlled diabetes. *Diabetes Care* 2005;28:1624-1629
141. Rothman RL, Malone R, Bryant B, et al. A randomized trial of a primary care-based disease management program to improve cardiovascular risk factors and glycosylated hemoglobin levels in patients with diabetes. *Am J Med* 2005;118:276-284
142. Phillips LS, Ziemer DC, Doyle JP, et al. An endocrinologist-supported intervention aimed at providers improves diabetes management in a primary care site: improving primary care of African Americans with diabetes (IPCAAD) 7. *Diabetes Care* 2005;28:2352-2360
143. Glasgow RE, Nutting PA, King DK, et al. Randomized effectiveness trial of a computer-assisted intervention to improve diabetes care. *Diabetes Care* 2005;28:33-39
144. Dijkstra RF, Braspenning JC, Huijsmans Z, et al. Introduction of diabetes passports involving both patients and professionals to improve hospital outpatient diabetes care. *Diabetes Res Clin Pract* 2005;68:126-134
145. Dijkstra RF, Niessen LW, Braspenning JC, Adang E, Grol RT. Patient-centred and professional-directed implementation strategies for diabetes guidelines: a cluster-randomized trial-based cost-effectiveness analysis. *Diabet Med* 2006;23:164-170
146. Mason JM, Freemantle N, Gibson JM, New JP. Specialist nurse-led clinics to improve control of hypertension and hyperlipidemia in diabetes: economic analysis of the SPLINT trial. *Diabetes Care* 2005;28:40-46
147. New JP, Mason JM, Freemantle N, et al. Specialist nurse-led intervention to treat and control hypertension and hyperlipidemia in diabetes (SPLINT): a randomized controlled trial. *Diabetes Care* 2003;26:2250-2255
148. Clifford RM, Davis WA, Batty KT, Davis TM. Effect of a pharmaceutical care program on vascular risk factors in type 2 diabetes: the Fremantle Diabetes Study. *Diabetes Care* 2005;28:771-776
149. Mehler PS, Krantz MJ, Lundgren RA, et al. Bridging the quality gap in diabetic hyperlipidemia: a practice-based intervention. *Am J Med* 2005;118:1414
150. Maljanian R, Grey N, Staff I, Conroy L. Intensive telephone follow-up to a hospital-based disease management model for patients with diabetes mellitus. *Dis Manag* 2005;8:15-25
151. Simmons D, Gamble GD, Foote S, Cole DR, Coster G. The New Zealand Diabetes Passport Study: a randomized controlled trial of the impact of a diabetes passport on risk factors for diabetes-related complications. *Diabet Med* 2004;21:214-217
152. New JP, Mason JM, Freemantle N, et al. Educational outreach in diabetes to encourage practice nurses to use primary care hypertension and hyperlipidaemia guidelines (EDEN): a randomized controlled trial. *Diabet Med* 2004;21:599-603
153. Wolf AM, Conaway MR, Crowther JQ, et al. Translating lifestyle intervention to practice in obese patients with type 2 diabetes: Improving Control with Activity and Nutrition (ICAN) study. *Diabetes Care* 2004;27:1570-1576
154. California Medi-Cal Type 2 Diabetes Study Group. Closing the gap: effect of diabetes case management on glycemic control among low-income ethnic minority populations: the California Medi-Cal type 2 diabetes study. *Diabetes Care* 2004;27:95-103
155. Krein SL, Klamerus ML, Vijan S, et al. Case management for patients with poorly controlled diabetes: a randomized trial. *Am J Med* 2004;116:732-739
156. Smith S, Bury G, O'Leary M, et al. The North Dublin randomized controlled trial of structured diabetes shared care. *Fam Pract* 2004;21:39-45
157. Trento M, Passera P, Borgo E, et al. A 5-year randomized controlled study of learning, problem solving ability, and quality of life modifications in people with type 2 diabetes managed by group care. *Diabetes Care* 2004;27:670-675

## SUPPLEMENTARY DATA

158. Trento M, Passera P, Bajardi M, et al. Lifestyle intervention by group care prevents deterioration of Type II diabetes: a 4-year randomized controlled clinical trial. *Diabetologia* 2002;45:1231-1239
159. Trento M, Passera P, Tomalino M, et al. Group visits improve metabolic control in type 2 diabetes: a 2-year follow-up. *Diabetes Care* 2001;24:995-1000
160. Ko GT, Li JK, Kan EC, Lo MK. Effects of a structured health education programme by a diabetic education nurse on cardiovascular risk factors in Chinese Type 2 diabetic patients: a 1-year prospective randomized study. *Diabet Med* 2004;21:1274-1279
161. Reiber GE, Au D, McDonell M, Fihn SD. Diabetes quality improvement in Department of Veterans Affairs Ambulatory Care Clinics: a group-randomized clinical trial. *Diabetes Care* 2004;27 Suppl 2:B61-68
162. Gaede P, Lund-Andersen H, Parving HH, Pedersen O. Effect of a multifactorial intervention on mortality in type 2 diabetes. *N Engl J Med* 2008;358:580-591
163. Gaede P, Valentine WJ, Palmer AJ, et al. Cost-effectiveness of intensified versus conventional multifactorial intervention in type 2 diabetes: results and projections from the Steno-2 study. *Diabetes Care* 2008;31:1510-1515
164. Gaede P, Vedel P, Larsen N, Jensen GV, Parving HH, Pedersen O. Multifactorial intervention and cardiovascular disease in patients with type 2 diabetes. *N Engl J Med* 2003;348:383-393
165. Gaede P, Vedel P, Parving HH, Pedersen O. Intensified multifactorial intervention in patients with type 2 diabetes mellitus and microalbuminuria: the Steno type 2 randomised study. *Lancet* 1999;353:617-622
166. Jones H, Edwards L, Vallis TM, et al. Changes in diabetes self-care behaviors make a difference in glycemic control: the Diabetes Stages of Change (DiSC) study. *Diabetes Care* 2003;26:732-737
167. Meigs JB, Cagliero E, Dubey A, et al. A controlled trial of web-based diabetes disease management: the MGH diabetes primary care improvement project. *Diabetes Care* 2003;26:750-757
168. Ilag LL, Martin CL, Tabaei BP, et al. Improving diabetes processes of care in managed care. *Diabetes Care* 2003;26:2722-2727
169. Litaker D, Mion L, Planavsky L, Kippes C, Mehta N, Frolkis J. Physician - nurse practitioner teams in chronic disease management: the impact on costs, clinical effectiveness, and patients' perception of care. *J Interprof Care* 2003;17:223-237
170. Taylor CB, Miller NH, Reilly KR, et al. Evaluation of a nurse-care management system to improve outcomes in patients with complicated diabetes. *Diabetes Care* 2003;26:1058-1063
171. Frijling BD, Lobo CM, Hulscher ME, et al. Multifaceted support to improve clinical decision making in diabetes care: a randomized controlled trial in general practice. *Diabet Med* 2002;19:836-842
172. Brown SA, Garcia AA, Kouzekanani K, Hanis CL. Culturally competent diabetes self-management education for Mexican Americans: the Starr County border health initiative. *Diabetes Care* 2002;25:259-268
173. Hirsch IB, Goldberg HI, Ellsworth A, et al. A multifaceted intervention in support of diabetes treatment guidelines: a cont trial. *Diabetes Res Clin Pract* 2002;58:27-36
174. Keyserling TC, Samuel-Hodge CD, Ammerman AS, et al. A randomized trial of an intervention to improve self-care behaviors of African-American women with type 2 diabetes: impact on physical activity. *Diabetes Care* 2002;25:1576-1583
175. Pouwer F, Snoek FJ, van der Ploeg HM, Adèr HJ, Heine RJ. Monitoring of psychological well-being in outpatients with diabetes: effects on mood, HbA<sub>1c</sub>, and the patient's evaluation of the quality of diabetes care: a randomized controlled trial. *Diabetes Care* 2001;24:1929-1935
176. Groeneveld Y, Petri H, Hermans J, Springer M. An assessment of structured care assistance in the management of patients with type 2 diabetes in general practice. *Scand J Prim Health Care* 2001;19:25-30
177. Wagner EH, Grothaus LC, Sandhu N, et al. Chronic care clinics for diabetes in primary care: a

## SUPPLEMENTARY DATA

system-wide randomized trial. *Diabetes Care* 2001;24:695-700

178. Kiefe CI, Allison JJ, Williams OD, Person SD, Weaver MT, Weissman NW. Improving quality improvement using achievable benchmarks for physician feedback: a randomized controlled trial. *JAMA* 2001;285:2871-2879

179. Piette JD, Weinberger M, Kraemer FB, McPhee SJ. Impact of automated calls with nurse follow-up on diabetes treatment outcomes in a Department of Veterans Affairs Health Care System: a randomized controlled trial. *Diabetes Care* 2001;24:202-208

180. Piette JD, Weinberger M, McPhee SJ, Mah CA, Kraemer FB, Crapo LM. Do automated calls with nurse follow-up improve self-care and glycemic control among vulnerable patients with diabetes? *Am J Med* 2000;108:20-27

181. Piette JD, Weinberger M, McPhee SJ. The effect of automated calls with telephone nurse follow-up on patient-centered outcomes of diabetes care: a randomized, controlled trial. *Med Care* 2000;38:218-230
